# Supplementary material for: 1,2,4-Triazolo[4,3-c]quinazolines: a bioisosterism-guided approach towards the development of novel PCAF inhibitors with potential anticancer activity
Source: Royal Society of Chemistry journal article supplement (doi:10.1039/d1nj00710f), 2021-01-01

## 1,2,4-Triazolo[4,3-c]quinazolines: A bioisosterism-guided approach towards the development of novel PCAF inhibitors with potential anticancer activity

Mohamed H. El-Shershaby<sup>a</sup>, Adel Ghiaty<sup>a</sup>, Ashraf H. Bayoumi<sup>a</sup>, Hany E. A. Ahmed<sup>a,b</sup>, Mona S. El-Zoghbi<sup>c</sup>, Khaled El-Adl<sup>d,e</sup>, Hamada S. Abulkhair<sup>a,f\*</sup>

---

### Supporting Information

#### Contents

|                                               |    |
|-----------------------------------------------|----|
| Docking Files .....                           | 4  |
| Summary of docking results .....              | 4  |
| Predicted binding mode of I-45 redocked ..... | 7  |
| Predicted binding mode of 21 .....            | 12 |
| Predicted binding mode of 22 .....            | 14 |
| Predicted binding mode of 23 .....            | 16 |
| Predicted binding mode of 24 .....            | 19 |
| Predicted binding mode of 25 .....            | 22 |
| Predicted binding mode of 26 .....            | 24 |
| Predicted binding mode of 27 .....            | 26 |
| Predicted binding mode of 28 .....            | 28 |
| Predicted binding mode of 29 .....            | 30 |
| Predicted binding mode of 30 .....            | 32 |
| Predicted binding mode of 31 .....            | 34 |
| Predicted binding mode of 32 .....            | 36 |
| Predicted binding mode of 33 .....            | 38 |

|                                                  |    |
|--------------------------------------------------|----|
| Predicted binding mode of 34 .....               | 40 |
| Predicted binding mode of 35 .....               | 42 |
| Predicted binding mode of 36 .....               | 44 |
| In silico Pharmacokinetic Studies .....          | 46 |
| Pharmacokinetic Properties of 21 .....           | 46 |
| Pharmacokinetic Properties of 22 .....           | 49 |
| Pharmacokinetic Properties of 23 .....           | 52 |
| Pharmacokinetic Properties of 24 .....           | 56 |
| Pharmacokinetic Properties .....                 | 59 |
| Pharmacokinetic Properties of 26 .....           | 62 |
| Spectral Data of New Compounds.....              | 67 |
| IR spectrum of compound 21 .....                 | 67 |
| <sup>1</sup> H NMR Spectrum of compound 21 ..... | 68 |
| Mass spectrum of compound 21 .....               | 69 |
| IR spectrum of compound 22 .....                 | 70 |
| <sup>1</sup> H NMR Spectrum of compound 22 ..... | 71 |
| Mass spectrum of compound 22 .....               | 72 |
| IR spectrum of compound 24 .....                 | 73 |
| <sup>1</sup> H NMR Spectrum of compound 24 ..... | 74 |
| Mass Spectrum of Compound 24 .....               | 75 |
| IR spectrum of compound 27 .....                 | 76 |
| <sup>1</sup> H NMR Spectrum of compound 27 ..... | 77 |
| Mass Spectrum of Compound 27 .....               | 78 |
| IR spectrum of compound 28 .....                 | 79 |

|                                                   |    |
|---------------------------------------------------|----|
| IR spectrum of compound 29 .....                  | 80 |
| Mass Spectrum of Compound 29 .....                | 81 |
| IR spectrum of compound 31 .....                  | 82 |
| <sup>1</sup> H NMR Spectrum of compound 31 .....  | 83 |
| <sup>13</sup> C NMR Spectrum of compound 31 ..... | 84 |
| Mass Spectrum of Compound 31 .....                | 85 |
| IR spectrum of compound 32 .....                  | 86 |
| <sup>1</sup> H NMR Spectrum of compound 32 .....  | 87 |
| Mass Spectrum of Compound 32 .....                | 88 |
| IR spectrum of compound 33 .....                  | 89 |
| <sup>1</sup> H NMR Spectrum of compound 33 .....  | 90 |
| Mass Spectrum of Compound 33 .....                | 91 |
| IR spectrum of compound 34 .....                  | 92 |
| <sup>1</sup> H NMR Spectrum of compound 34 .....  | 93 |
| <sup>13</sup> C NMR Spectrum of compound 34 ..... | 94 |
| Mass Spectrum of Compound 34 .....                | 95 |
| IR spectrum of compound 35 .....                  | 96 |
| <sup>1</sup> H NMR Spectrum of compound 35 .....  | 97 |
| <sup>13</sup> C NMR Spectrum of compound 35 ..... | 98 |
| Mass Spectrum of Compound 35 .....                | 99 |

## Docking Files

### Summary of docking results

Table 1: Results of in silico docking scores for new compounds and the co-crystallized ligand (L-45) with the binding site of histone acetyltransferase GCN5

| Comp.       | $\Delta G$<br>(kcal/mol) | RMSD<br>(Å) | Ligand | Receptor | H-bonding interactions |              | Hydrophobic interactions |              |
|-------------|--------------------------|-------------|--------|----------|------------------------|--------------|--------------------------|--------------|
|             |                          |             |        |          | Residue                | Distance (Å) | Residue                  | Distance (Å) |
| <b>L-45</b> | -11.52                   | 0.81        | C 15   | OE2      | GLU 1389               | 3.47         |                          |              |
|             |                          |             | N 19   | OE1      | GLU 1389               | 2.82         |                          |              |
|             |                          |             | N 13   | ND2      | ASN 1436               | 3.40         |                          |              |
|             |                          |             | 6-ring | 6-ring   |                        |              | TYR 1442                 | 3.63         |
| <b>21</b>   | -10.15                   | 0.98        | N 13   | ND2      | ASN 1436               | 3.31         |                          |              |
|             |                          |             | 6-ring | 6-ring   |                        |              | TYR 1442                 | 3.62         |
| <b>22</b>   | -10.12                   | 1.19        | 6-ring | CZ3      |                        |              | TRP 1379                 | 4.10         |
|             |                          |             | 6-ring | CZ3      |                        |              | TRP 1379                 | 4.34         |
|             |                          |             | 6-ring | CG2      |                        |              | VAL 1385                 | 3.60         |
|             |                          |             | 6-ring | 6-ring   |                        |              | TYR 1442                 | 3.77         |
| <b>23</b>   | -10.98                   | 1.00        | N 7    | OE1      | GLU 1389               | 3.09         |                          |              |
|             |                          |             | CL 21  | O        | THR 1401               | 3.24         |                          |              |
|             |                          |             | N 12   | ND2      | ASN 1436               | 2.84         |                          |              |
|             |                          |             | 5-ring | 6-ring   |                        |              | TYR 1442                 | 3.85         |
|             |                          |             | 6-ring | 6-ring   |                        |              | TYR 1442                 | 3.84         |
| <b>24</b>   | -10.26                   | 1.20        | CL 14  | O        | PRO 1380               | 3.20         |                          |              |

| Comp.     | $\Delta G$<br>(kcal/mol) | RMSD<br>(Å) | Ligand | Receptor | H-bonding interactions |              | Hydrophobic interactions |              |
|-----------|--------------------------|-------------|--------|----------|------------------------|--------------|--------------------------|--------------|
|           |                          |             |        |          | Residue                | Distance (Å) | Residue                  | Distance (Å) |
|           |                          |             | N 13   | ND2      | ASN 1436               | 2.98         |                          |              |
|           |                          |             | 6-ring | CB       |                        |              | ALA 1390                 | 4.52         |
|           |                          |             | 6-ring | 6-ring   |                        |              | TYR 1442                 | 3.65         |
| <b>25</b> | -10.10                   | 0.73        | N 12   | ND2      | ASN 1436               | 2.99         |                          |              |
|           |                          |             | 5-ring | 6-ring   |                        |              | TYR 1442                 | 3.94         |
|           |                          |             | 6-ring | 6-ring   |                        |              | TYR 1442                 | 3.90         |
| <b>26</b> | -10.74                   | 1.11        | CL 21  | O        | THR 1401               | 3.42         |                          |              |
|           |                          |             | N 12   | ND2      | ASN 1436               | 2.84         |                          |              |
|           |                          |             | 5-ring | 6-ring   |                        |              | TYR 1442                 | 3.90         |
|           |                          |             | 6-ring | 6-ring   |                        |              | TYR 1442                 | 3.80         |
| <b>27</b> | -10.07                   | 0.92        | N 12   | ND2      | ASN 1436               | 3.45         |                          |              |
|           |                          |             | 5-ring | 6-ring   |                        |              | TYR 1442                 | 3.84         |
|           |                          |             | 6-ring | 6-ring   |                        |              | TYR 1442                 | 3.78         |
| <b>28</b> | -9.79                    | 0.80        | C 15   | SG       | CYS 1432               | 3.76         |                          |              |
|           |                          |             | N 17   | ND2      | ASN 1436               | 2.71         |                          |              |
| <b>29</b> | -11.556                  | 1.162       | N 12   | ND2      | ASN 1436               | 3.11         |                          |              |
|           |                          |             | 6-ring | 6-ring   |                        |              | TYR 1442                 | 3.98         |
| <b>30</b> | -10.02                   | 1.20        | C 20   | 6-ring   |                        |              | TYR 1442                 | 3.74         |
|           |                          |             |        | 6-ring   |                        |              | TRP 1379                 | 4.15         |
| <b>31</b> | -9.53                    | 1.06        | N 12   | ND2      | ASN 1436               | 2.93         |                          |              |
|           |                          |             | 5-ring | 6-ring   |                        |              | TYR 1442                 | 3.76         |
|           |                          |             | 6-ring | 6-ring   |                        |              | TYR 1442                 | 3.75         |
| <b>32</b> | -9.55                    | 0.89        | CL 23  | O        | THR 1401               | 3.44         |                          |              |

| Comp.     | $\Delta G$<br>(kcal/mol) | RMSD<br>(Å) | Ligand | Receptor | H-bonding interactions |              | Hydrophobic interactions |              |
|-----------|--------------------------|-------------|--------|----------|------------------------|--------------|--------------------------|--------------|
|           |                          |             |        |          | Residue                | Distance (Å) | Residue                  | Distance (Å) |
|           |                          |             | N 12   | ND2      | ASN 1436               | 2.85         |                          |              |
|           |                          |             | 5-ring | 6-ring   |                        |              | TYR 1442                 | 3.91         |
|           |                          |             | 6-ring | 6-ring   |                        |              | TYR 1442                 | 3.79         |
| <b>33</b> | -10.80                   | 0.99        | N 12   | ND2      | ASN 1436               | 2.85         |                          |              |
|           |                          |             | 5-ring | 6-ring   |                        |              | TYR 1442                 | 3.96         |
|           |                          |             | 6-ring | 6-ring   |                        |              | TYR 1442                 | 3.75         |
| <b>34</b> | -9.78                    | 1.16        | CL 23  | O        | THR 1401               | 3.42         |                          |              |
|           |                          |             | N 12   | ND2      | ASN 1436               | 2.87         |                          |              |
|           |                          |             | 5-ring | 6-ring   |                        |              | TYR 1442                 | 3.95         |
|           |                          |             | 6-ring | 6-ring   |                        |              | TYR 1442                 | 3.75         |
| <b>35</b> | -9.89                    | 1.10        | N 14   | OE1      | GLU 1389               | 2.97         |                          |              |
| <b>36</b> | -9.92                    | 1.19        | 6-ring | 6-ring   |                        |              | TYR 1442                 | 3.93         |

## Predicted binding mode of I-45 redocked

Score -11.5259777

RMSD 0.957672298

### Ligand Interactions Report

5TPX: TRANSFERASE / 5TPX: TRANSFERASE

Ligand Receptor Interaction Distance E (kcal/mol)

C14 1 O PRO 1384 (A) H-donor 3.38 -0.7

N5 5 OE1 GLU 1389 (A) H-donor 3.32 -0.9

N5 5 OE2 GLU 1389 (A) H-donor 2.72 -16.6

N4 45 ND2 ASN 1436 (A) H-acceptor 2.88 -2.5

N5 5 OE1 GLU 1389 (A) ionic 3.32 -2.6

N5 5 OE2 GLU 1389 (A) ionic 2.72 -6.6

6-ring 6-ring TYR 1442 (A) pi-pi 3.67 -0.0

5TPX: TRANSFERASE / 5TPX

Ligand Receptor Interaction Distance E (kcal/mol)

6-ring 6-ring TYR 1442 (A) pi-pi 3.84 -0.0

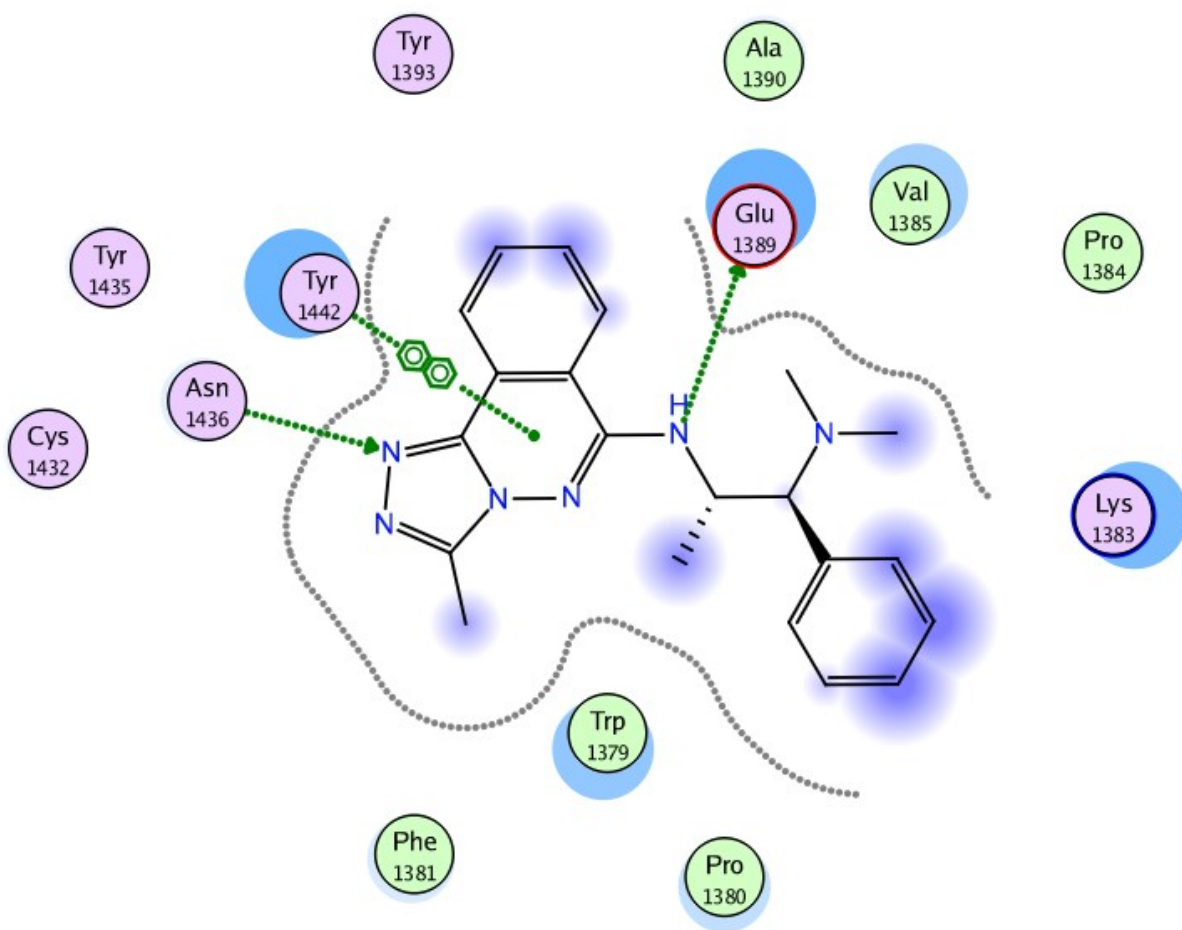



Entry: 1/8  
mol:

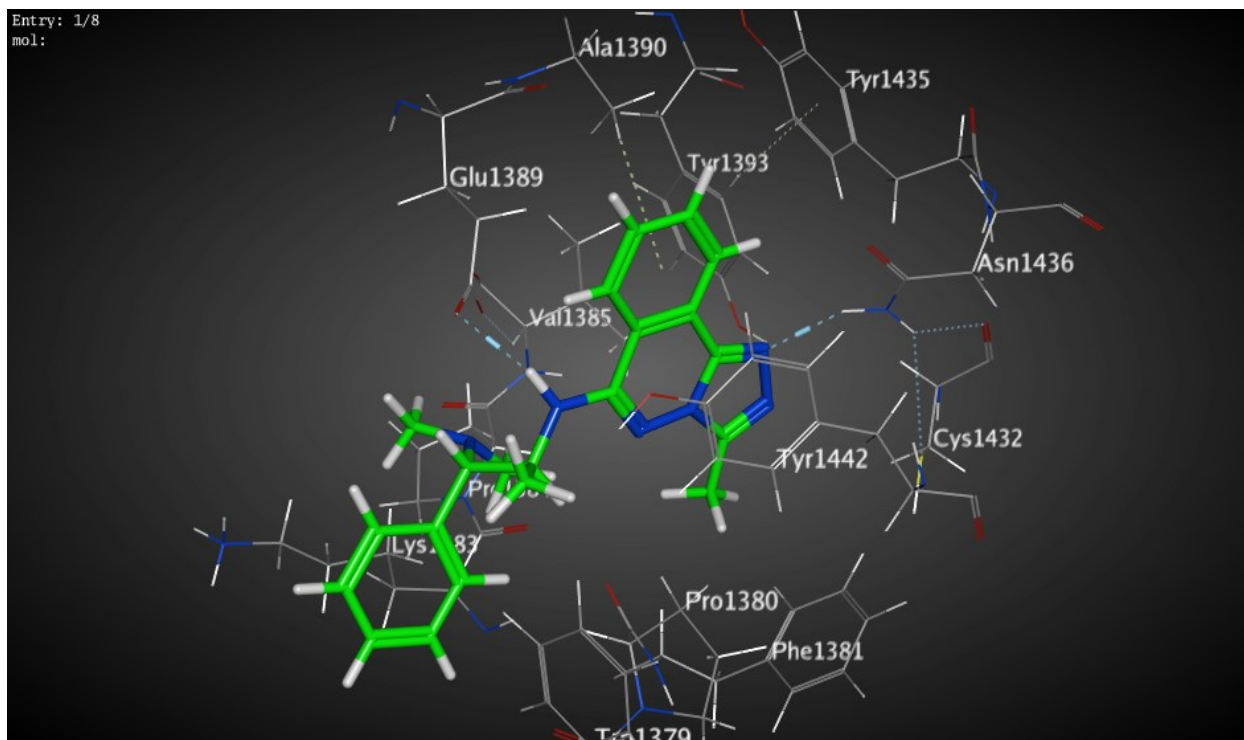

Entry: 3/8  
mol:

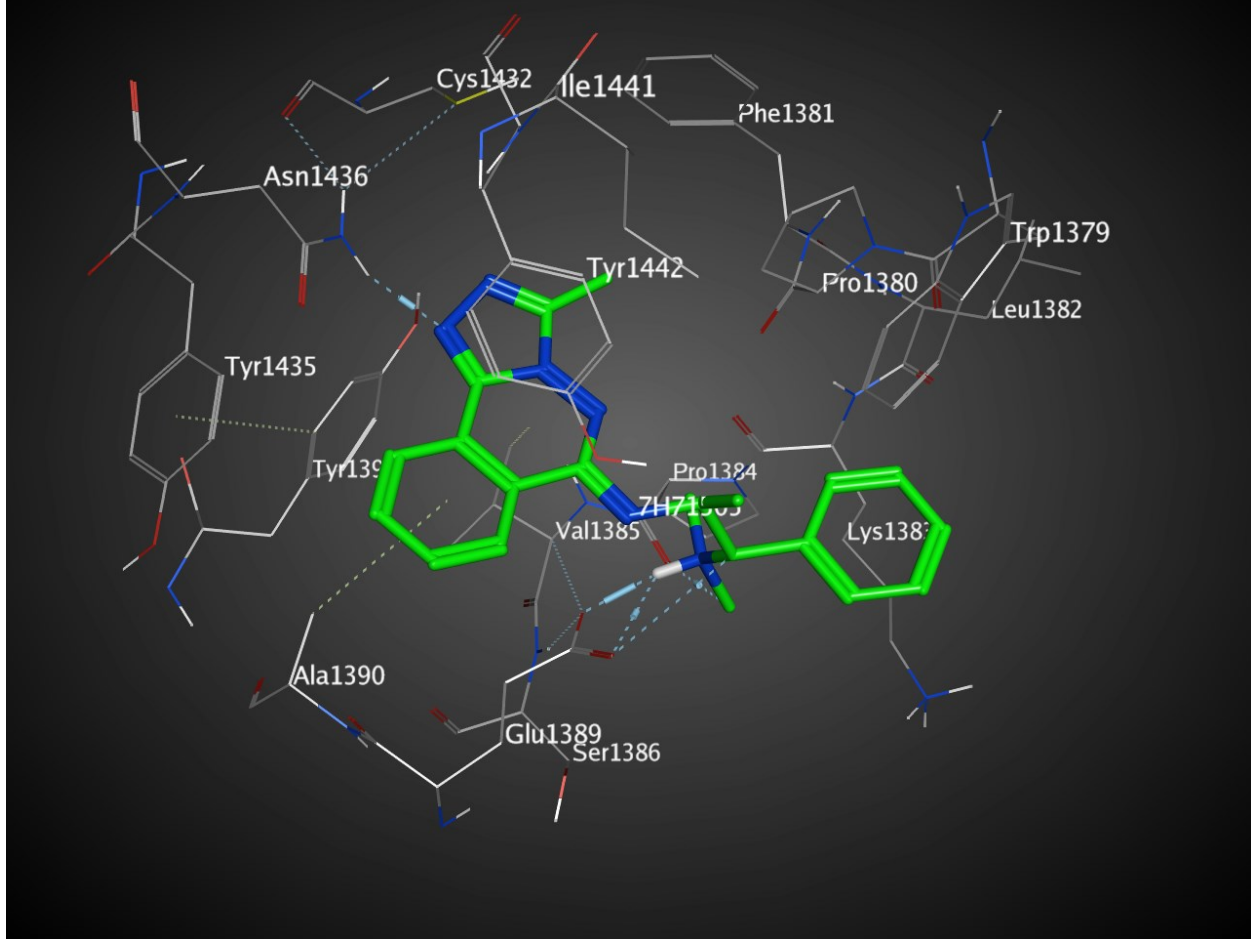

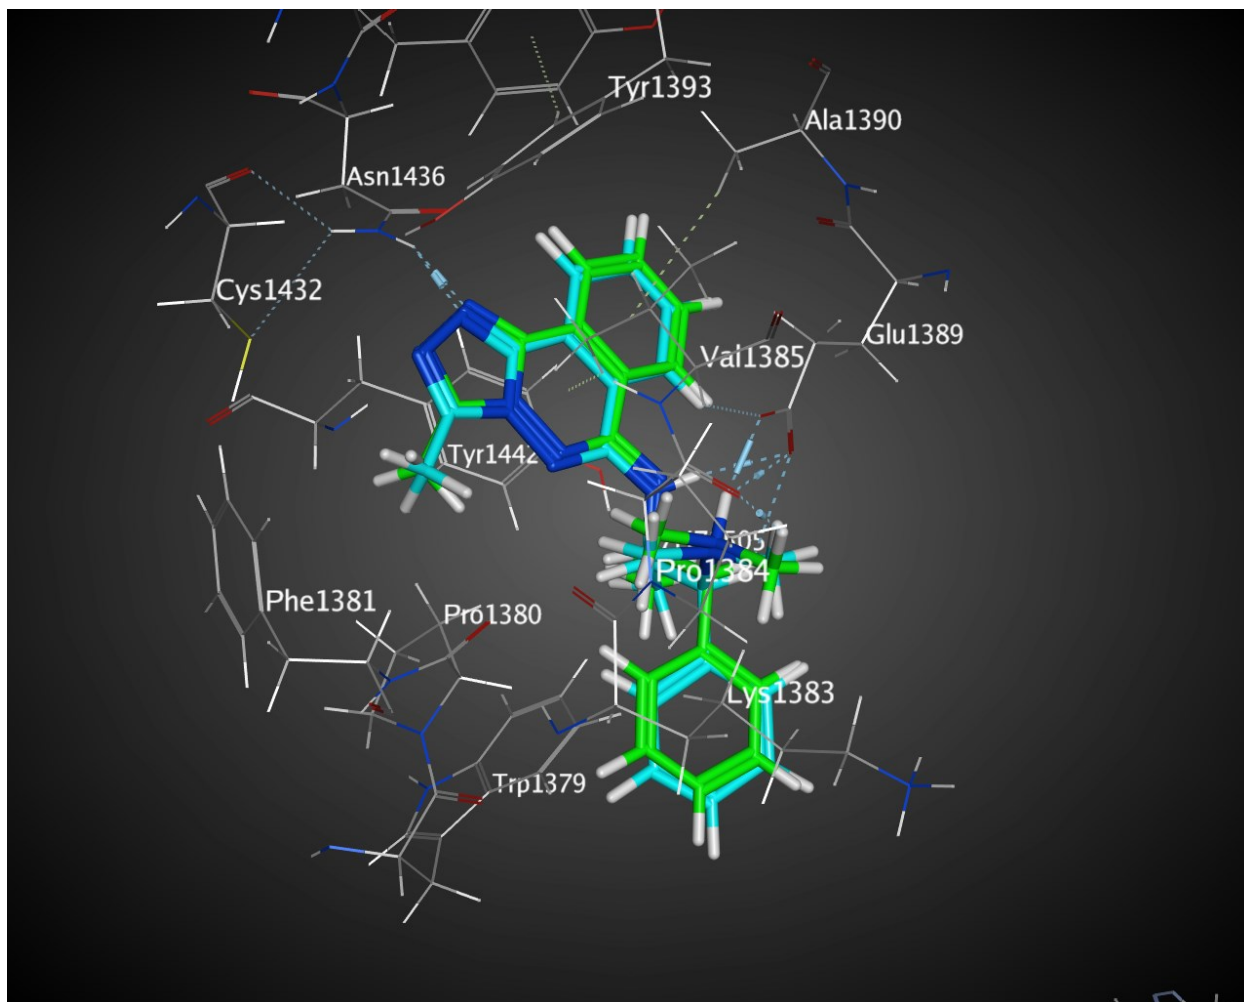

Superimposition of the co-crystallized ligand and L-45 redocked

## Predicted binding mode of 21

Score -10.15808037    RMSD 0.980336607

Ligand Interactions Report

5TPX: TRANSFERASE / 5TPX

Ligand Receptor Interaction Distance E (kcal/mol)

N 13 ND2 ASN 1436 (A) H-acceptor 3.31 -0.8

6-ring 6-ring TYR 1442 (A) pi-pi 3.62 -0.0

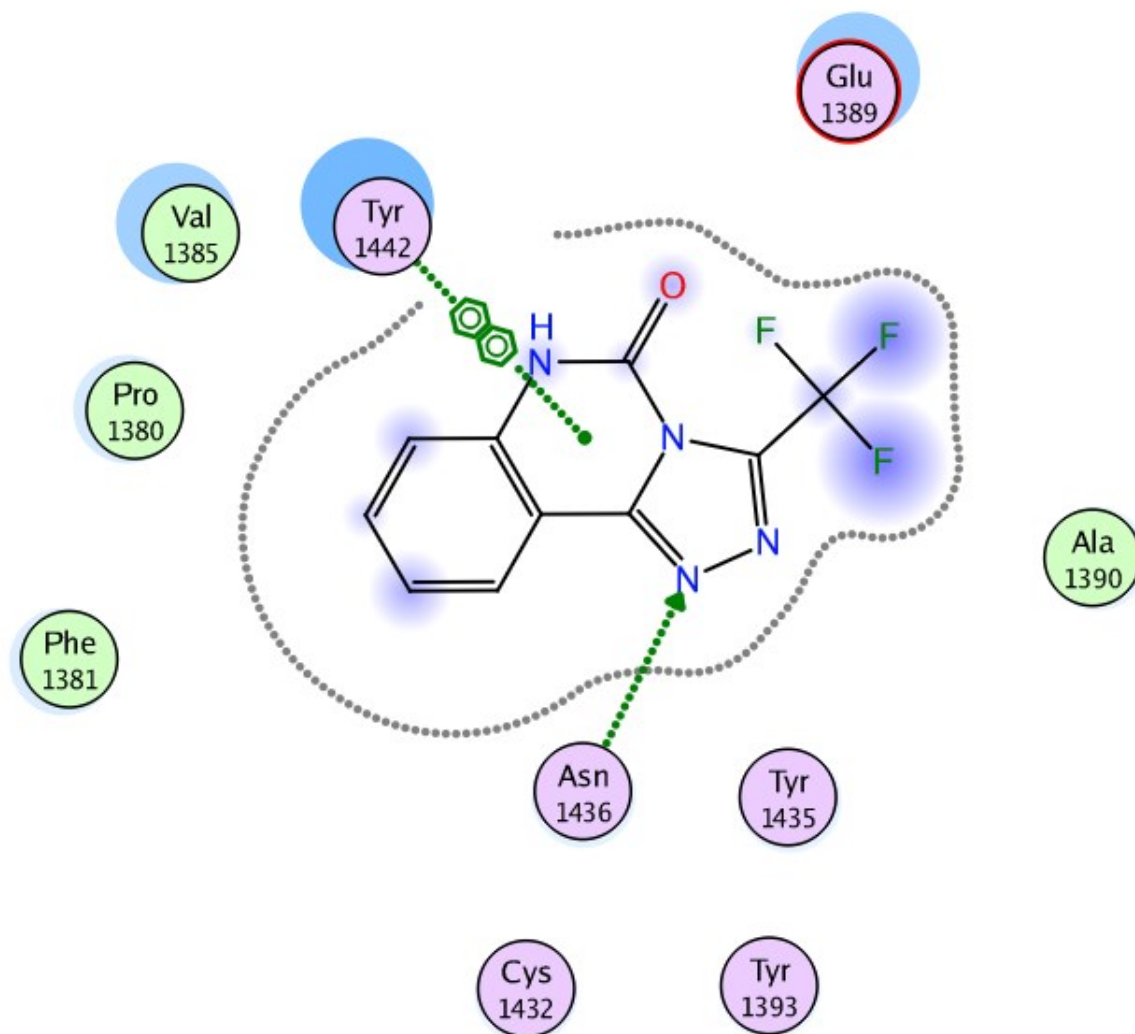

Entry: 3/7  
mol:

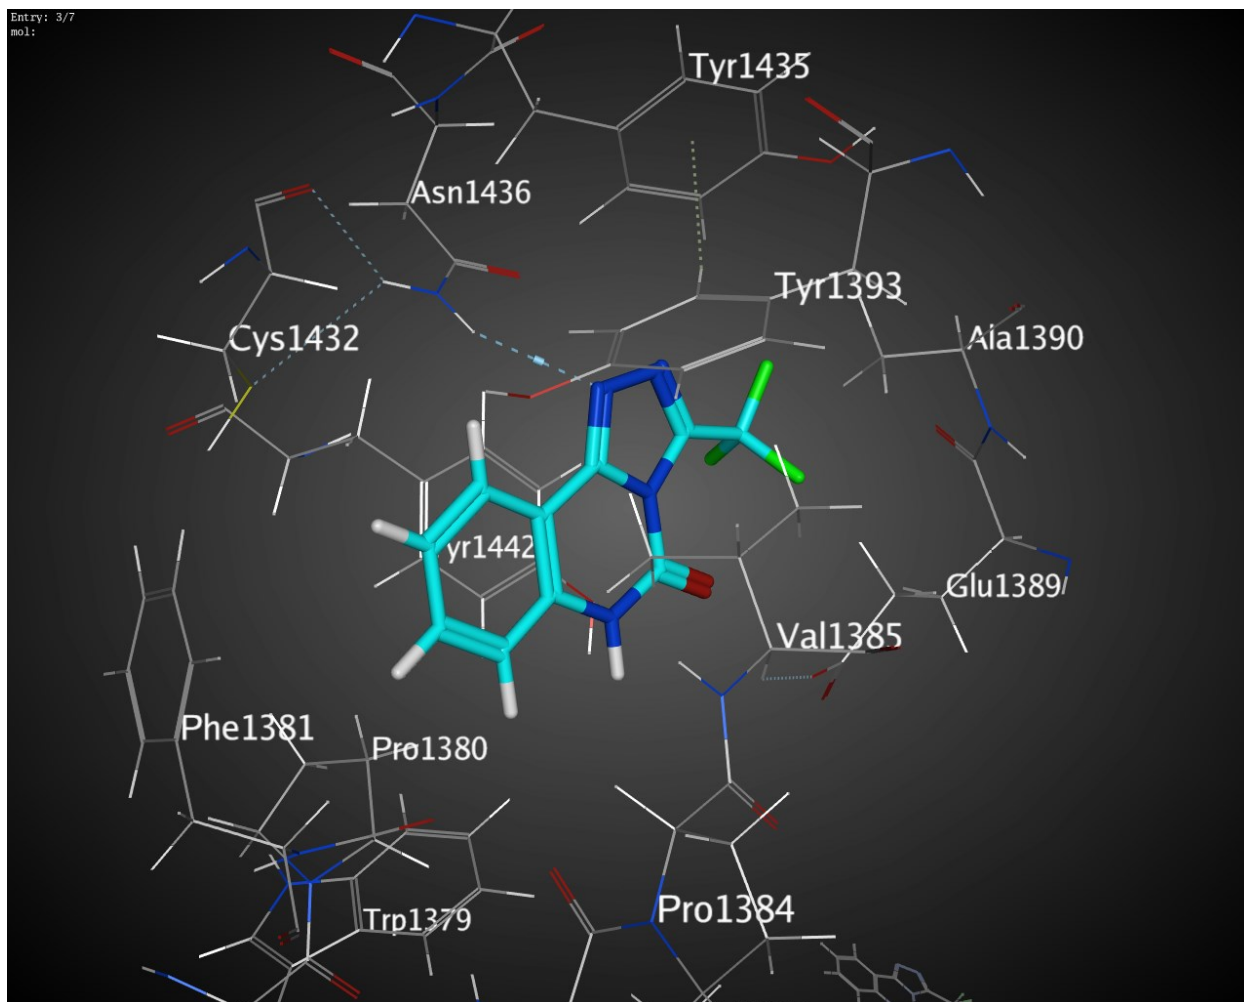

## Predicted binding mode of 22

Score -10.1240214

RMSD 1.19

Ligand Interactions Report

5TPX: TRANSFERASE / 5TPX

Ligand Receptor Interaction Distance E (kcal/mol)

6-ring CZ3 TRP 1379 (A) pi-H 4.10 -0.7

6-ring CZ3 TRP 1379 (A) pi-H 4.34 -0.7

6-ring CG2 VAL 1385 (A) pi-H 3.60 -0.6

6-ring 6-ring TYR 1442 (A) pi-pi 3.77 -0.0

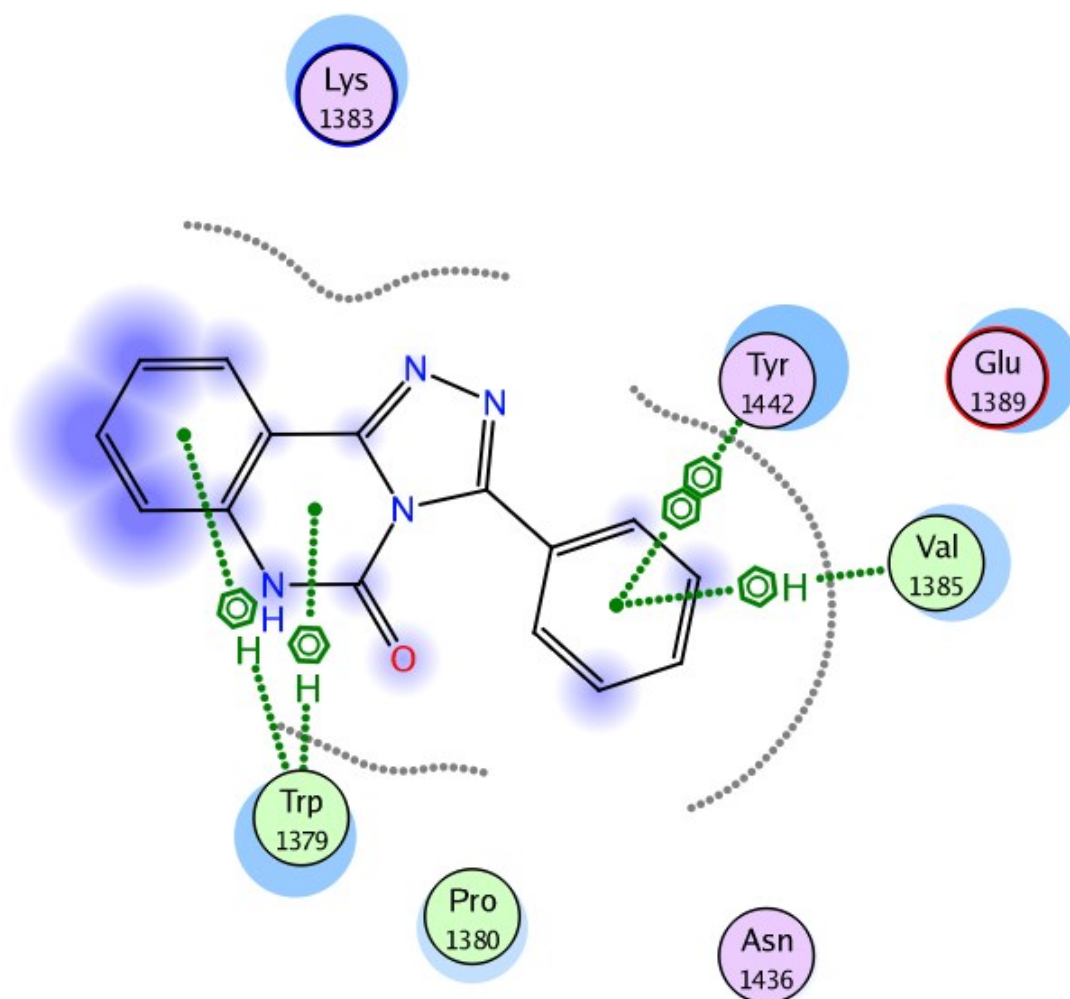

Entry: 7/9  
mol:

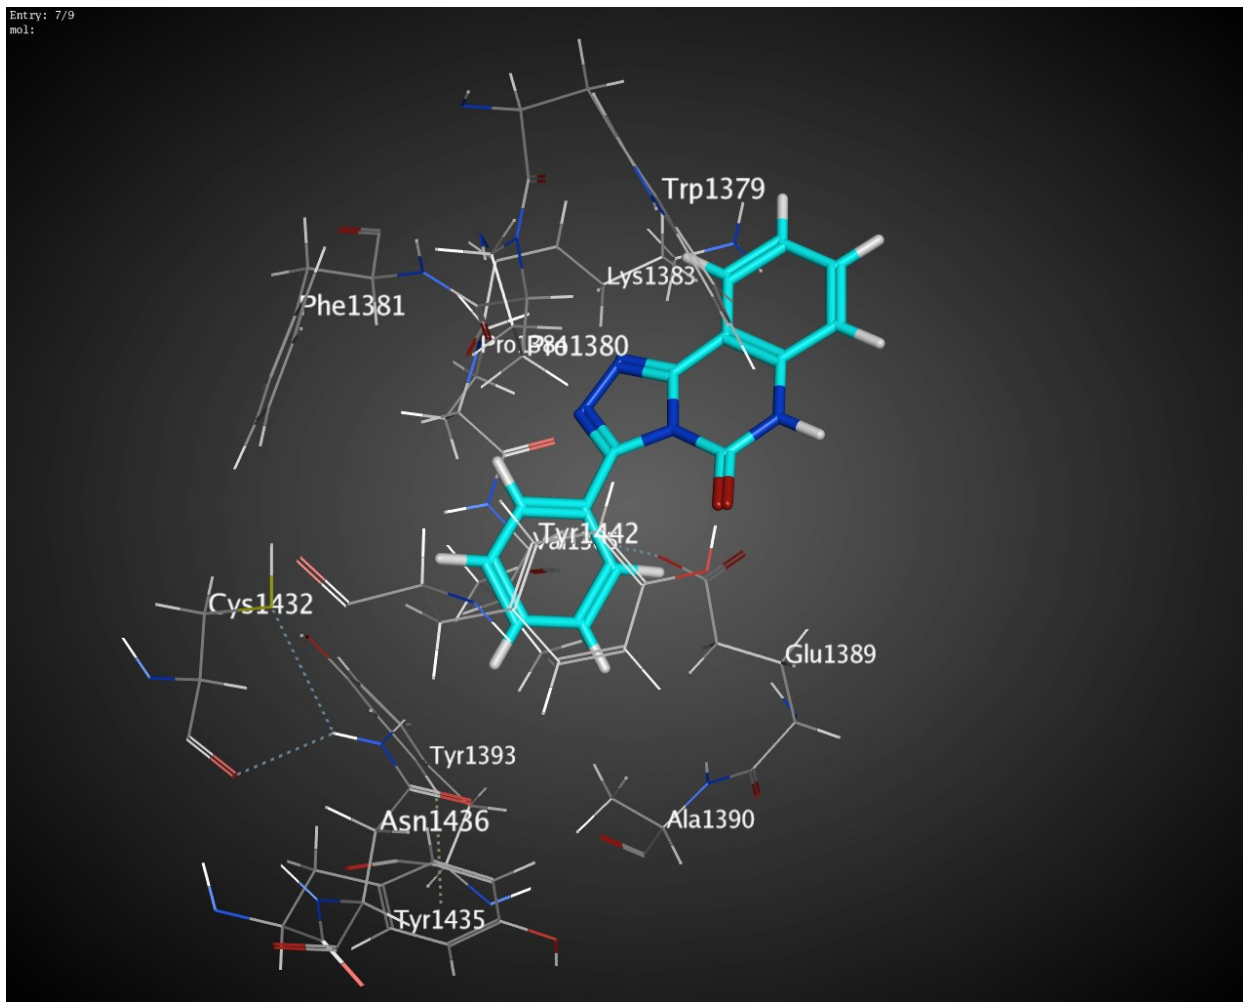

### Predicted binding mode of 23

Score -10.9885861                      RMSD 1.00

Ligand Interactions Report

5TPX: TRANSFERASE / 5TPX

Ligand Receptor Interaction Distance E (kcal/mol)

N 7 OE1 GLU 1389 (A) H-donor 3.09 -0.8

CL 21 O THR 1401 (A) H-donor 3.24 -0.9

N 12 ND2 ASN 1436 (A) H-acceptor 2.84 -2.7

5-ring 6-ring TYR 1442 (A) pi-pi 3.85 -0.0

6-ring 6-ring TYR 1442 (A) pi-pi 3.84 -0.0



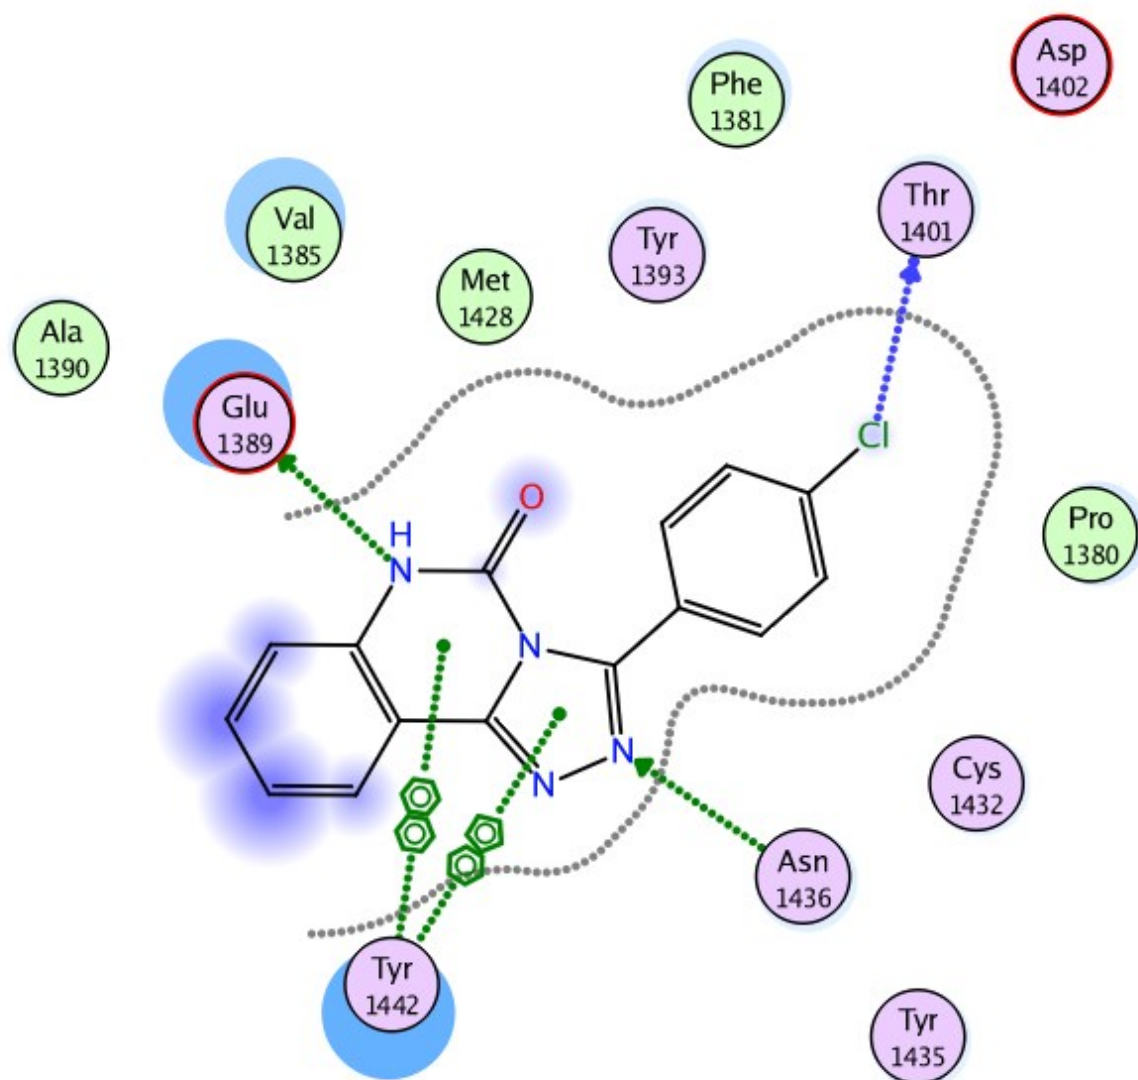

Entry: 2/9  
mol:

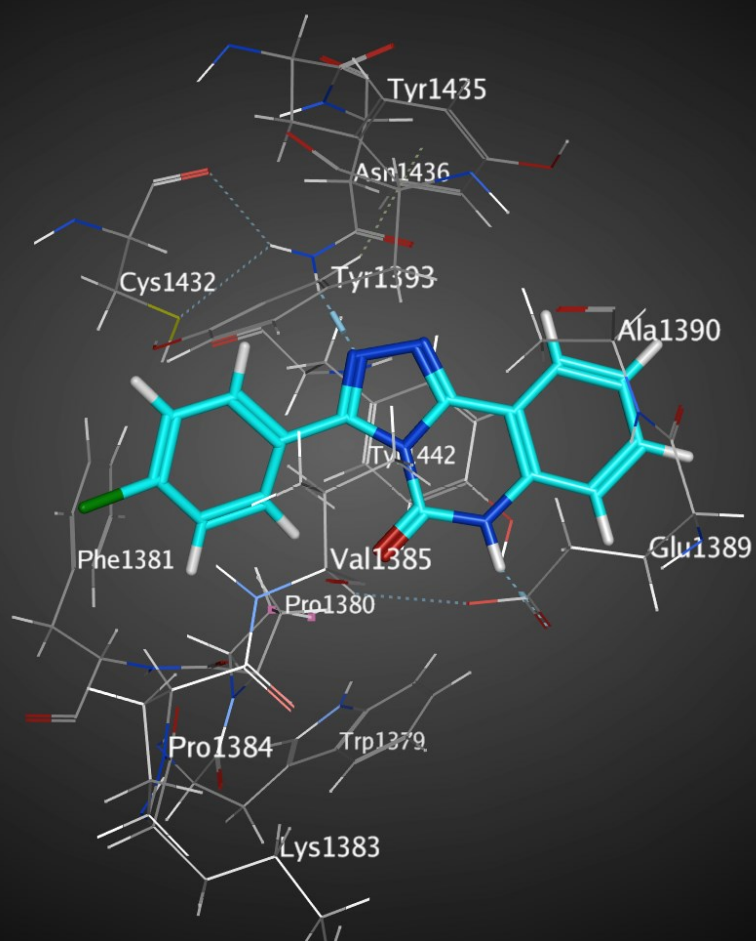

## Predicted binding mode of 24

Score -10.2610031          RMSD          1.20

Ligand Interactions Report

5TPX: TRANSFERASE / 5TPX

Ligand Receptor Interaction Distance E (kcal/mol)

CL 14 O PRO 1380 (A) H-donor 3.20 -1.0

N 13 ND2 ASN 1436 (A) H-acceptor 2.98 -1.2

6-ring CB ALA 1390 (A) pi-H 4.52 -0.6

6-ring 6-ring TYR 1442 (A) pi-pi 3.65 -0.0

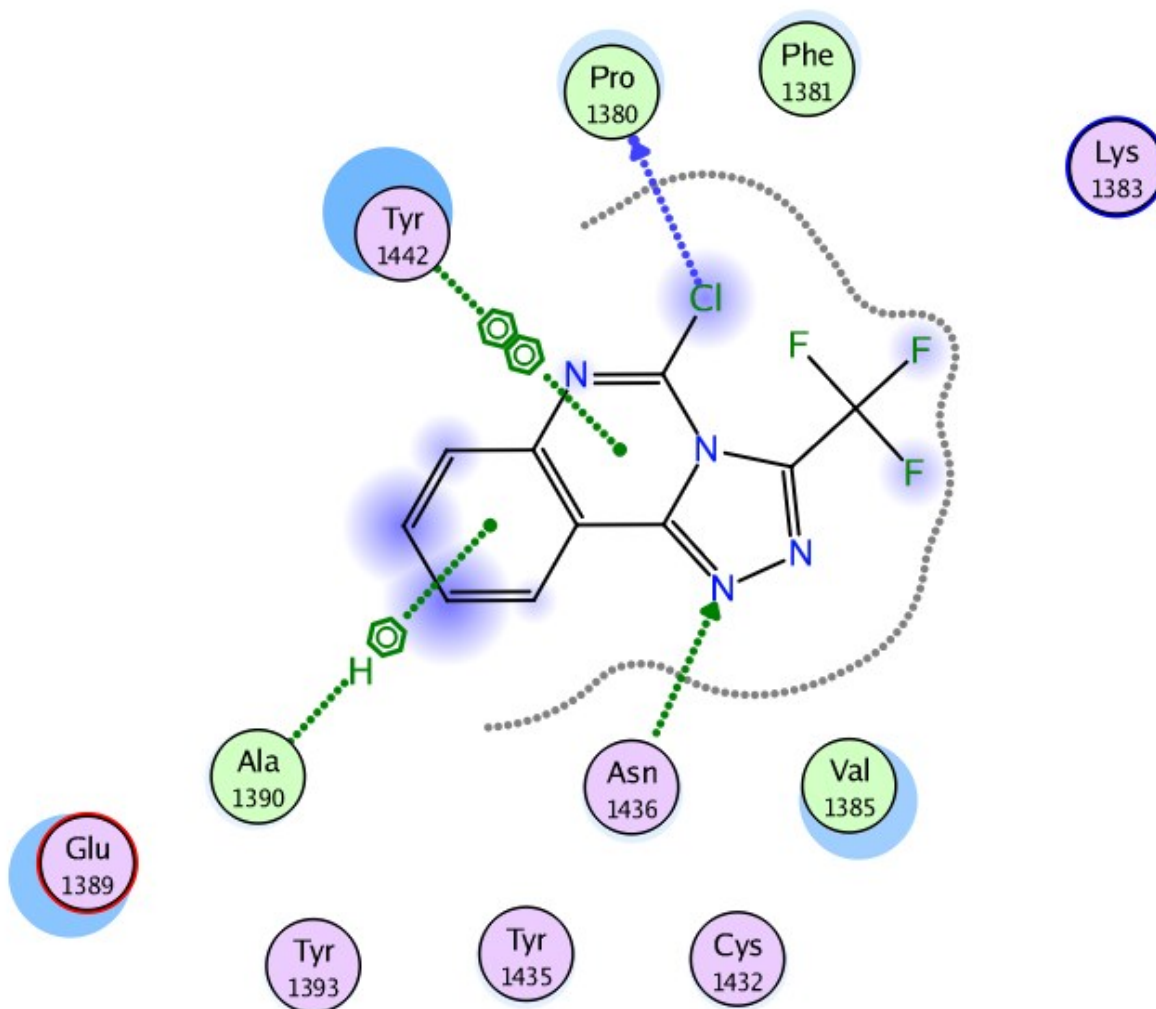

Entry: 6/12  
mol:

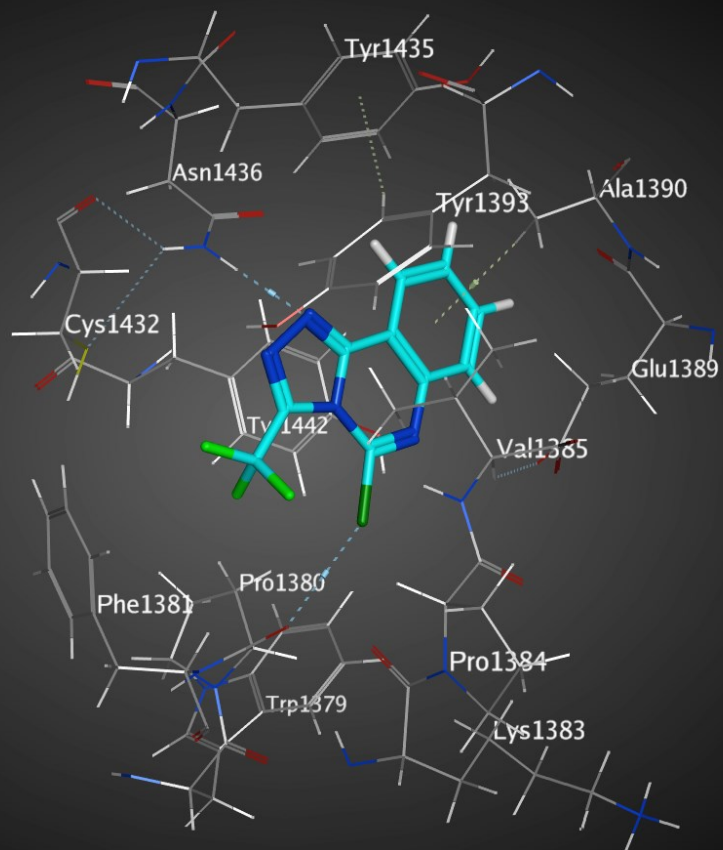

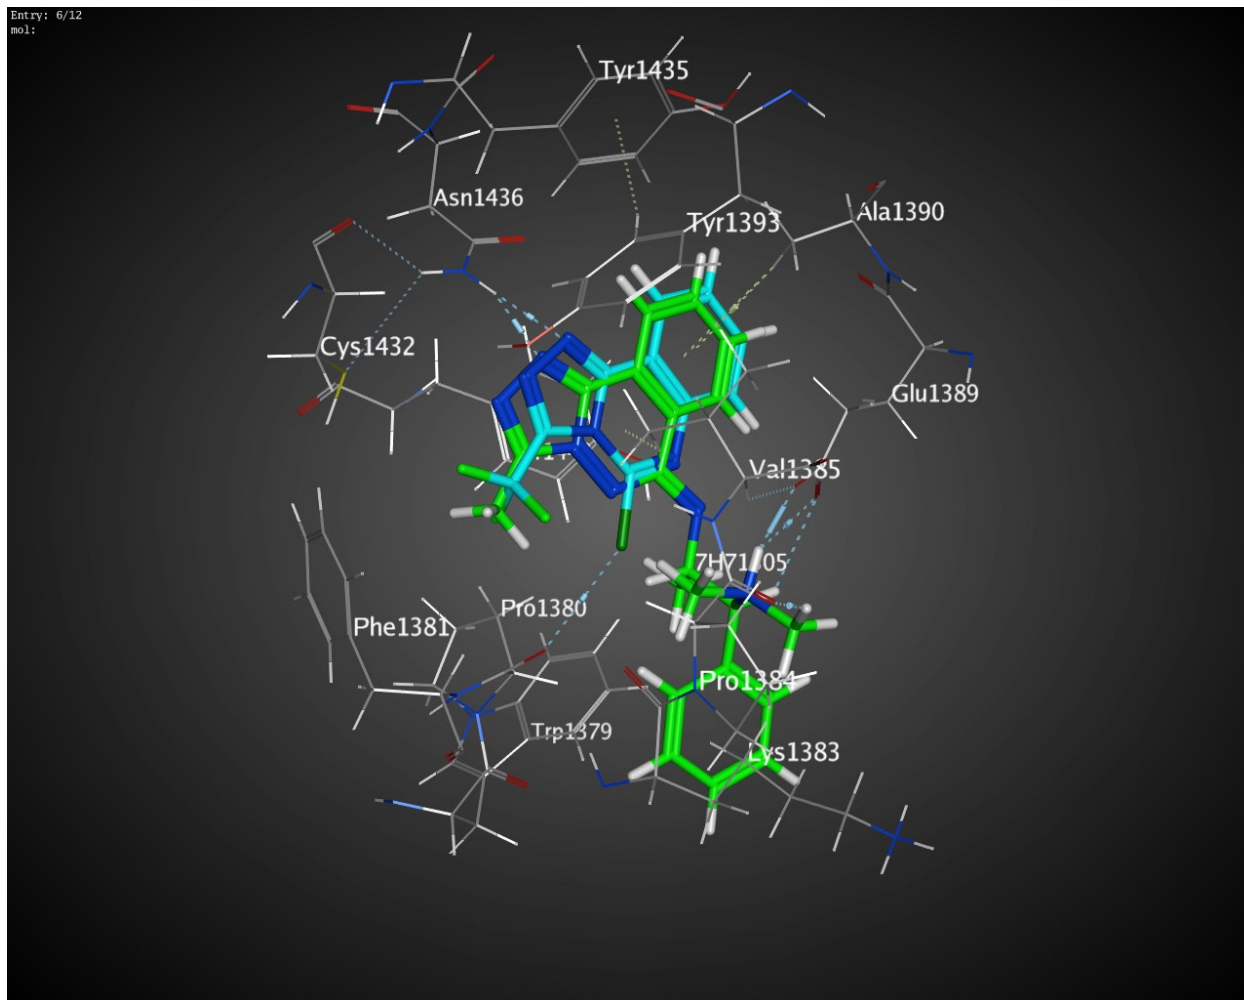

superimposition of I-45 and 24

## Predicted binding mode of 25

Score -10.1086307 RMSD 0.7342

Ligand Receptor Interaction Distance E (kcal/mol)

N 12 ND2 ASN 1436 (A) H-acceptor 2.99 -1.6

5-ring 6-ring TYR 1442 (A) pi-pi 3.94 -0.0

6-ring 6-ring TYR 1442 (A) pi-pi 3.90 -0.0

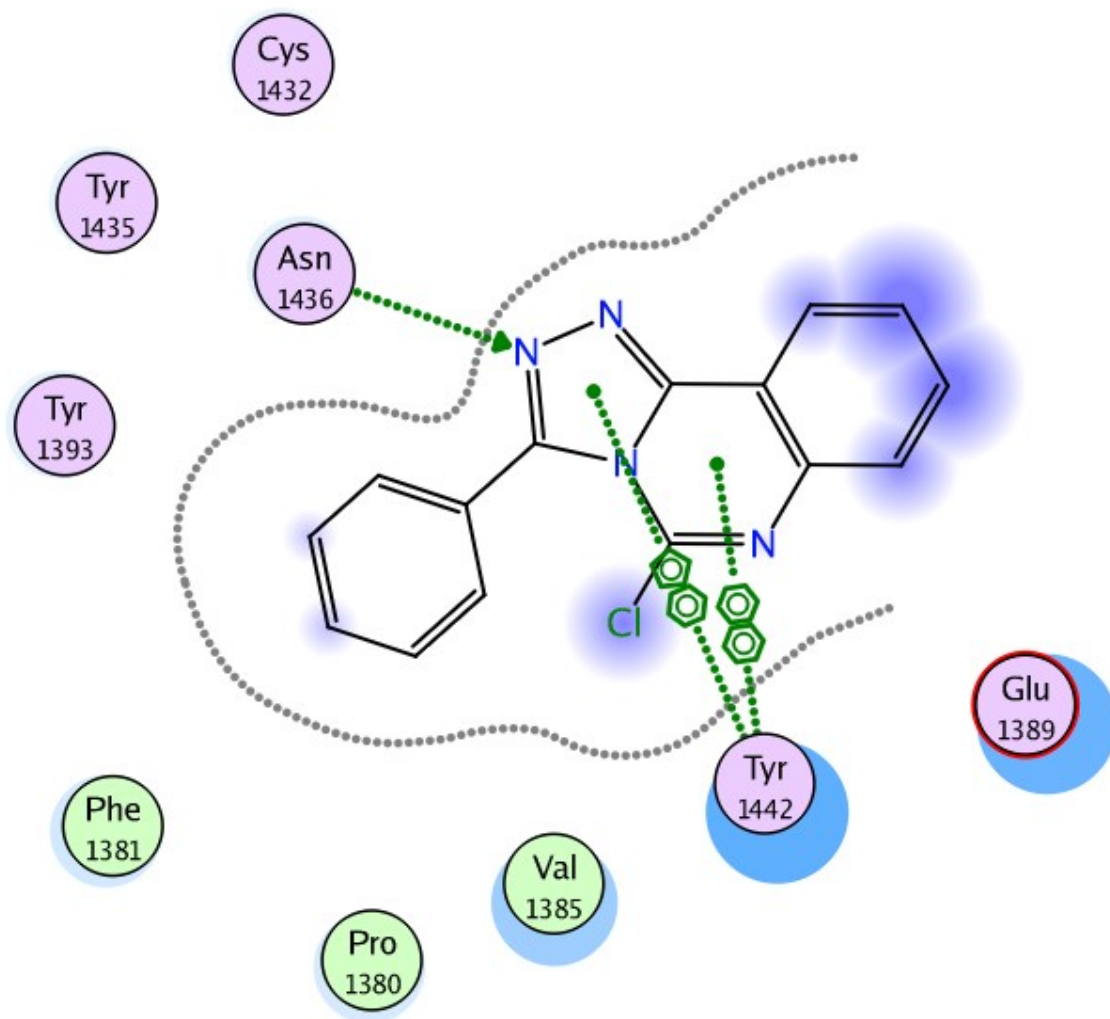

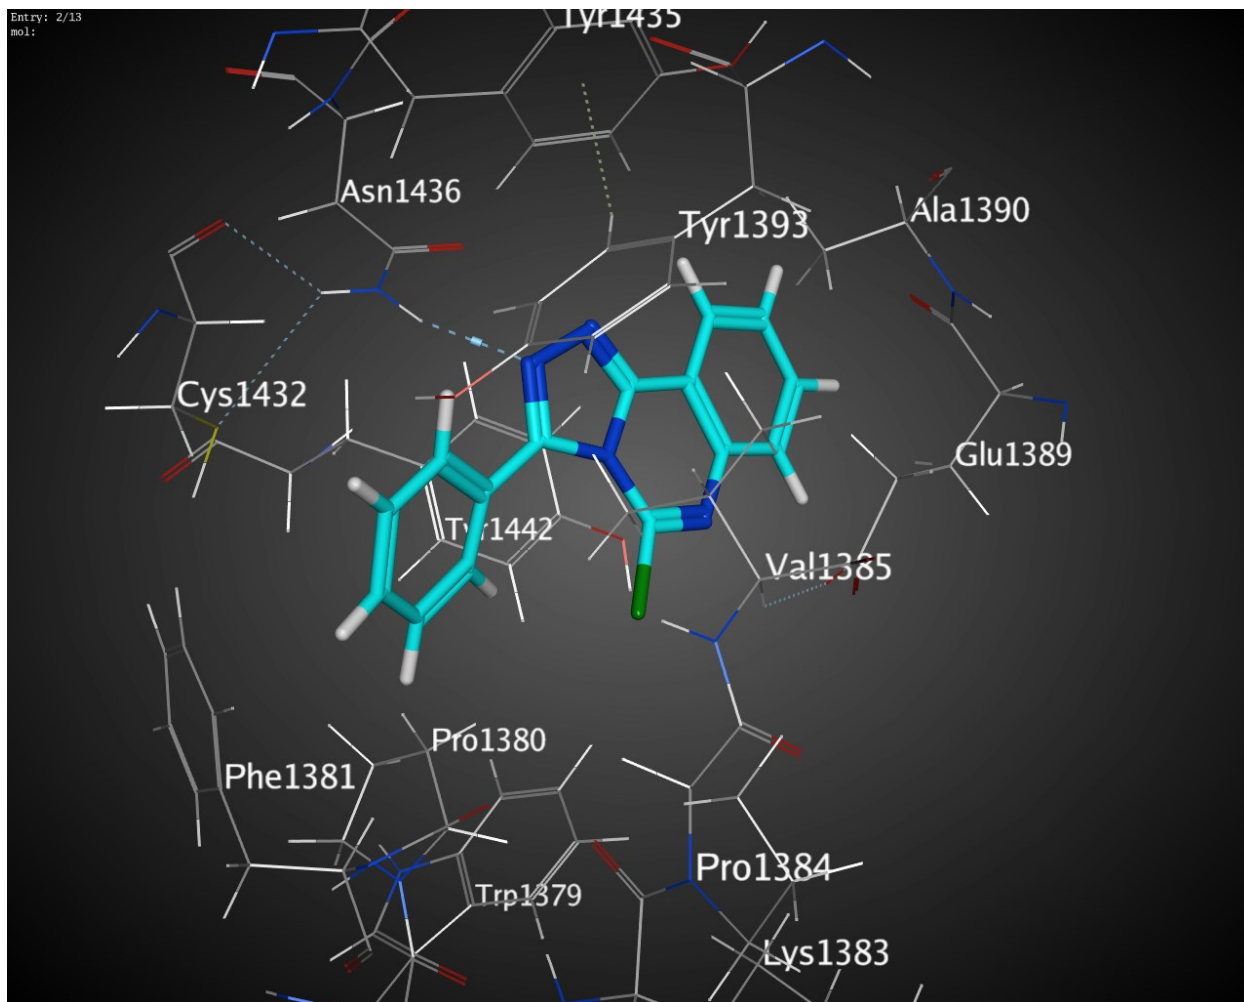

## Predicted binding mode of 26

Score -10.7440429                      RMSD                      1.118343

### Ligand Interactions Report

Ligand Receptor Interaction Distance E (kcal/mol)

CL 21 O THR 1401 (A) H-donor 3.42 -0.5

N 12 ND2 ASN 1436 (A) H-acceptor 2.84 -1.8

5-ring 6-ring TYR 1442 (A) pi-pi 3.90 -0.0

6-ring 6-ring TYR 1442 (A) pi-pi 3.80 -0.0

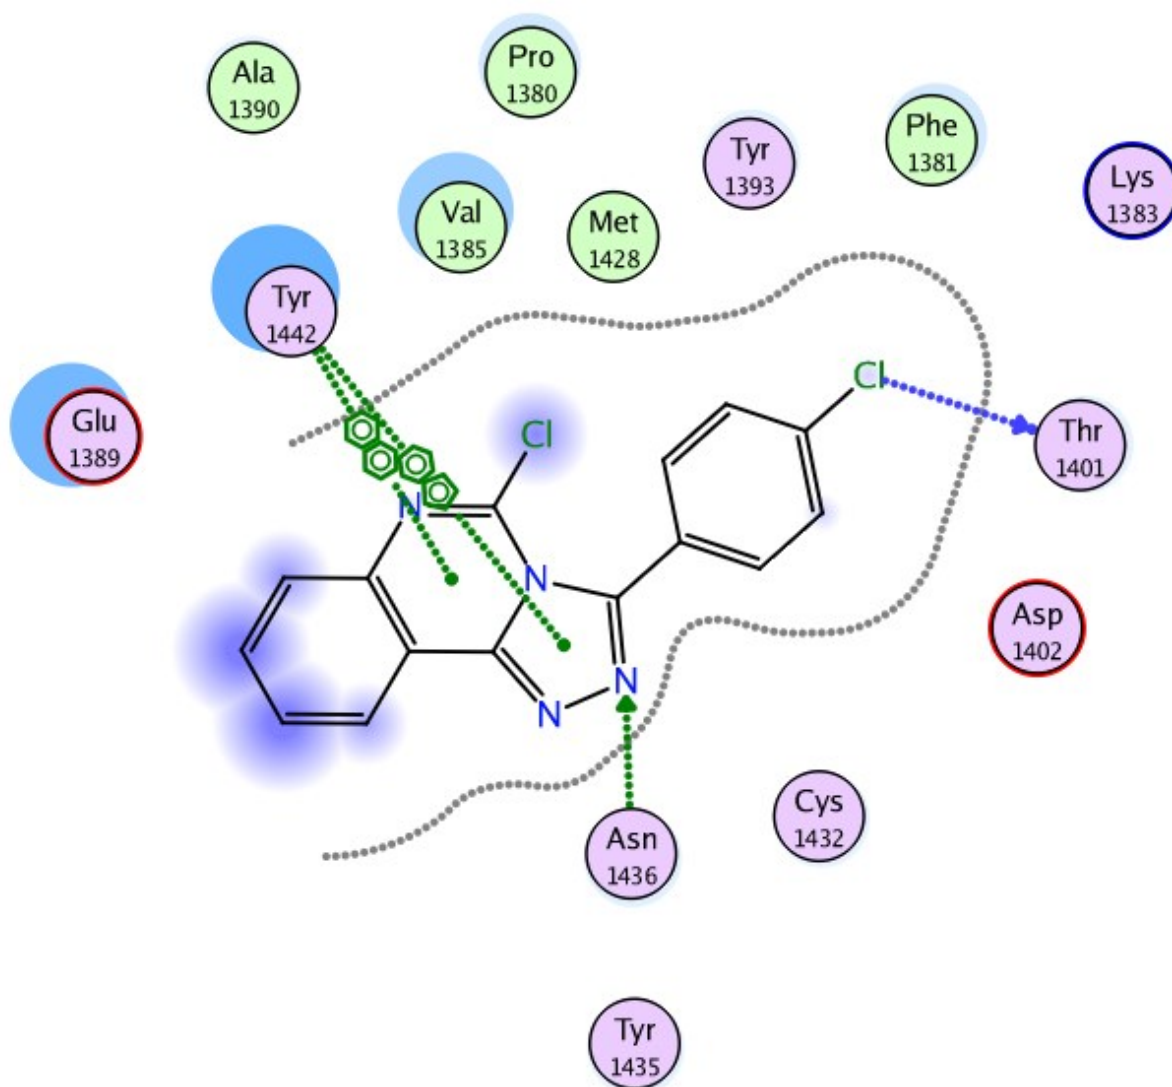



Entry: 1/11  
mol:

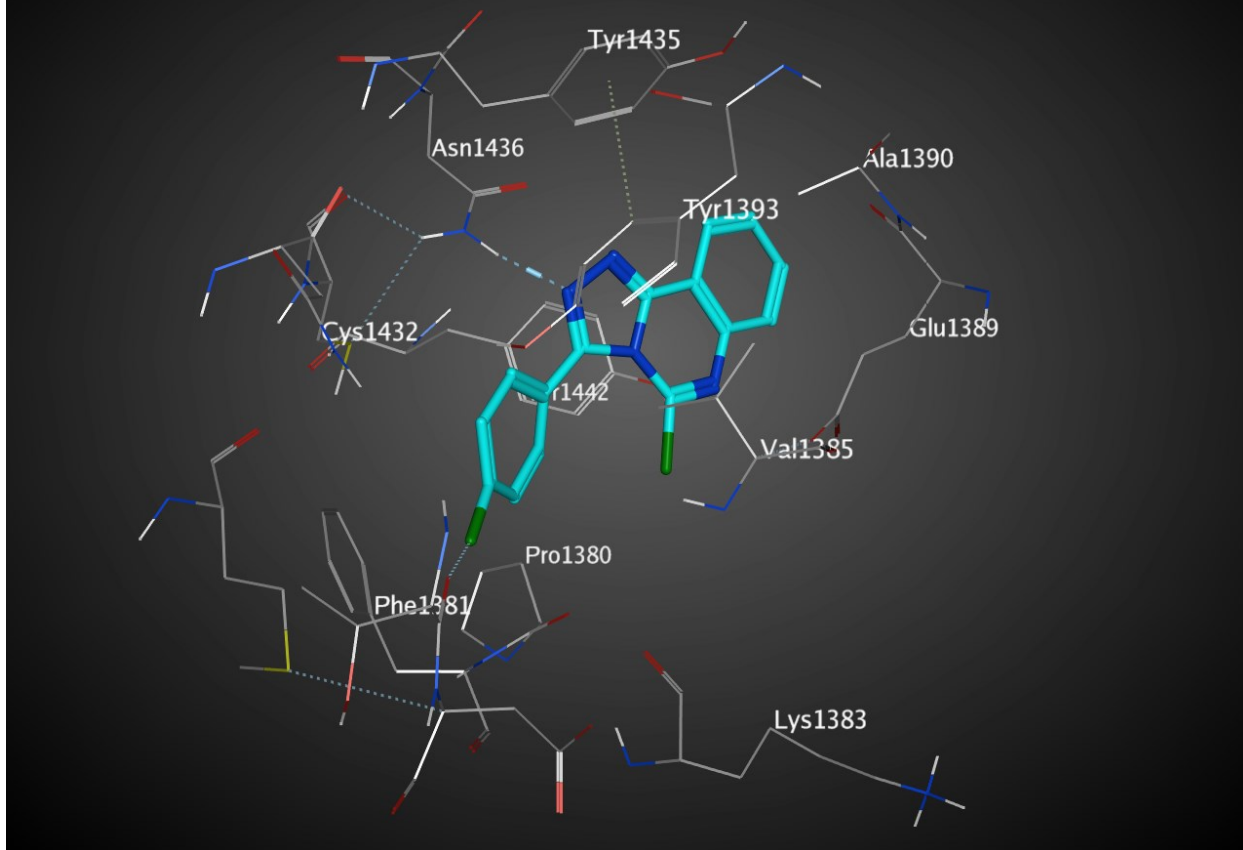

## Predicted binding mode of 27

Score -10.0714397

RMSD

0.9232

### Ligand Interactions Report

Ligand Receptor Interaction Distance E (kcal/mol)

N 13 ND2 ASN 1436 (A) H-acceptor 3.45 -0.8

5-ring 6-ring TYR 1442 (A) pi-pi 3.84 -0.0

6-ring 6-ring TYR 1442 (A) pi-pi 3.78 -0.0

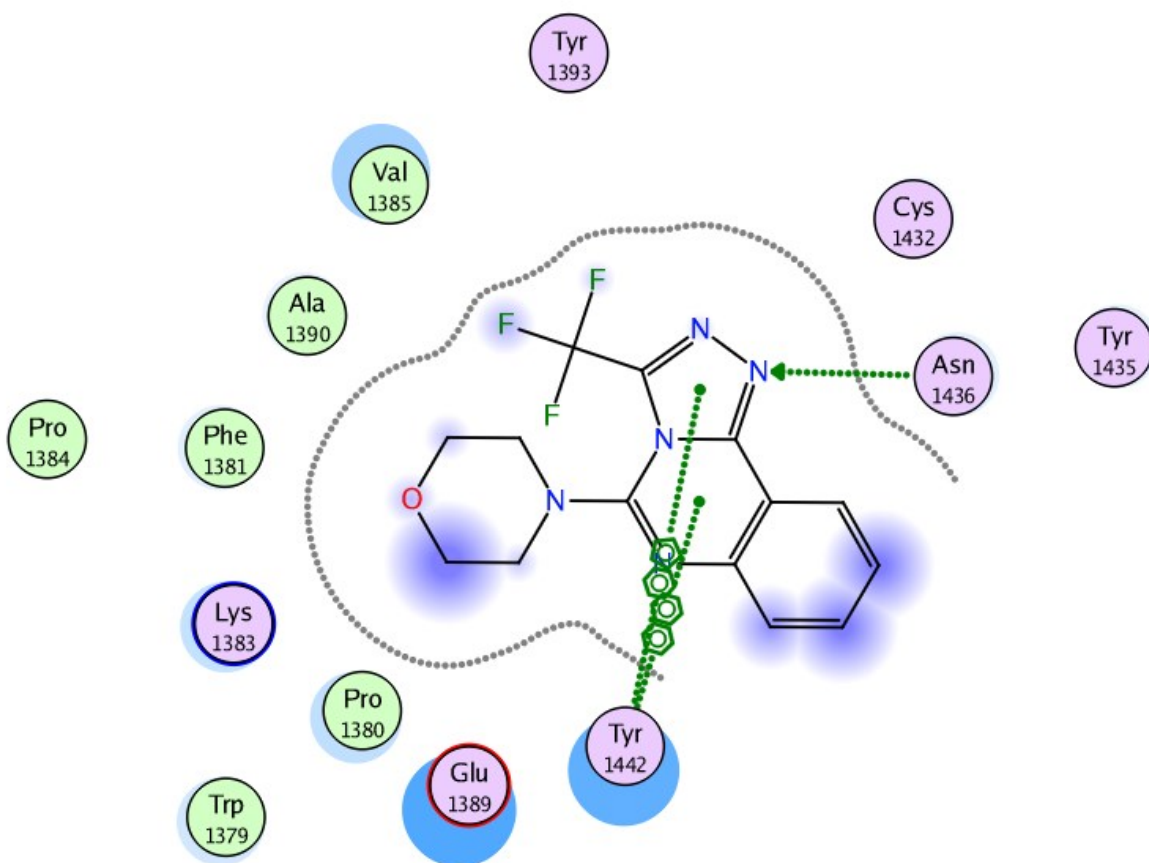

Entry: 5/9  
mol:

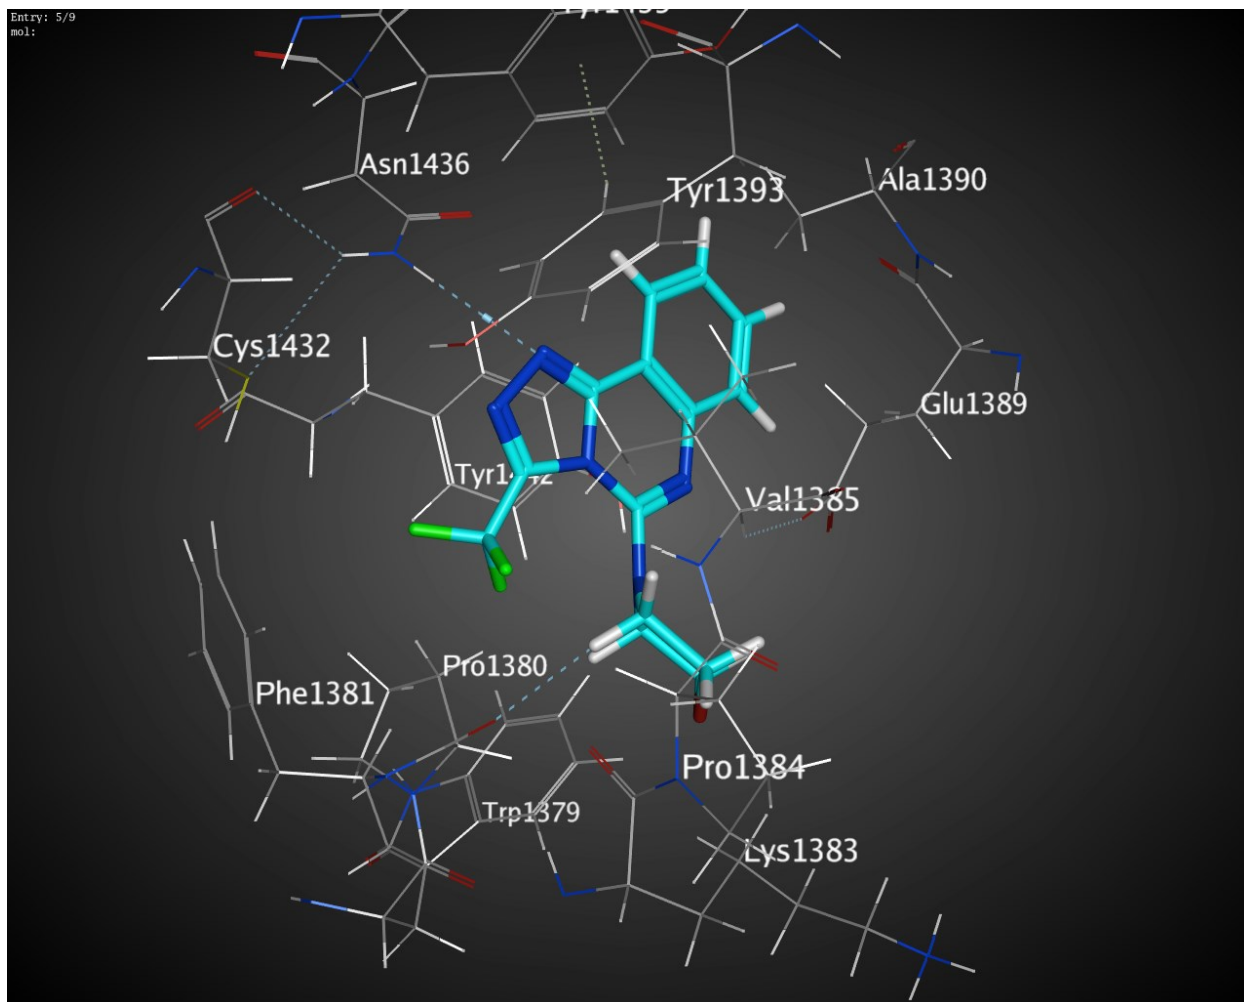

## Predicted binding mode of 28

Score -9.7896881

RMSD 0.8089

Ligand Interactions Report

Ligand Receptor Interaction Distance E (kcal/mol)

C 15 SG CYS 1432 (A) H-donor 3.76 -0.7

N 17 ND2 ASN 1436 (A) H-acceptor 2.71 -3.9

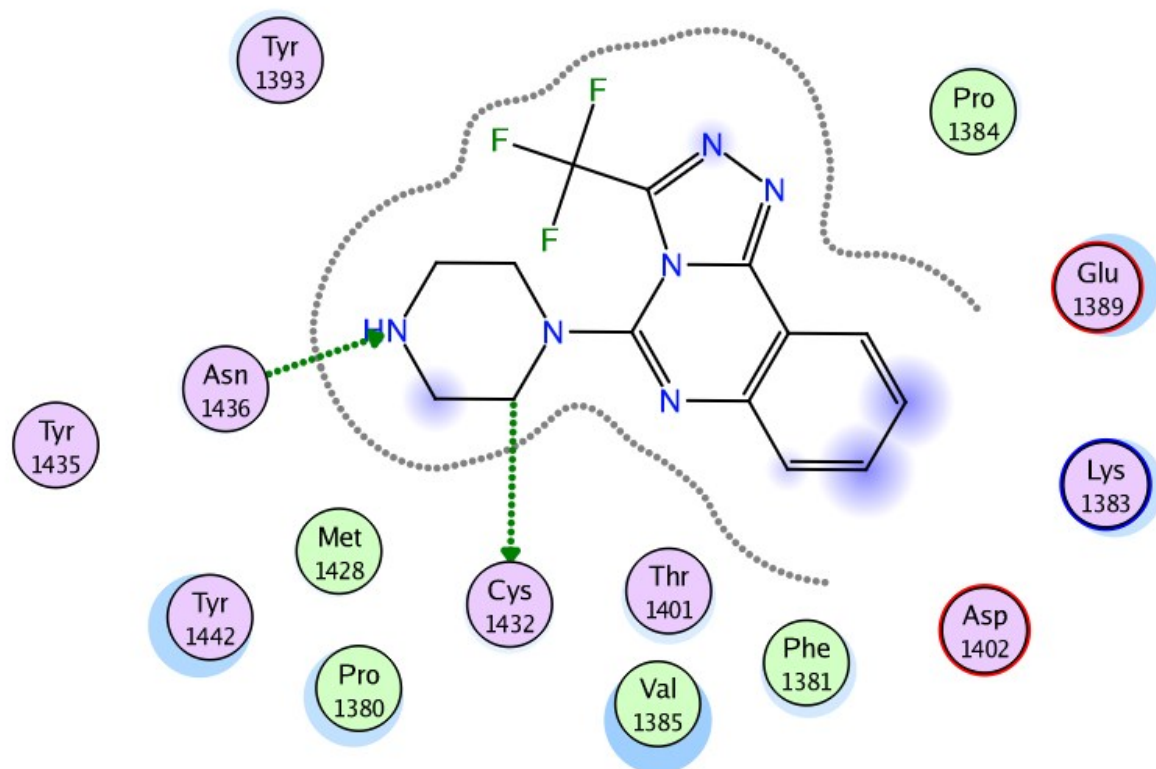

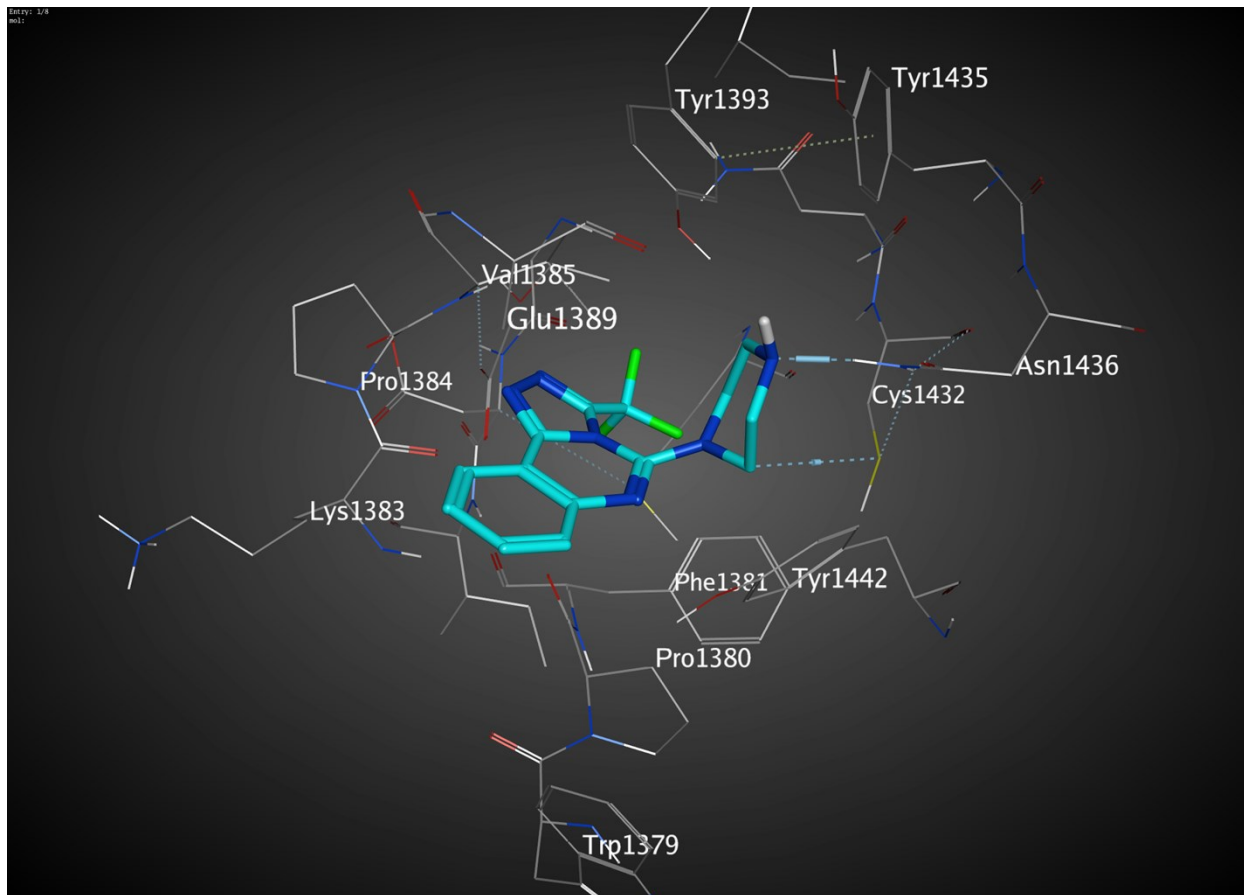

## Predicted binding mode of 29

Score -11.5561466      RMSD 1.1623

Ligand Interactions Report

Ligand Receptor Interaction Distance E (kcal/mol)

N 12 ND2 ASN 1436 (A) H-acceptor 3.11 -1.0

6-ring 6-ring TYR 1442 (A) pi-pi 3.98 -0.0

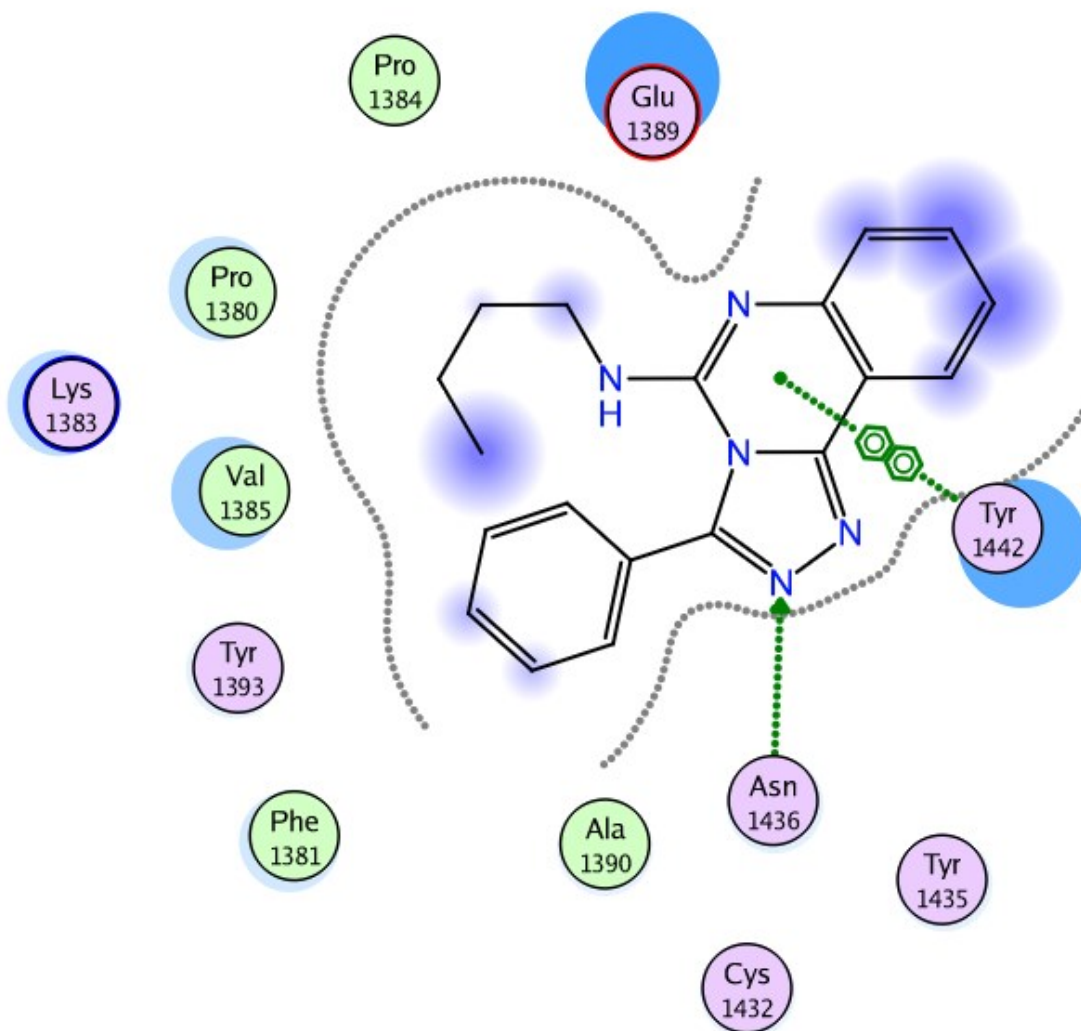

Entry: 4/15  
mol:

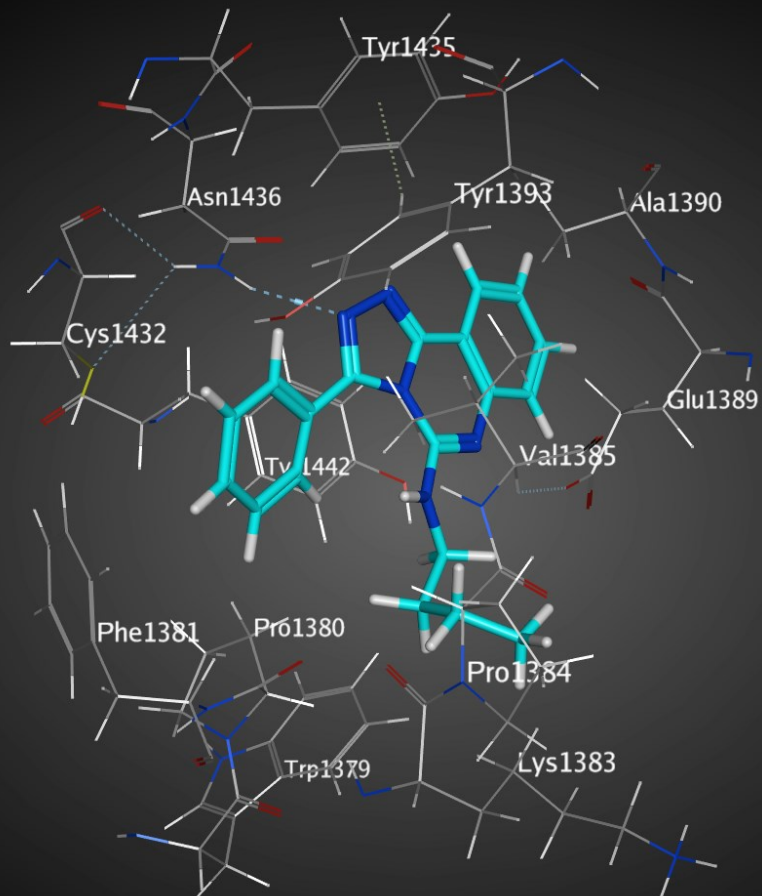

## Predicted binding mode of 30

Score -10.0245259

RMSD 1.2001

### Ligand Interactions Report

Ligand Receptor Interaction Distance E (kcal/mol)

C 20 6-ring TYR 1442 (A) H-pi 3.74 -0.9

6-ring CZ3 TRP 1379 (A) pi-H 4.15 -0.7

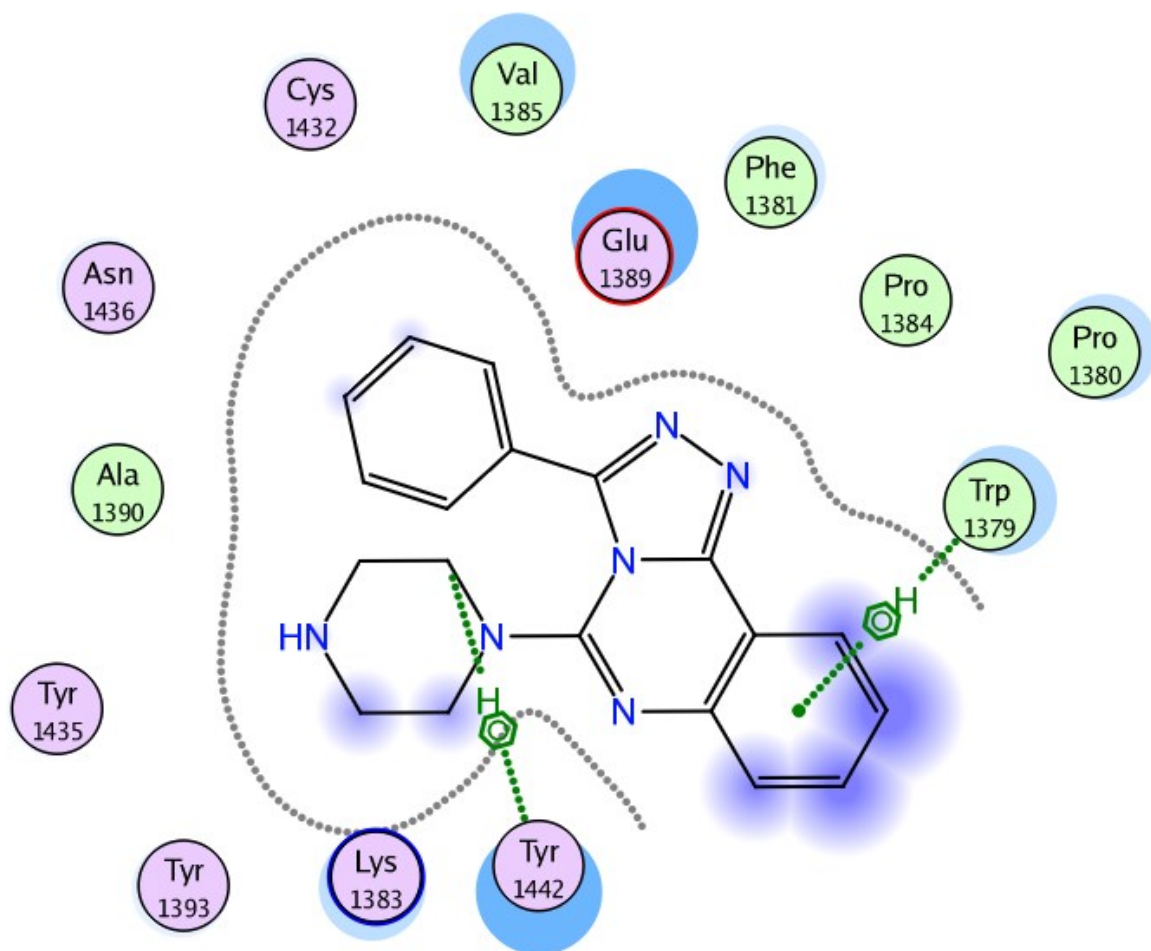



Entry: 1/14  
mol:

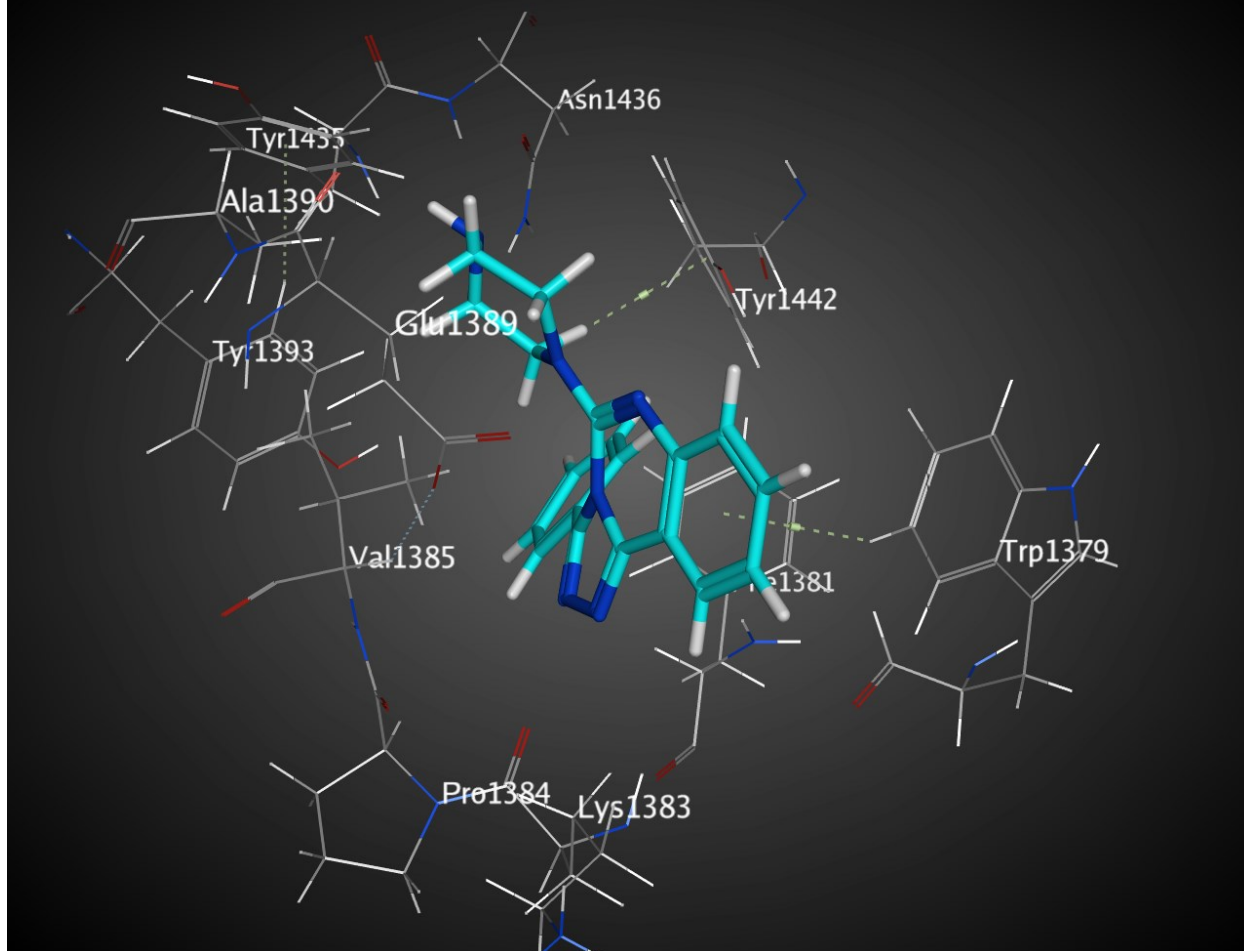

## Predicted binding mode of 31

Score -9.5325899

RMSD 1.0643

### Ligand Interactions Report

Ligand Receptor Interaction Distance E (kcal/mol)

N 12 ND2 ASN 1436 (A) H-acceptor 2.93 -3.3

5-ring 6-ring TYR 1442 (A) pi-pi 3.76 -0.0

6-ring 6-ring TYR 1442 (A) pi-pi 3.75 -0.0

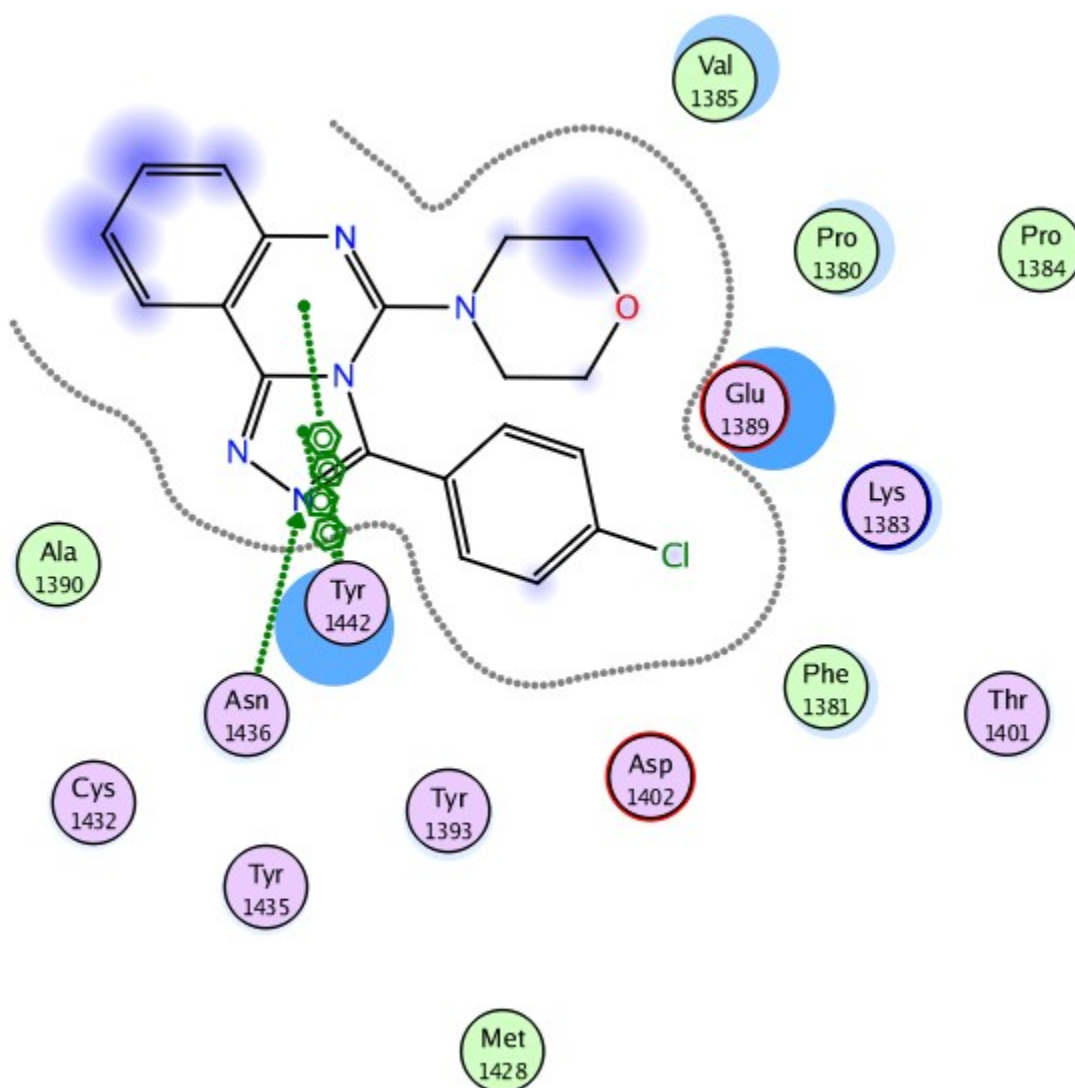

Entry: 1/8  
mol:

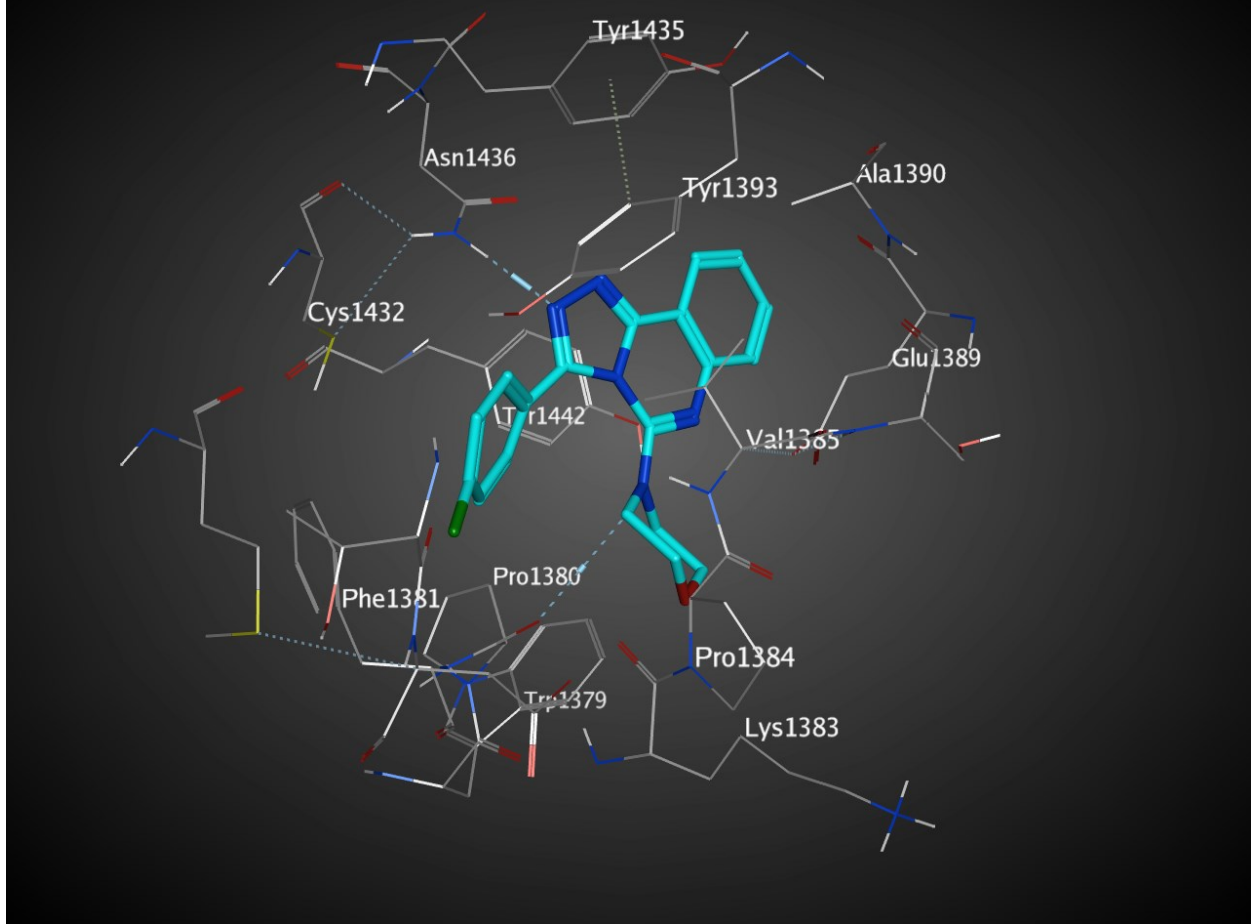

## Predicted binding mode of 32

Score -9.55867863      RMSD      0.8899

### Ligand Interactions Report

Ligand Receptor Interaction Distance E (kcal/mol)

CL 23 O THR 1401 (A) H-donor 3.44 -0.5

N 12 ND2 ASN 1436 (A) H-acceptor 2.85 -1.7

5-ring 6-ring TYR 1442 (A) pi-pi 3.91 -0.0

6-ring 6-ring TYR 1442 (A) pi-pi 3.79 -0.0

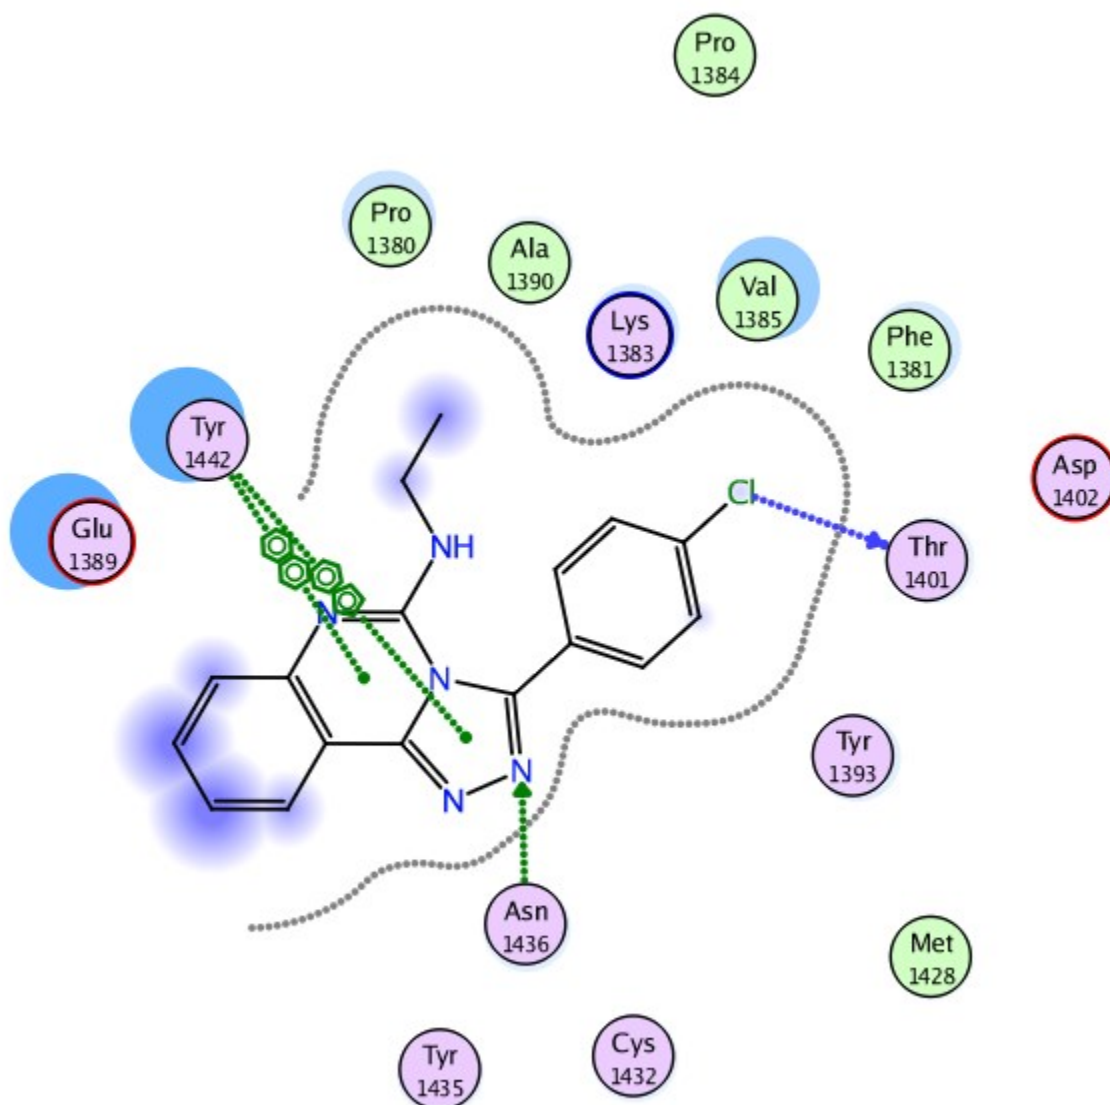

Entry: 1/15  
mol:

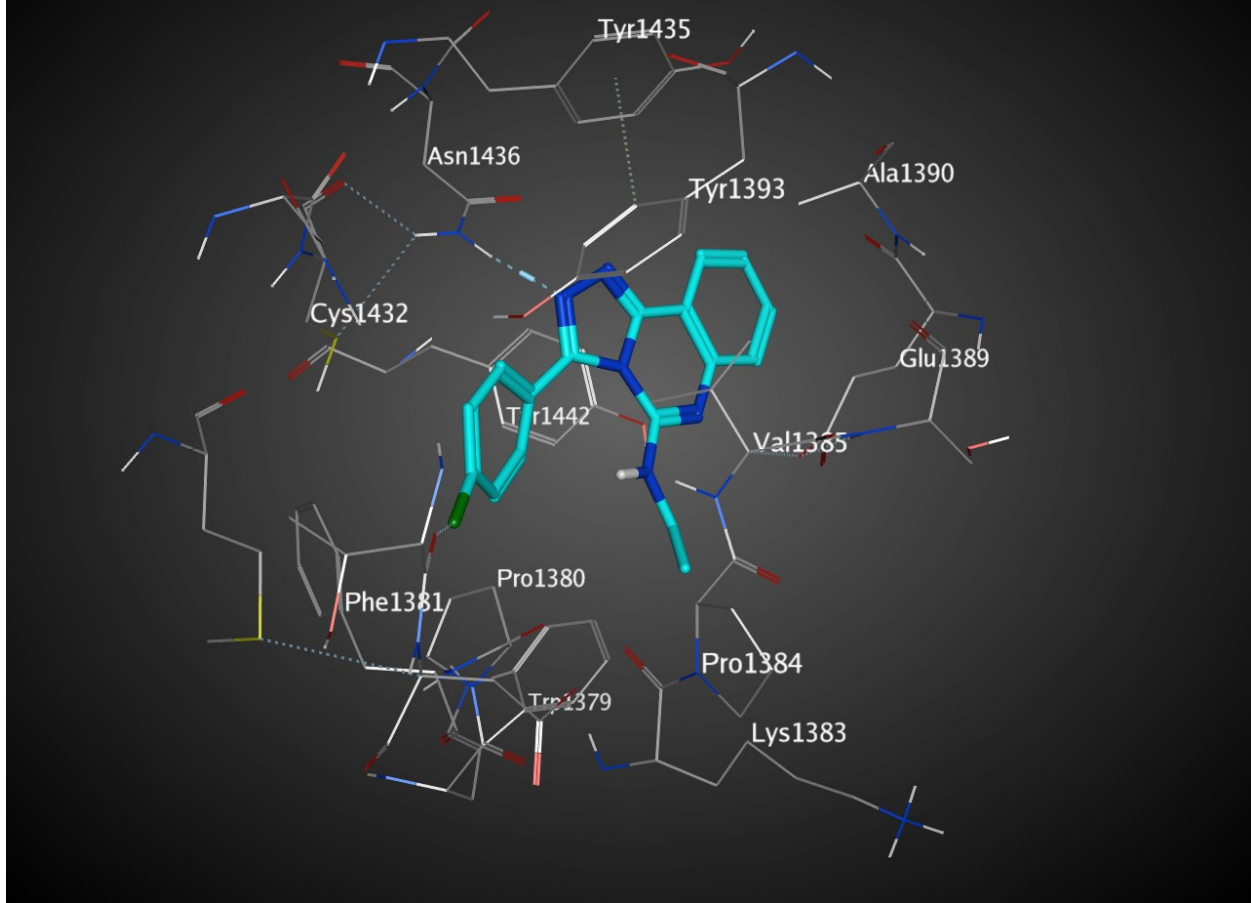

### Predicted binding mode of 33

Score -10.8010445      RMSD 0.9960

Ligand Interactions Report

Ligand Receptor Interaction Distance E (kcal/mol)

N 12 ND2 ASN 1436 (A) H-acceptor 2.85 -1.2

5-ring 6-ring TYR 1442 (A) pi-pi 3.96 -0.0

6-ring 6-ring TYR 1442 (A) pi-pi 3.75 -0.0

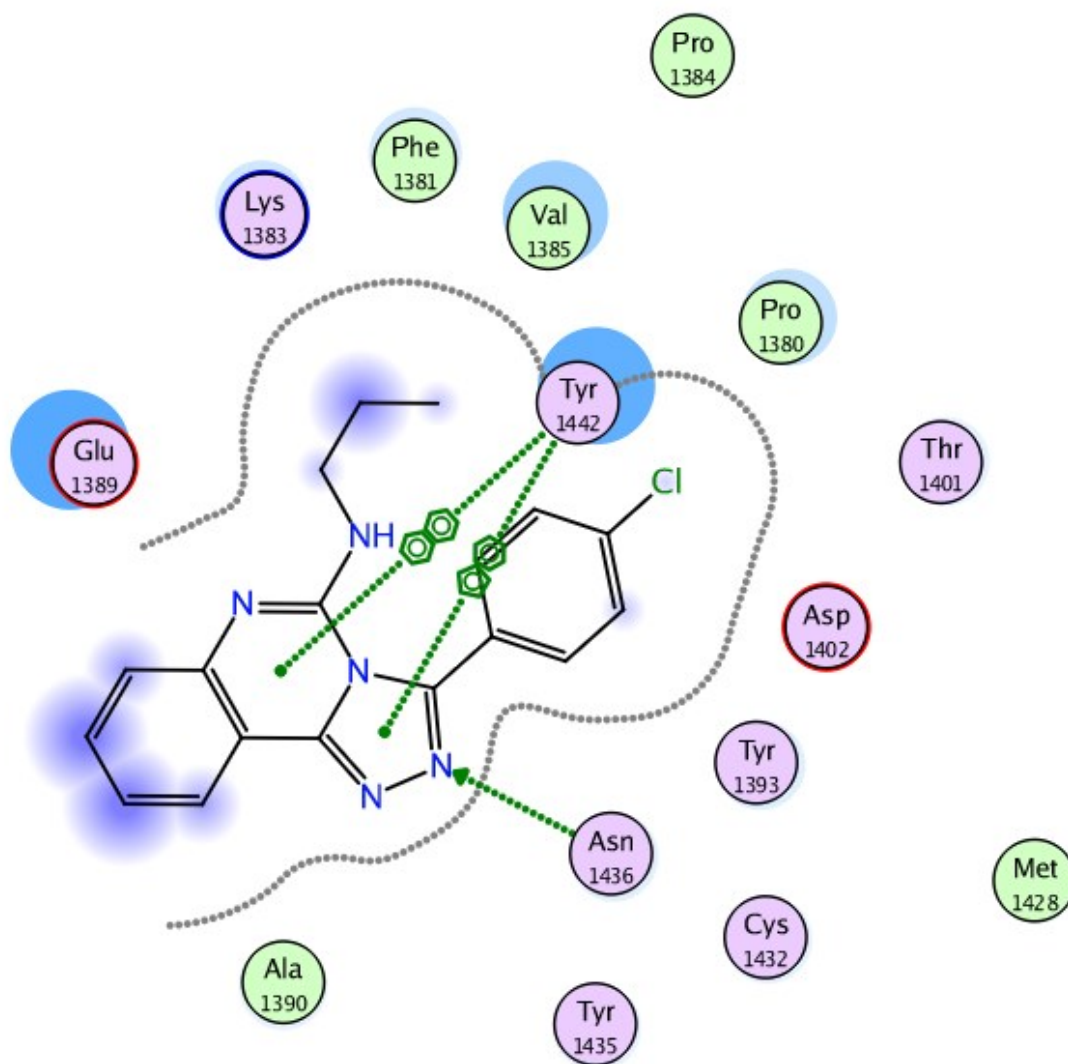

Entry: 1/16  
mol:

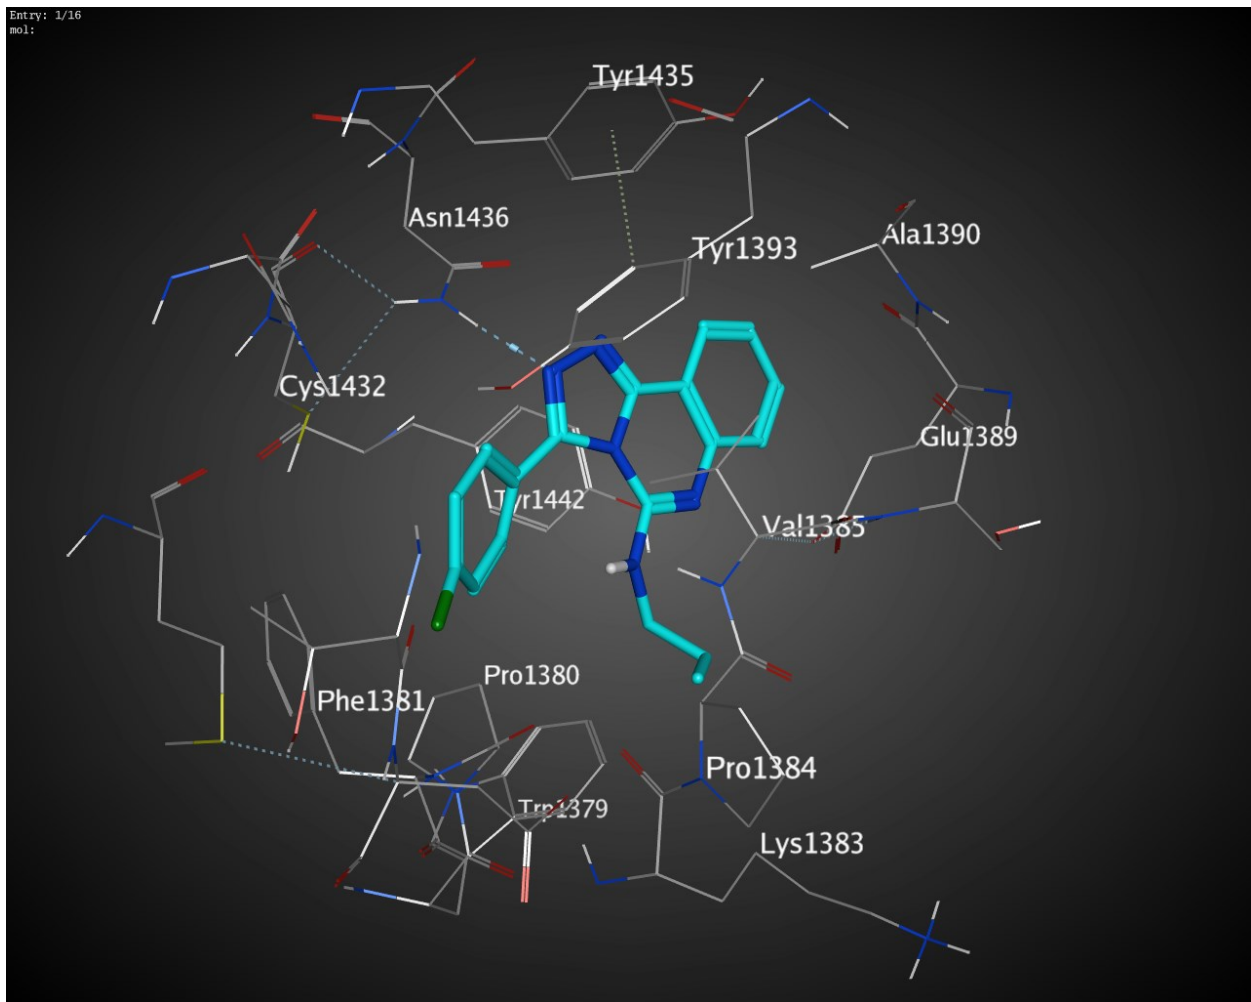

## Predicted binding mode of 34

Score -9.7841425                      RMSD 1.1640

Ligand Interactions Report

Ligand Receptor Interaction Distance E (kcal/mol)

CL 23 O THR 1401 (A) H-donor 3.42 -0.3

N 12 ND2 ASN 1436 (A) H-acceptor 2.87 -1.4

5-ring 6-ring TYR 1442 (A) pi-pi 3.95 -0.0

6-ring 6-ring TYR 1442 (A) pi-pi 3.75 -0.0

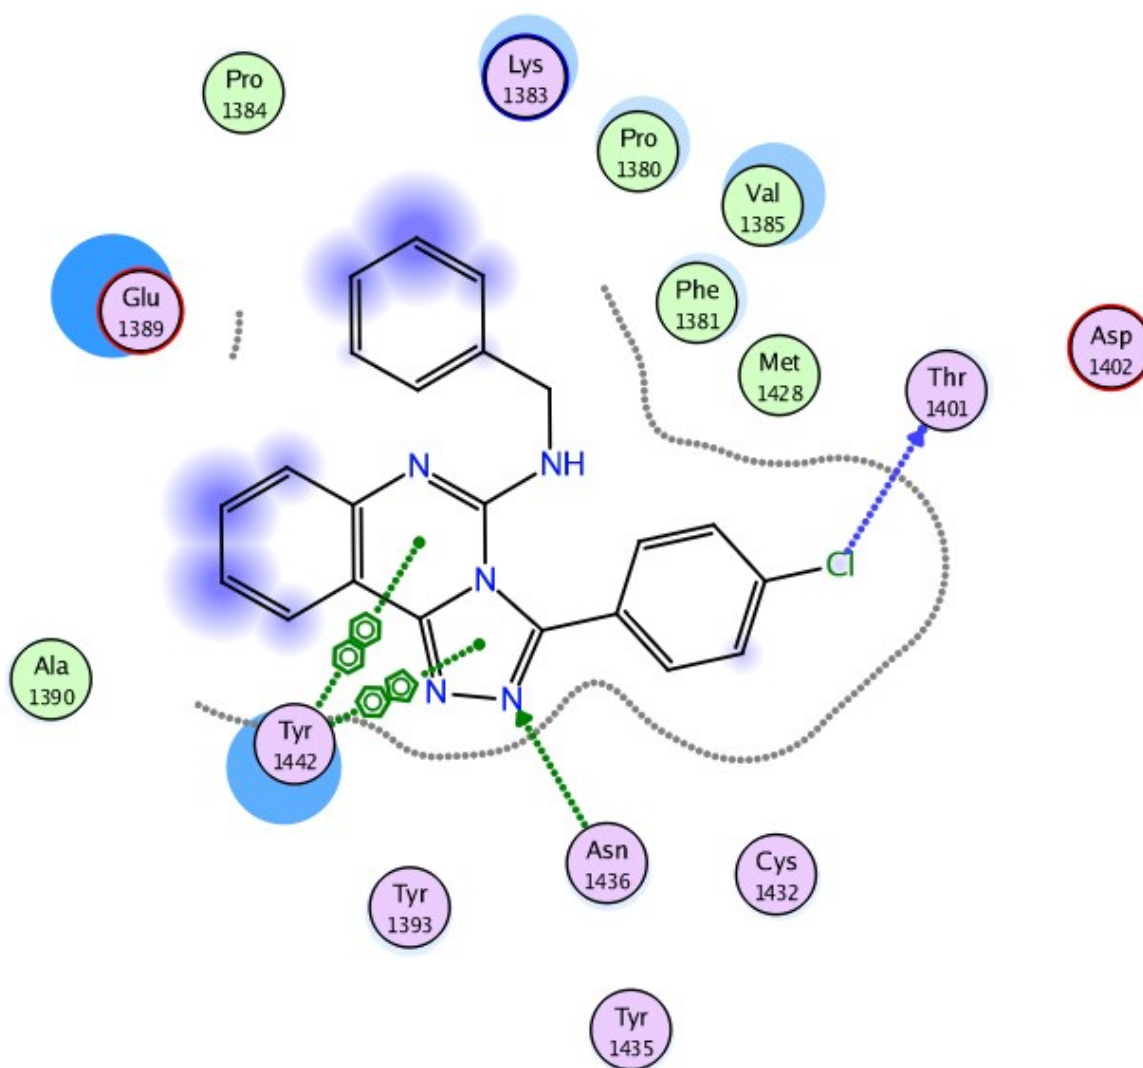



Entry: 2/10  
mol:

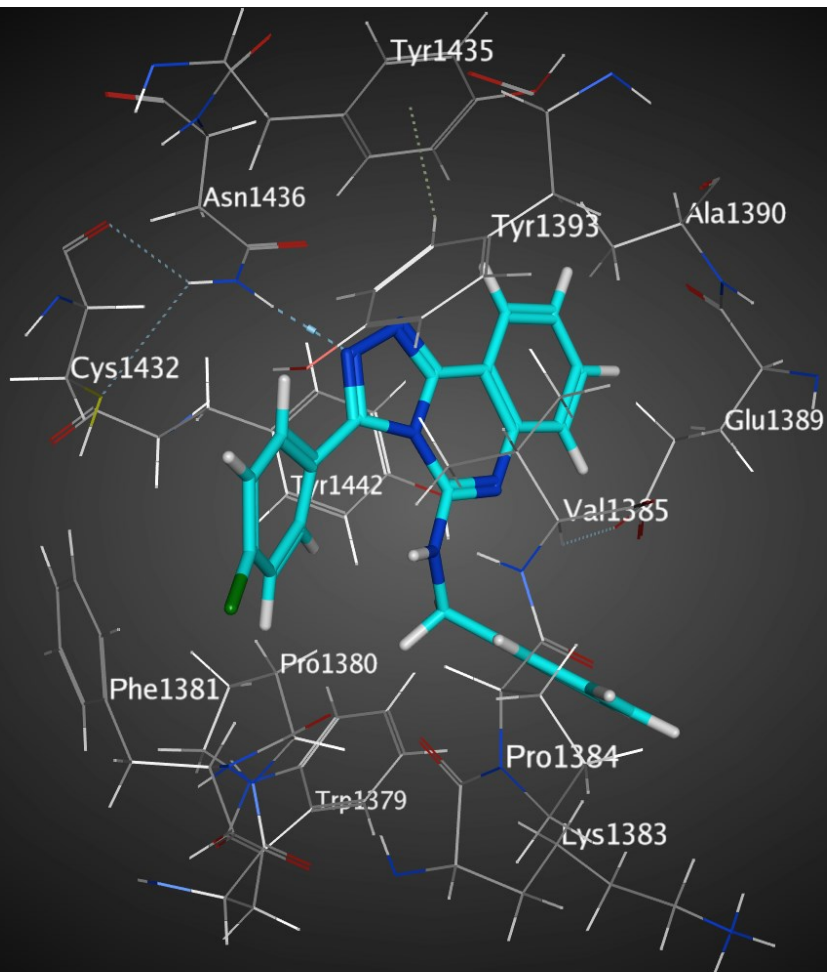

## Predicted binding mode of 35

Score -9.899581

RMSD 1.1064

Ligand Interactions Report

Ligand Receptor Interaction Distance E (kcal/mol)

N 14 OE1 GLU 1389 (A) H-donor 2.97 -1.2

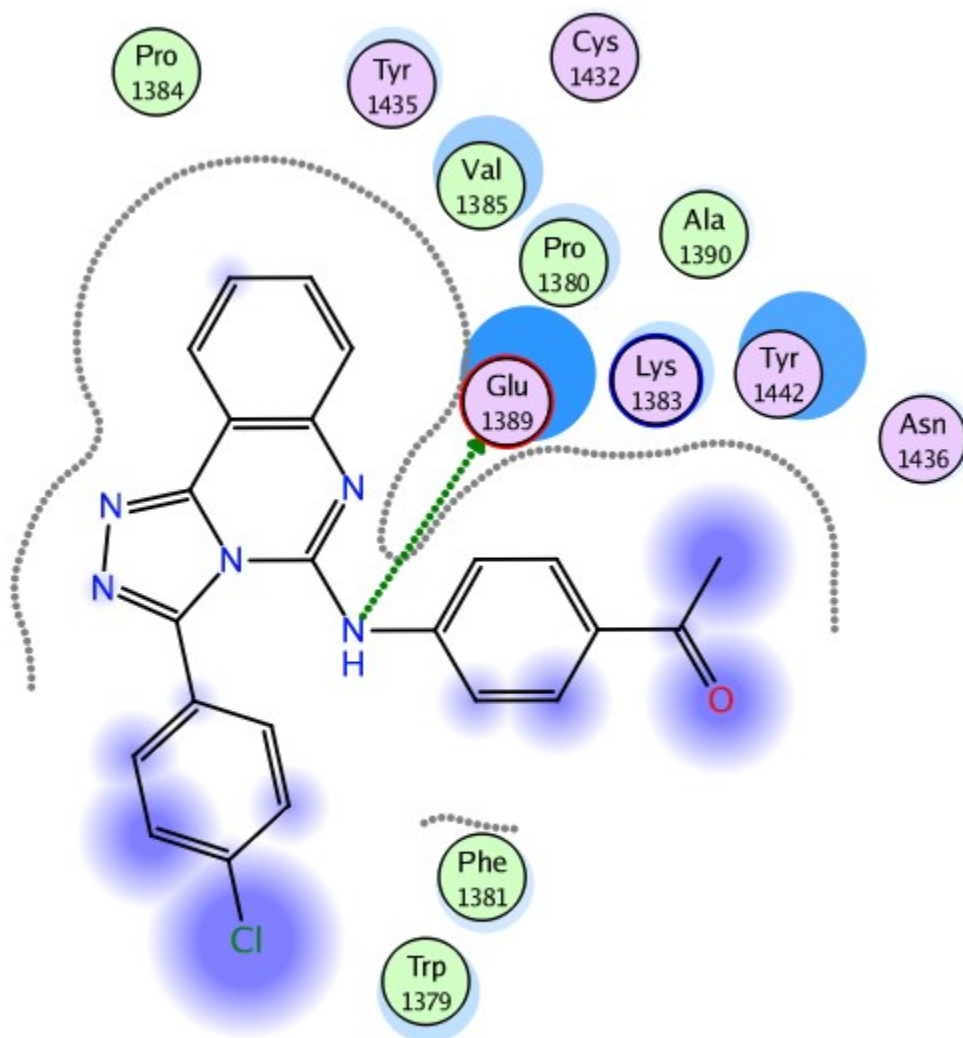

Entry: 3/9  
mol:

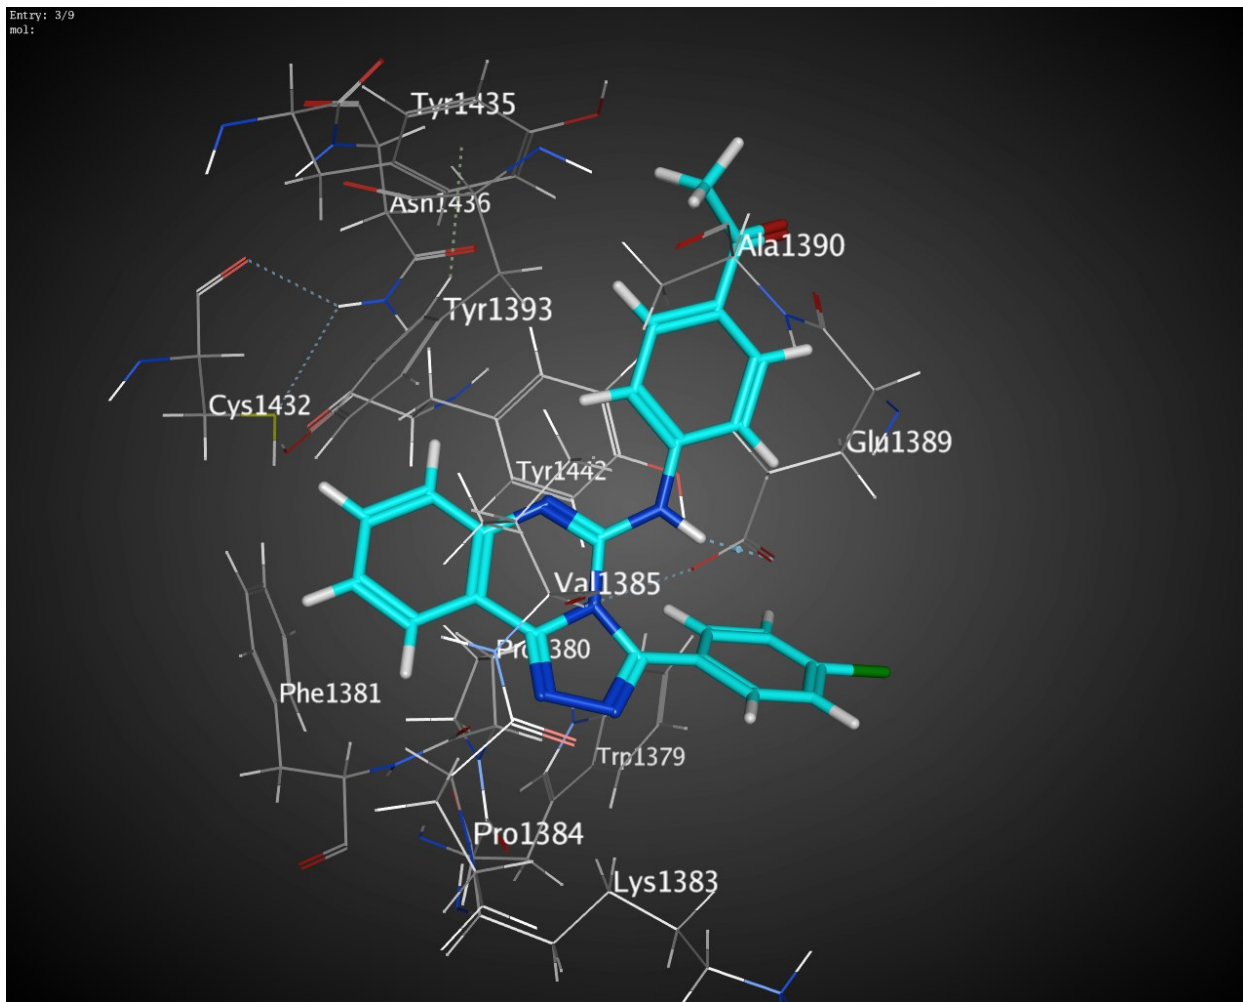

## Predicted binding mode of 36

Score -9.9297094

RMSD 1.1946

Ligand Interactions Report

Ligand Receptor Interaction Distance E (kcal/mol)

6-ring 6-ring TYR 1442 (A) pi-pi 3.93 -0.0

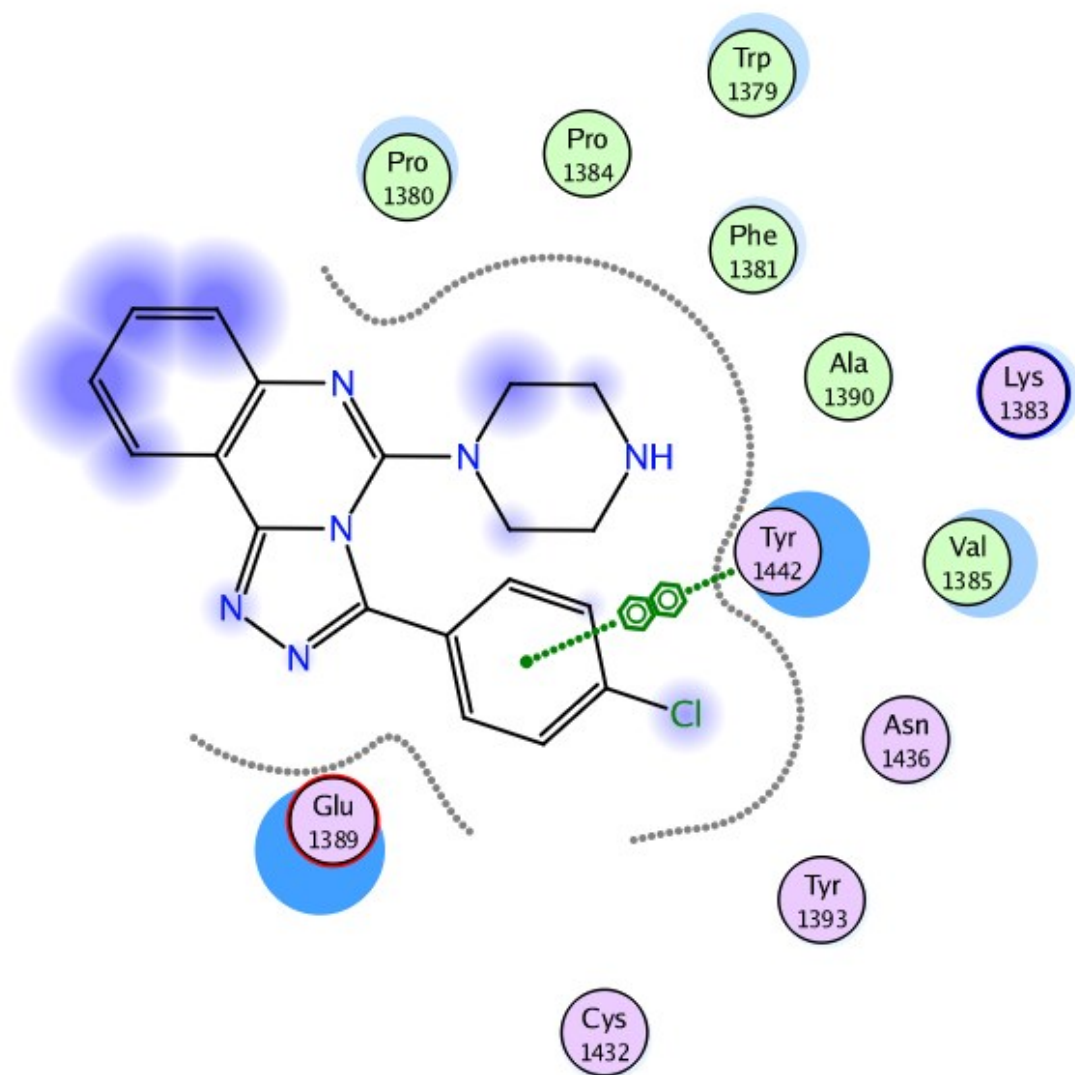

Entry: 2/8  
mol:

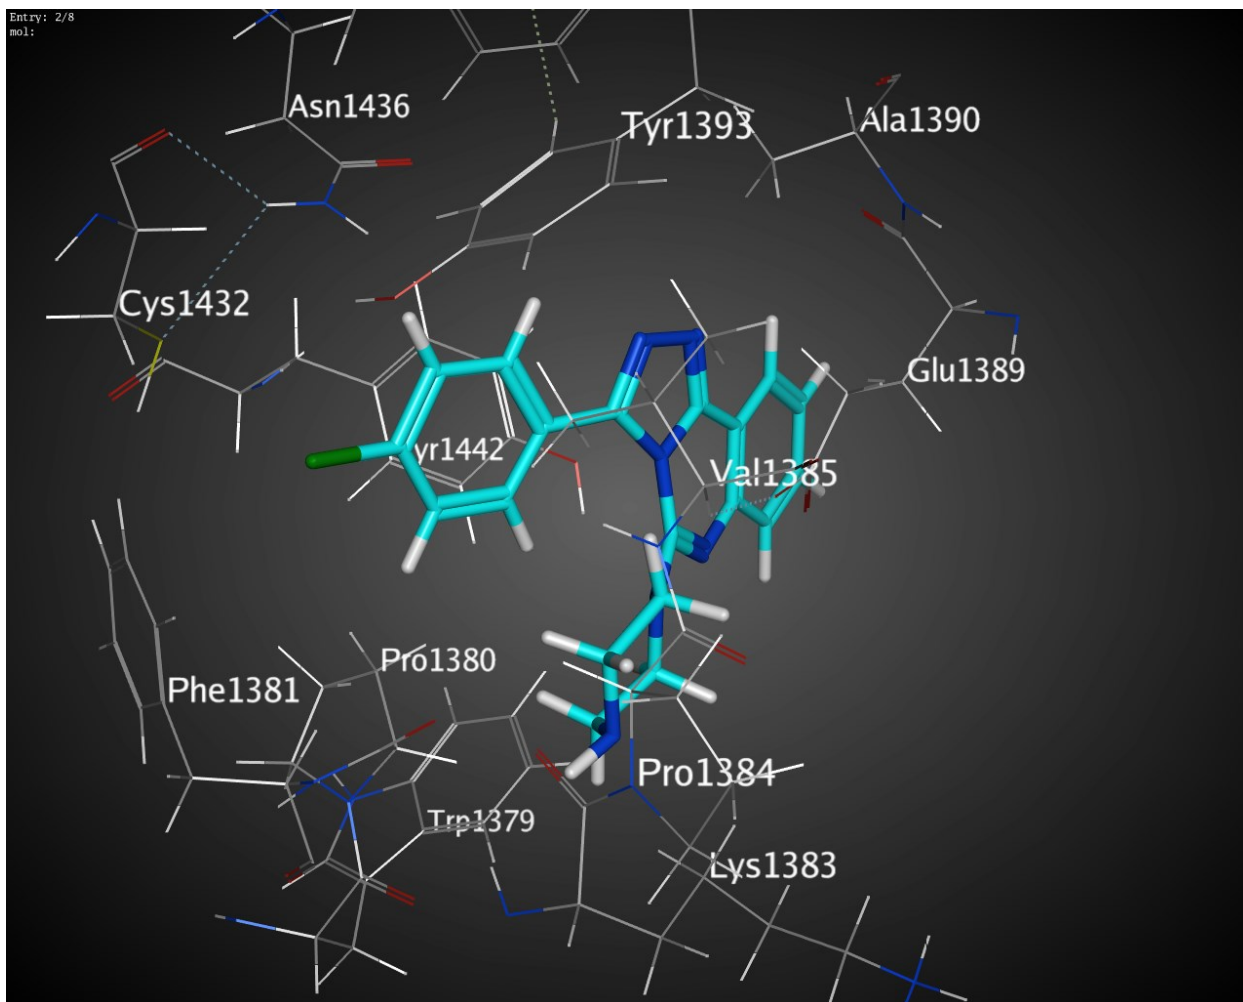

## In silico Pharmacokinetic Studies

### Pharmacokinetic Properties of 21

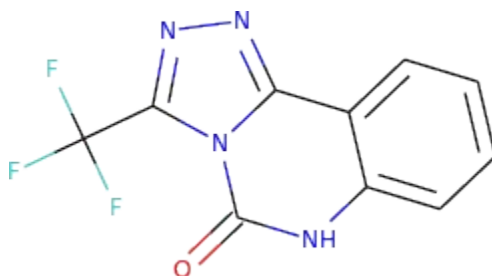

#### Molecule properties:

| Descriptor       | Value   |
|------------------|---------|
| Molecular Weight | 254.171 |
| LogP             | 1.5896  |
| #Rotatable Bonds | 0       |
| #Acceptors       | 4       |
| #Donors          | 1       |
| Surface Area     | 96.882  |

| Property   | Model Name            | Predicted Value | Unit                                        |
|------------|-----------------------|-----------------|---------------------------------------------|
| Absorption | Water solubility      | <b>-4.042</b>   | Numeric (log mol/L)                         |
| Absorption | Caco2 permeability    | <b>0.523</b>    | Numeric (log Papp in 10 <sup>-6</sup> cm/s) |
| Absorption | Intestinal absorption | 92.599          | Numeric (% Absorbed)                        |

| <b>Descriptor</b> | <b>Value</b>                |        |                      |
|-------------------|-----------------------------|--------|----------------------|
|                   | (human)                     |        |                      |
| Absorption        | Skin Permeability           | -3.032 | Numeric (log Kp)     |
| Absorption        | P-glycoprotein substrate    | No     | Categorical (Yes/No) |
| Absorption        | P-glycoprotein I inhibitor  | No     | Categorical (Yes/No) |
| Absorption        | P-glycoprotein II inhibitor | No     | Categorical (Yes/No) |
| Distribution      | VDss (human)                | -0.378 | Numeric (log L/kg)   |
| Distribution      | Fraction unbound (human)    | 0.321  | Numeric (Fu)         |
| Distribution      | BBB permeability            | 0.449  | Numeric (log BB)     |
| Distribution      | CNS permeability            | -2.28  | Numeric (log PS)     |
| Metabolism        | CYP2D6 substrate            | No     | Categorical (Yes/No) |
| Metabolism        | CYP3A4 substrate            | No     | Categorical (Yes/No) |
| Metabolism        | CYP1A2 inhibitor            | Yes    | Categorical (Yes/No) |

| <b>Descriptor</b> | <b>Value</b>                      |       |                            |
|-------------------|-----------------------------------|-------|----------------------------|
| Metabolism        | CYP2C19 inhibitor                 | No    | Categorical (Yes/No)       |
| Metabolism        | CYP2C9 inhibitor                  | No    | Categorical (Yes/No)       |
| Metabolism        | CYP2D6 inhibitor                  | No    | Categorical (Yes/No)       |
| Metabolism        | CYP3A4 inhibitor                  | No    | Categorical (Yes/No)       |
| Excretion         | Total Clearance                   | 0.27  | Numeric (log ml/min/kg)    |
| Excretion         | Renal OCT2 substrate              | No    | Categorical (Yes/No)       |
| Toxicity          | AMES toxicity                     | Yes   | Categorical (Yes/No)       |
| Toxicity          | Max. tolerated dose (human)       | -0.2  | Numeric (log mg/kg/day)    |
| Toxicity          | hERG I inhibitor                  | No    | Categorical (Yes/No)       |
| Toxicity          | hERG II inhibitor                 | No    | Categorical (Yes/No)       |
| Toxicity          | Oral Rat Acute Toxicity (LD50)    | 2.613 | Numeric (mol/kg)           |
| Toxicity          | Oral Rat Chronic Toxicity (LOAEL) | 1.367 | Numeric (log mg/kg_bw/day) |



**Descriptor Value**

|          |                       |       |                      |
|----------|-----------------------|-------|----------------------|
| Toxicity | Hepatotoxicity        | Yes   | Categorical (Yes/No) |
| Toxicity | Skin Sensitisation    | No    | Categorical (Yes/No) |
| Toxicity | T.Pyriformis toxicity | 0.606 | Numeric (log ug/L)   |
| Toxicity | Minnow toxicity       | 1.661 | Numeric (log mM)     |

Top of Form

Bottom of Form

Pharmacokinetic Properties of 22

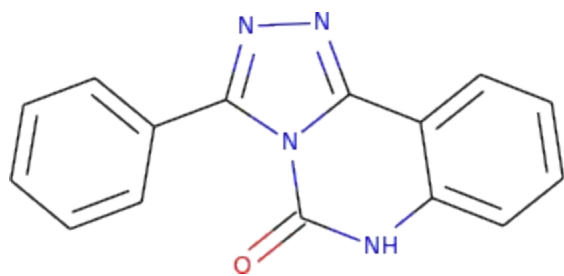

Molecule properties:

Descriptor Value

Molecular Weight 262.272

LogP 2.2378

#Rotatable Bonds 1

#Acceptors 4

| Descriptor   | Value                         |                 |                                             |
|--------------|-------------------------------|-----------------|---------------------------------------------|
| #Donors      | 1                             |                 |                                             |
| Surface Area | 113.077                       |                 |                                             |
| Property     | Model Name                    | Predicted Value | Unit                                        |
| Absorption   | Water solubility              | -3.398          | Numeric (log mol/L)                         |
| Absorption   | Caco2 permeability            | 0.734           | Numeric (log Papp in 10 <sup>-6</sup> cm/s) |
| Absorption   | Intestinal absorption (human) | 96.169          | Numeric (% Absorbed)                        |
| Absorption   | Skin Permeability             | -2.753          | Numeric (log Kp)                            |
| Absorption   | P-glycoprotein substrate      | Yes             | Categorical (Yes/No)                        |
| Absorption   | P-glycoprotein I inhibitor    | No              | Categorical (Yes/No)                        |
| Absorption   | P-glycoprotein II inhibitor   | No              | Categorical (Yes/No)                        |
| Distribution | VDss (human)                  | -0.2            | Numeric (log L/kg)                          |
| Distribution | Fraction unbound (human)      | 0.133           | Numeric (Fu)                                |

| Descriptor   | Value                |        |                         |
|--------------|----------------------|--------|-------------------------|
| Distribution | BBB permeability     | 0.58   | Numeric (log BB)        |
| Distribution | CNS permeability     | -2.097 | Numeric (log PS)        |
| Metabolism   | CYP2D6 substrate     | No     | Categorical (Yes/No)    |
| Metabolism   | CYP3A4 substrate     | Yes    | Categorical (Yes/No)    |
| Metabolism   | CYP1A2 inhibitor     | Yes    | Categorical (Yes/No)    |
| Metabolism   | CYP2C19 inhibitor    | No     | Categorical (Yes/No)    |
| Metabolism   | CYP2C9 inhibitor     | No     | Categorical (Yes/No)    |
| Metabolism   | CYP2D6 inhibitor     | No     | Categorical (Yes/No)    |
| Metabolism   | CYP3A4 inhibitor     | Yes    | Categorical (Yes/No)    |
| Excretion    | Total Clearance      | 0.784  | Numeric (log ml/min/kg) |
| Excretion    | Renal OCT2 substrate | No     | Categorical (Yes/No)    |
| Toxicity     | AMES toxicity        | Yes    | Categorical (Yes/No)    |

| Descriptor | Value                             |       |                            |
|------------|-----------------------------------|-------|----------------------------|
| Toxicity   | Max. tolerated dose (human)       | 0.407 | Numeric (log mg/kg/day)    |
| Toxicity   | hERG I inhibitor                  | No    | Categorical (Yes/No)       |
| Toxicity   | hERG II inhibitor                 | Yes   | Categorical (Yes/No)       |
| Toxicity   | Oral Rat Acute Toxicity (LD50)    | 2.749 | Numeric (mol/kg)           |
| Toxicity   | Oral Rat Chronic Toxicity (LOAEL) | 1.368 | Numeric (log mg/kg_bw/day) |
| Toxicity   | Hepatotoxicity                    | Yes   | Categorical (Yes/No)       |
| Toxicity   | Skin Sensitisation                | No    | Categorical (Yes/No)       |
| Toxicity   | T.Pyriformis toxicity             | 0.31  | Numeric (log ug/L)         |
| Toxicity   | Minnow toxicity                   | 0.618 | Numeric (log mM)           |

#### Pharmacokinetic Properties of 23

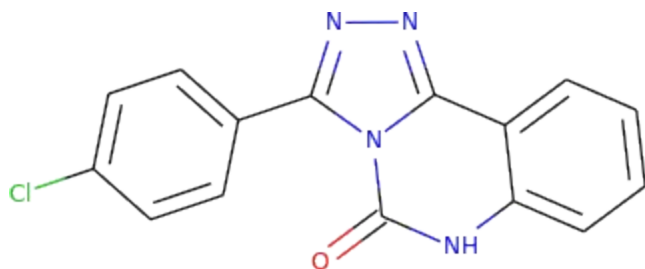

Molecule properties:

| Descriptor       | Value   |
|------------------|---------|
| Molecular Weight | 296.717 |
| LogP             | 2.8912  |
| #Rotatable Bonds | 1       |
| #Acceptors       | 4       |
| #Donors          | 1       |
| Surface Area     | 123.381 |

| Property   | Model Name                    | Predicted Value | Unit                                        |
|------------|-------------------------------|-----------------|---------------------------------------------|
| Absorption | Water solubility              | -3.509          | Numeric (log mol/L)                         |
| Absorption | Caco2 permeability            | 0.829           | Numeric (log Papp in 10 <sup>-6</sup> cm/s) |
| Absorption | Intestinal absorption (human) | 94.648          | Numeric (% Absorbed)                        |
| Absorption | Skin Permeability             | -2.757          | Numeric (log Kp)                            |
| Absorption | P-glycoprotein substrate      | Yes             | Categorical (Yes/No)                        |
| Absorption | P-glycoprotein I inhibitor    | No              | Categorical (Yes/No)                        |

| Descriptor   | Value                       |        |                      |
|--------------|-----------------------------|--------|----------------------|
| Absorption   | P-glycoprotein II inhibitor | No     | Categorical (Yes/No) |
| Distribution | VDss (human)                | -0.116 | Numeric (log L/kg)   |
| Distribution | Fraction unbound (human)    | 0.144  | Numeric (Fu)         |
| Distribution | BBB permeability            | 0.535  | Numeric (log BB)     |
| Distribution | CNS permeability            | -1.98  | Numeric (log PS)     |
| Metabolism   | CYP2D6 substrate            | No     | Categorical (Yes/No) |
| Metabolism   | CYP3A4 substrate            | Yes    | Categorical (Yes/No) |
| Metabolism   | CYP1A2 inhibitor            | Yes    | Categorical (Yes/No) |
| Metabolism   | CYP2C19 inhibitor           | Yes    | Categorical (Yes/No) |
| Metabolism   | CYP2C9 inhibitor            | Yes    | Categorical (Yes/No) |
| Metabolism   | CYP2D6 inhibitor            | No     | Categorical (Yes/No) |
| Metabolism   | CYP3A4 inhibitor            | Yes    | Categorical (Yes/No) |

| Descriptor | Value                             |        |                            |
|------------|-----------------------------------|--------|----------------------------|
| Excretion  | Total Clearance                   | -0.038 | Numeric (log ml/min/kg)    |
| Excretion  | Renal OCT2 substrate              | No     | Categorical (Yes/No)       |
| Toxicity   | AMES toxicity                     | Yes    | Categorical (Yes/No)       |
| Toxicity   | Max. tolerated dose (human)       | 0.389  | Numeric (log mg/kg/day)    |
| Toxicity   | hERG I inhibitor                  | No     | Categorical (Yes/No)       |
| Toxicity   | hERG II inhibitor                 | Yes    | Categorical (Yes/No)       |
| Toxicity   | Oral Rat Acute Toxicity (LD50)    | 2.753  | Numeric (mol/kg)           |
| Toxicity   | Oral Rat Chronic Toxicity (LOAEL) | 1.308  | Numeric (log mg/kg_bw/day) |
| Toxicity   | Hepatotoxicity                    | Yes    | Categorical (Yes/No)       |
| Toxicity   | Skin Sensitisation                | No     | Categorical (Yes/No)       |
| Toxicity   | T.Pyriformis toxicity             | 0.315  | Numeric (log ug/L)         |
| Toxicity   | Minnow toxicity                   | 0.143  | Numeric (log mM)           |

Pharmacokinetic Properties of 24

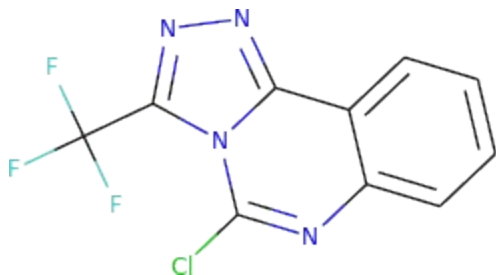

Molecule properties:

| Descriptor       | Value   |
|------------------|---------|
| Molecular Weight | 272.617 |
| LogP             | 2.9497  |
| #Rotatable Bonds | 0       |
| #Acceptors       | 4       |
| #Donors          | 0       |
| Surface Area     | 103.023 |

| Property   | Model Name            | Predicted Value | Unit                                        |
|------------|-----------------------|-----------------|---------------------------------------------|
| Absorption | Water solubility      | -3.711          | Numeric (log mol/L)                         |
| Absorption | Caco2 permeability    | 1.751           | Numeric (log Papp in 10 <sup>-6</sup> cm/s) |
| Absorption | Intestinal absorption | 93.989          | Numeric (%)                                 |



| Descriptor   | Value                       |        |                      |
|--------------|-----------------------------|--------|----------------------|
|              | (human)                     |        | Absorbed)            |
| Absorption   | Skin Permeability           | -2.582 | Numeric (log Kp)     |
| Absorption   | P-glycoprotein substrate    | No     | Categorical (Yes/No) |
| Absorption   | P-glycoprotein I inhibitor  | No     | Categorical (Yes/No) |
| Absorption   | P-glycoprotein II inhibitor | No     | Categorical (Yes/No) |
| Distribution | VDss (human)                | -0.304 | Numeric (log L/kg)   |
| Distribution | Fraction unbound (human)    | 0.223  | Numeric (Fu)         |
| Distribution | BBB permeability            | 0.918  | Numeric (log BB)     |
| Distribution | CNS permeability            | -1.664 | Numeric (log PS)     |
| Metabolism   | CYP2D6 substrate            | No     | Categorical (Yes/No) |
| Metabolism   | CYP3A4 substrate            | Yes    | Categorical (Yes/No) |
| Metabolism   | CYP1A2 inhibitor            | Yes    | Categorical (Yes/No) |

| Descriptor | Value                             |        |                            |
|------------|-----------------------------------|--------|----------------------------|
| Metabolism | CYP2C19 inhibitor                 | Yes    | Categorical (Yes/No)       |
| Metabolism | CYP2C9 inhibitor                  | No     | Categorical (Yes/No)       |
| Metabolism | CYP2D6 inhibitor                  | No     | Categorical (Yes/No)       |
| Metabolism | CYP3A4 inhibitor                  | No     | Categorical (Yes/No)       |
| Excretion  | Total Clearance                   | 0.133  | Numeric (log ml/min/kg)    |
| Excretion  | Renal OCT2 substrate              | No     | Categorical (Yes/No)       |
| Toxicity   | AMES toxicity                     | Yes    | Categorical (Yes/No)       |
| Toxicity   | Max. tolerated dose (human)       | -0.079 | Numeric (log mg/kg/day)    |
| Toxicity   | hERG I inhibitor                  | No     | Categorical (Yes/No)       |
| Toxicity   | hERG II inhibitor                 | No     | Categorical (Yes/No)       |
| Toxicity   | Oral Rat Acute Toxicity (LD50)    | 2.713  | Numeric (mol/kg)           |
| Toxicity   | Oral Rat Chronic Toxicity (LOAEL) | 1.642  | Numeric (log mg/kg_bw/day) |

| Descriptor | Value                 |       |                      |
|------------|-----------------------|-------|----------------------|
| Toxicity   | Hepatotoxicity        | Yes   | Categorical (Yes/No) |
| Toxicity   | Skin Sensitisation    | No    | Categorical (Yes/No) |
| Toxicity   | T.Pyriformis toxicity | 0.5   | Numeric (log ug/L)   |
| Toxicity   | Minnow toxicity       | 0.693 | Numeric (log mM)     |

#### Pharmacokinetic Properties

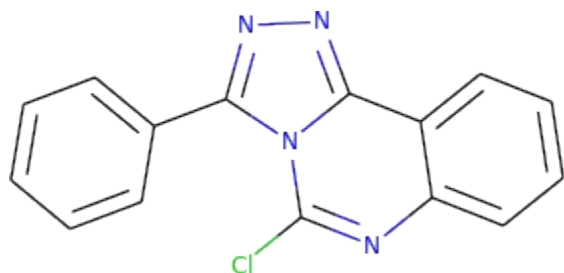

#### Molecule properties:

| Descriptor       | Value   |
|------------------|---------|
| Molecular Weight | 280.718 |
| LogP             | 3.5979  |
| #Rotatable Bonds | 1       |
| #Acceptors       | 4       |
| #Donors          | 0       |
| Surface Area     | 119.219 |

| Property     | Model Name                    | Predicted Value | Unit                                        |
|--------------|-------------------------------|-----------------|---------------------------------------------|
| Absorption   | Water solubility              | -3.458          | Numeric (log mol/L)                         |
| Absorption   | Caco2 permeability            | 1.607           | Numeric (log Papp in 10 <sup>-6</sup> cm/s) |
| Absorption   | Intestinal absorption (human) | 97.685          | Numeric (% Absorbed)                        |
| Absorption   | Skin Permeability             | -2.731          | Numeric (log Kp)                            |
| Absorption   | P-glycoprotein substrate      | No              | Categorical (Yes/No)                        |
| Absorption   | P-glycoprotein I inhibitor    | No              | Categorical (Yes/No)                        |
| Absorption   | P-glycoprotein II inhibitor   | Yes             | Categorical (Yes/No)                        |
| Distribution | VDss (human)                  | 0.095           | Numeric (log L/kg)                          |
| Distribution | Fraction unbound (human)      | 0.248           | Numeric (Fu)                                |
| Distribution | BBB permeability              | 1.011           | Numeric (log BB)                            |
| Distribution | CNS permeability              | -1.4            | Numeric (log PS)                            |

| Descriptor | Value                       |       |                         |
|------------|-----------------------------|-------|-------------------------|
| Metabolism | CYP2D6 substrate            | No    | Categorical (Yes/No)    |
| Metabolism | CYP3A4 substrate            | Yes   | Categorical (Yes/No)    |
| Metabolism | CYP1A2 inhibitor            | Yes   | Categorical (Yes/No)    |
| Metabolism | CYP2C19 inhibitor           | Yes   | Categorical (Yes/No)    |
| Metabolism | CYP2C9 inhibitor            | Yes   | Categorical (Yes/No)    |
| Metabolism | CYP2D6 inhibitor            | No    | Categorical (Yes/No)    |
| Metabolism | CYP3A4 inhibitor            | No    | Categorical (Yes/No)    |
| Excretion  | Total Clearance             | 0.215 | Numeric (log ml/min/kg) |
| Excretion  | Renal OCT2 substrate        | No    | Categorical (Yes/No)    |
| Toxicity   | AMES toxicity               | Yes   | Categorical (Yes/No)    |
| Toxicity   | Max. tolerated dose (human) | 0.535 | Numeric (log mg/kg/day) |
| Toxicity   | hERG I inhibitor            | No    | Categorical (Yes/No)    |

| Descriptor | Value                             |        |                            |
|------------|-----------------------------------|--------|----------------------------|
| Toxicity   | hERG II inhibitor                 | No     | Categorical (Yes/No)       |
| Toxicity   | Oral Rat Acute Toxicity (LD50)    | 2.436  | Numeric (mol/kg)           |
| Toxicity   | Oral Rat Chronic Toxicity (LOAEL) | 0.853  | Numeric (log mg/kg_bw/day) |
| Toxicity   | Hepatotoxicity                    | Yes    | Categorical (Yes/No)       |
| Toxicity   | Skin Sensitisation                | No     | Categorical (Yes/No)       |
| Toxicity   | T.Pyriformis toxicity             | 0.293  | Numeric (log ug/L)         |
| Toxicity   | Minnow toxicity                   | -0.048 | Numeric (log mM)           |

#### Pharmacokinetic Properties of 26

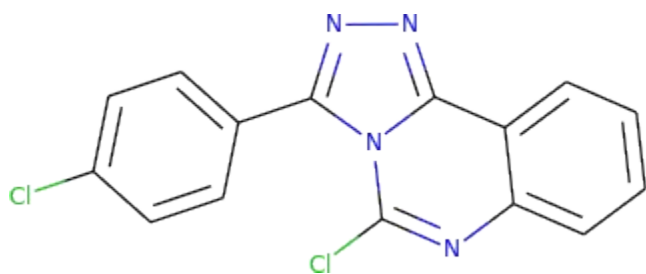

#### Molecule properties:

| Descriptor       | Value   |
|------------------|---------|
| Molecular Weight | 315.163 |

| Descriptor       | Value   |
|------------------|---------|
| LogP             | 4.2513  |
| #Rotatable Bonds | 1       |
| #Acceptors       | 4       |
| #Donors          | 0       |
| Surface Area     | 129.522 |

| Property   | Model Name                    | Predicted Value | Unit                                        |
|------------|-------------------------------|-----------------|---------------------------------------------|
| Absorption | Water solubility              | -3.611          | Numeric (log mol/L)                         |
| Absorption | Caco2 permeability            | 1.458           | Numeric (log Papp in 10 <sup>-6</sup> cm/s) |
| Absorption | Intestinal absorption (human) | 96.101          | Numeric (% Absorbed)                        |
| Absorption | Skin Permeability             | -2.729          | Numeric (log Kp)                            |
| Absorption | P-glycoprotein substrate      | No              | Categorical (Yes/No)                        |
| Absorption | P-glycoprotein I inhibitor    | No              | Categorical (Yes/No)                        |
| Absorption | P-glycoprotein II inhibitor   | Yes             | Categorical (Yes/No)                        |

| Descriptor   | Value                    |        |                         |
|--------------|--------------------------|--------|-------------------------|
| Distribution | VDss (human)             | 0.187  | Numeric (log L/kg)      |
| Distribution | Fraction unbound (human) | 0.26   | Numeric (Fu)            |
| Distribution | BBB permeability         | 0.965  | Numeric (log BB)        |
| Distribution | CNS permeability         | -1.396 | Numeric (log PS)        |
| Metabolism   | CYP2D6 substrate         | No     | Categorical (Yes/No)    |
| Metabolism   | CYP3A4 substrate         | Yes    | Categorical (Yes/No)    |
| Metabolism   | CYP1A2 inhibitor         | Yes    | Categorical (Yes/No)    |
| Metabolism   | CYP2C19 inhibitor        | Yes    | Categorical (Yes/No)    |
| Metabolism   | CYP2C9 inhibitor         | Yes    | Categorical (Yes/No)    |
| Metabolism   | CYP2D6 inhibitor         | No     | Categorical (Yes/No)    |
| Metabolism   | CYP3A4 inhibitor         | No     | Categorical (Yes/No)    |
| Excretion    | Total Clearance          | -0.035 | Numeric (log ml/min/kg) |



| Descriptor | Value                             |        |                            |
|------------|-----------------------------------|--------|----------------------------|
| Excretion  | Renal OCT2 substrate              | No     | Categorical (Yes/No)       |
| Toxicity   | AMES toxicity                     | No     | Categorical (Yes/No)       |
| Toxicity   | Max. tolerated dose (human)       | 0.442  | Numeric (log mg/kg/day)    |
| Toxicity   | hERG I inhibitor                  | No     | Categorical (Yes/No)       |
| Toxicity   | hERG II inhibitor                 | No     | Categorical (Yes/No)       |
| Toxicity   | Oral Rat Acute Toxicity (LD50)    | 2.458  | Numeric (mol/kg)           |
| Toxicity   | Oral Rat Chronic Toxicity (LOAEL) | 0.675  | Numeric (log mg/kg_bw/day) |
| Toxicity   | Hepatotoxicity                    | Yes    | Categorical (Yes/No)       |
| Toxicity   | Skin Sensitisation                | No     | Categorical (Yes/No)       |
| Toxicity   | T.Pyiformis toxicity              | 0.296  | Numeric (log ug/L)         |
| Toxicity   | Minnow toxicity                   | -0.914 | Numeric (log mM)           |

## Spectral Date of New Compounds

### IR spectrum of compound 21

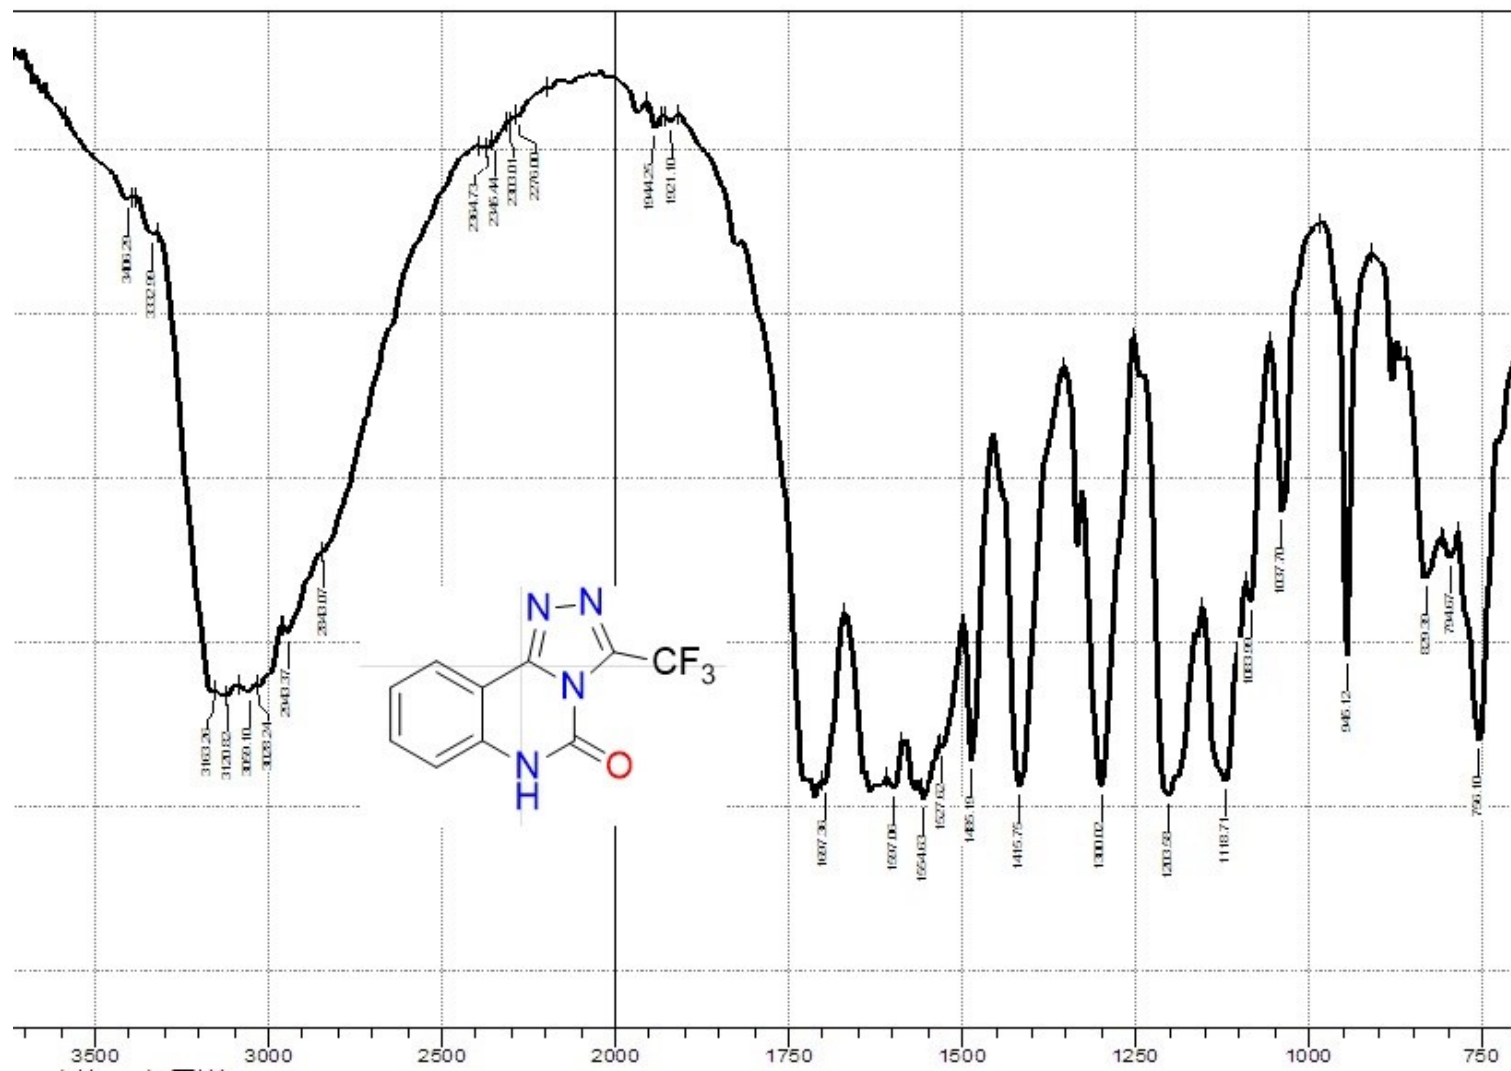

# <sup>1</sup>H NMR Spectrum of compound 21

Abd Allah turky-TH-M-proton

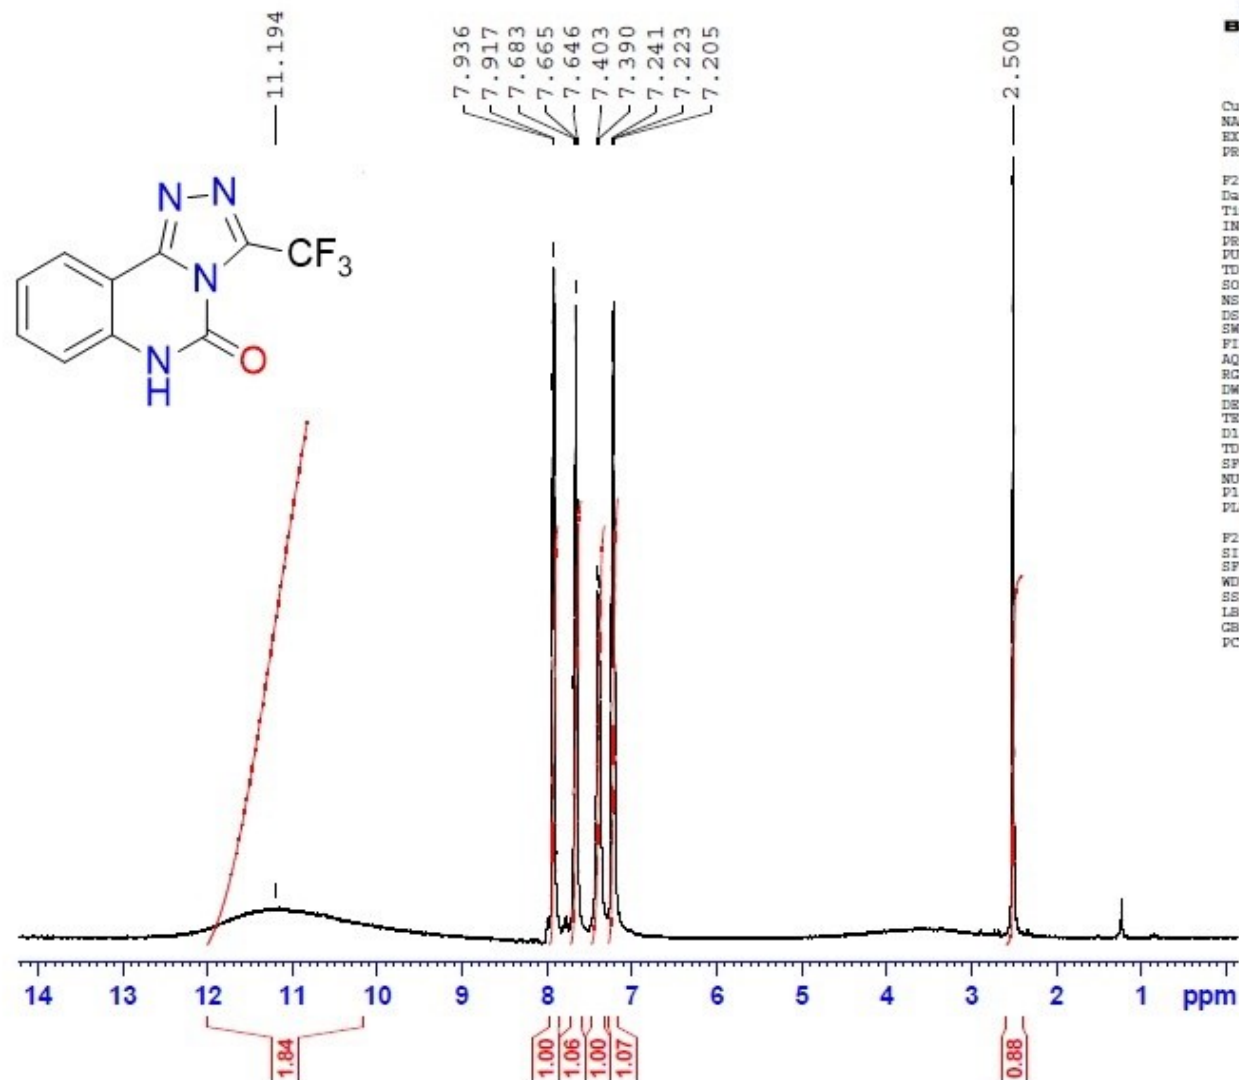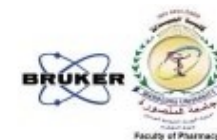

Current Data Parameters  
NAME Abd Allah turky-TH-M-proton  
EXPNO 10  
PROCNO 1

F2 - Acquisition Parameters  
Date\_ 20181113  
Time 10.44 h  
INSTRUM spect  
PROBHD Z108618\_0945 (   
PULPROG zg30  
TD 65536  
SOLVENT DMSO  
NS 16  
DS 2  
SWH 8012.820 Hz  
FIDRES 0.244532 Hz  
AQ 4.0894665 sec  
RG 158.72  
DM 62.400 usec  
DE 6.50 usec  
TE 292.4 K  
D1 1.00000000 sec  
TD0 1  
SFO1 400.2024712 MHz  
NUC1 1H  
P1 13.50 usec  
PLW1 13.00000000 W

F2 - Processing parameters  
SI 65536  
SF 400.2000000 MHz  
WDW EM  
SSB 0  
LB 0.30 Hz  
GB 0  
PC 1.00

## Mass spectrum of compound 21

C:\Khalid\data1\Simohamed-hamed-TFH2-cl

THE REGIONAL CENTER FOR MYCOLOGY AND BIOTECHNOLOGY  
AZHAR UNIVERSITY

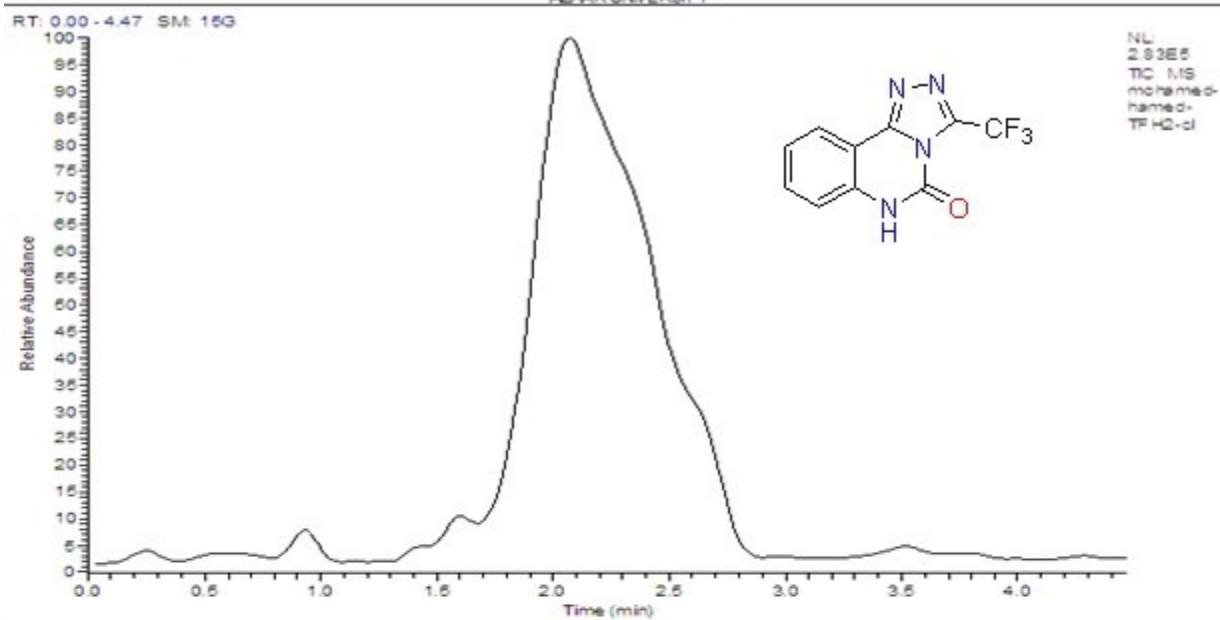

mohamed-hamed-TFH2-cl #160 RT: 2.09 AV: 1 SB: 2.445, 4.45 NL: 3.80E3  
T: (0.0) + e EI Full ms [40.00-1000.00]

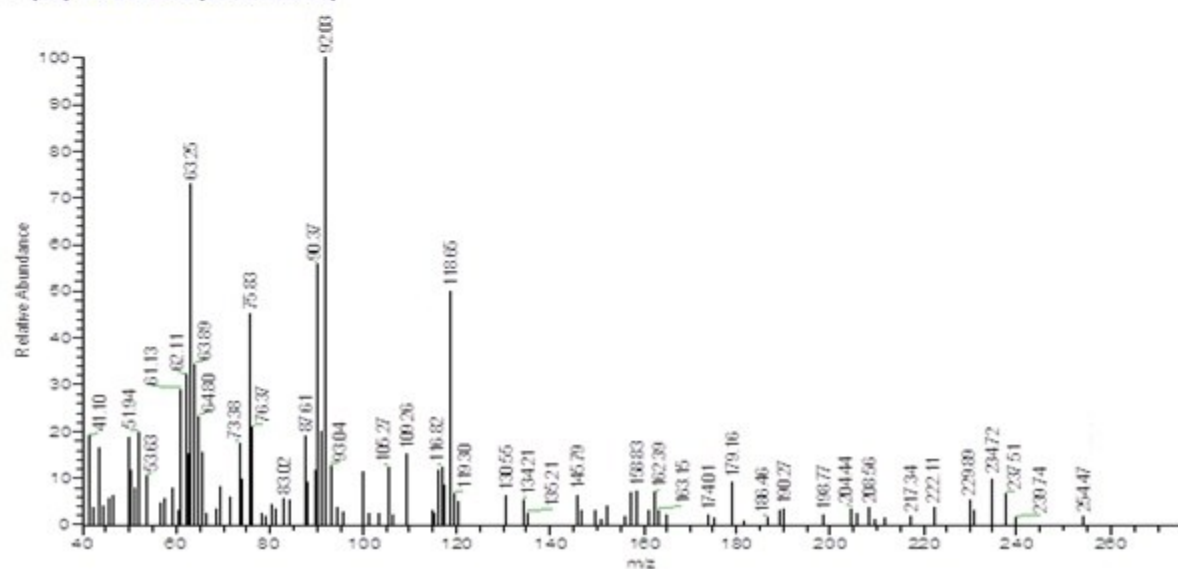

# IR spectrum of compound 22

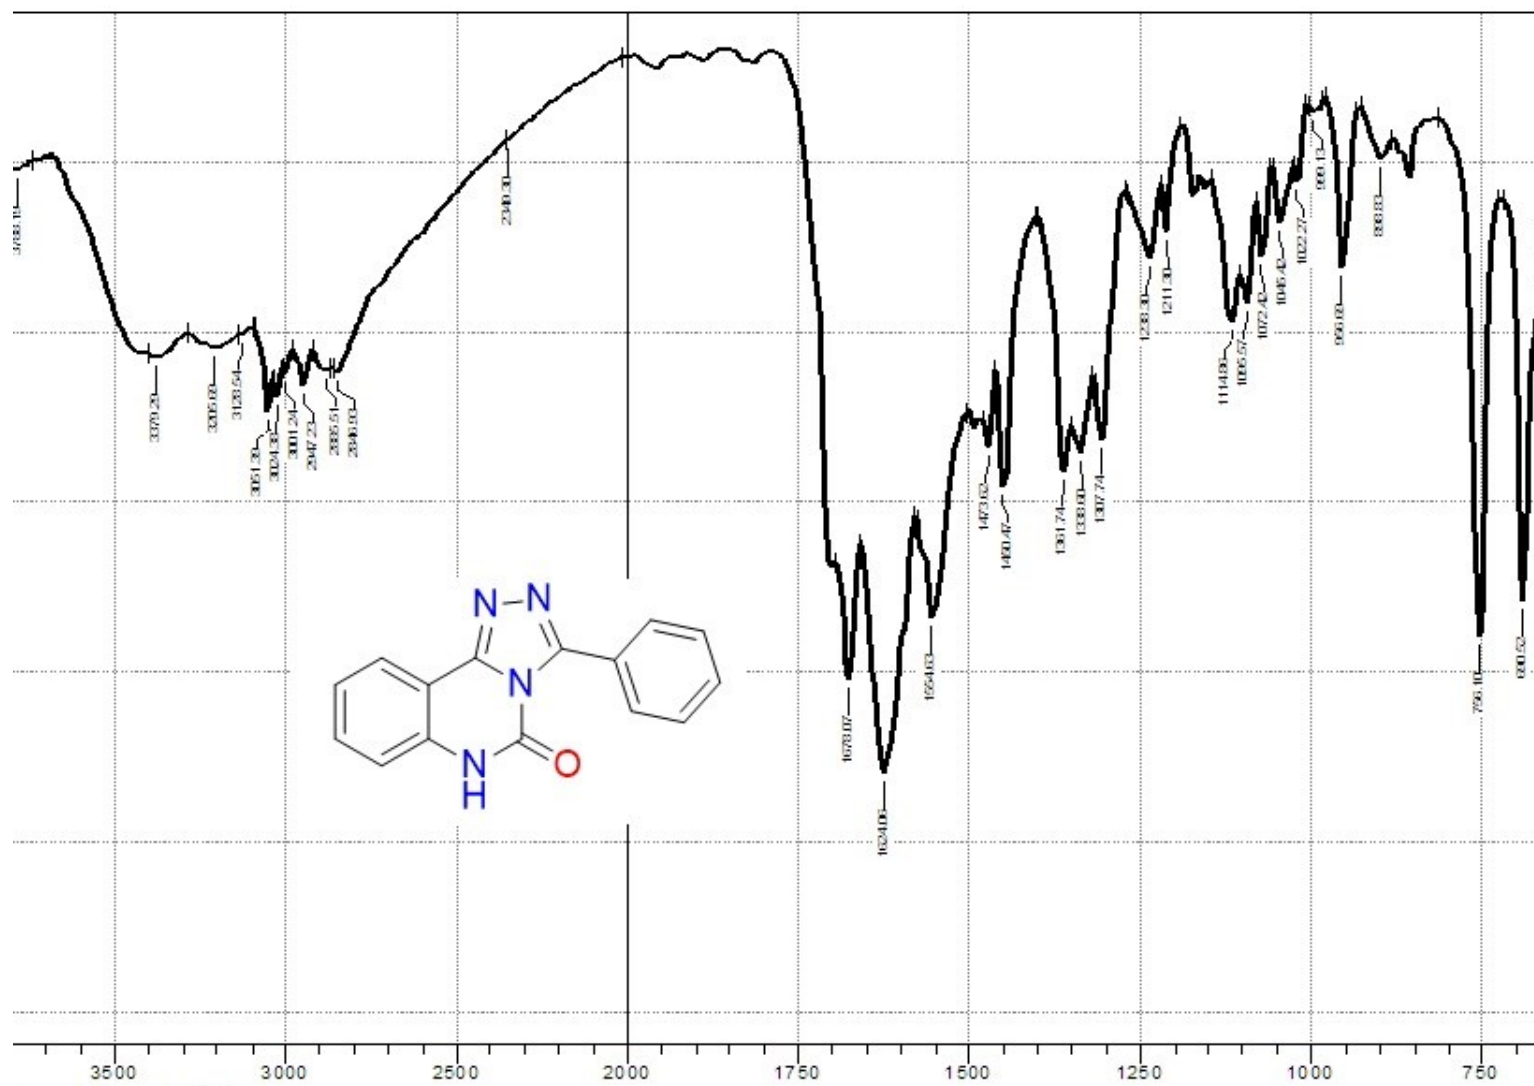

# <sup>1</sup>H NMR Spectrum of compound 22

Mohamed ElShershaby\_H\_MA1-one

Microanalytical Unit - FOPCU - NMR laboratory  
www.pharma.cu.edu.eg dir-mau.fopcu@pharma.cu.edu.eg

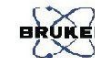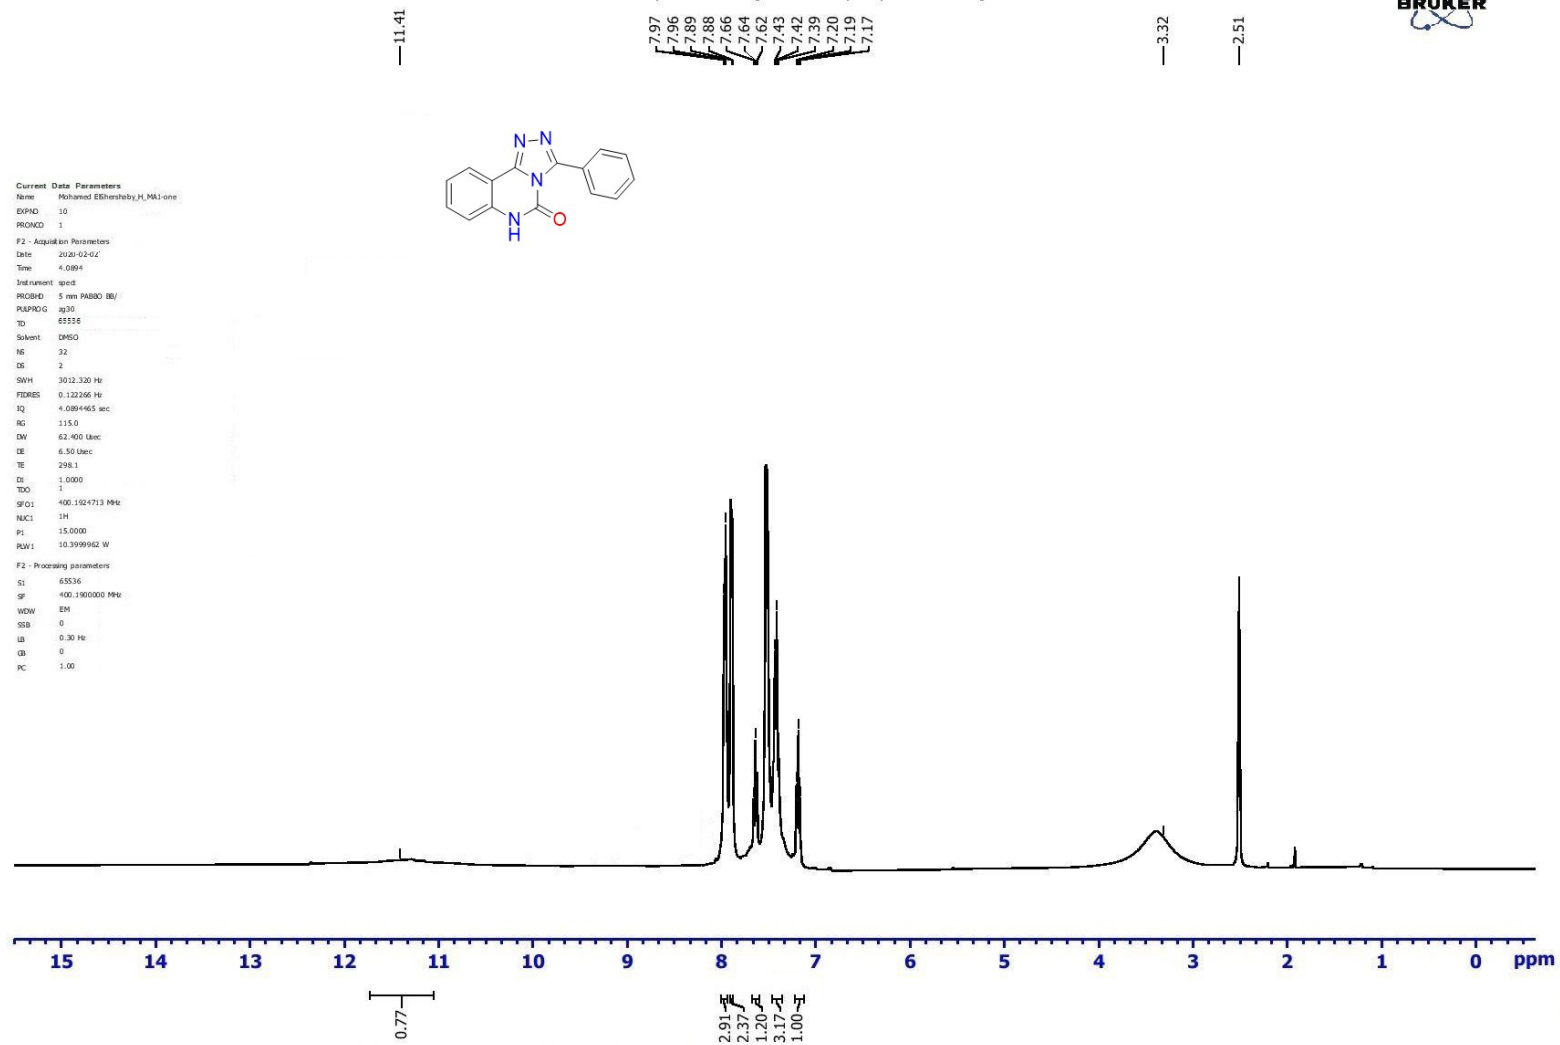

# Mass spectrum of compound 22

C:\xcalibur\...mohamed-hamed-ms1-one\_2

THE REGIONAL CENTER FOR MYCOLOGY AND BIOTECHNOLOGY  
AZHAR UNIVERSITY

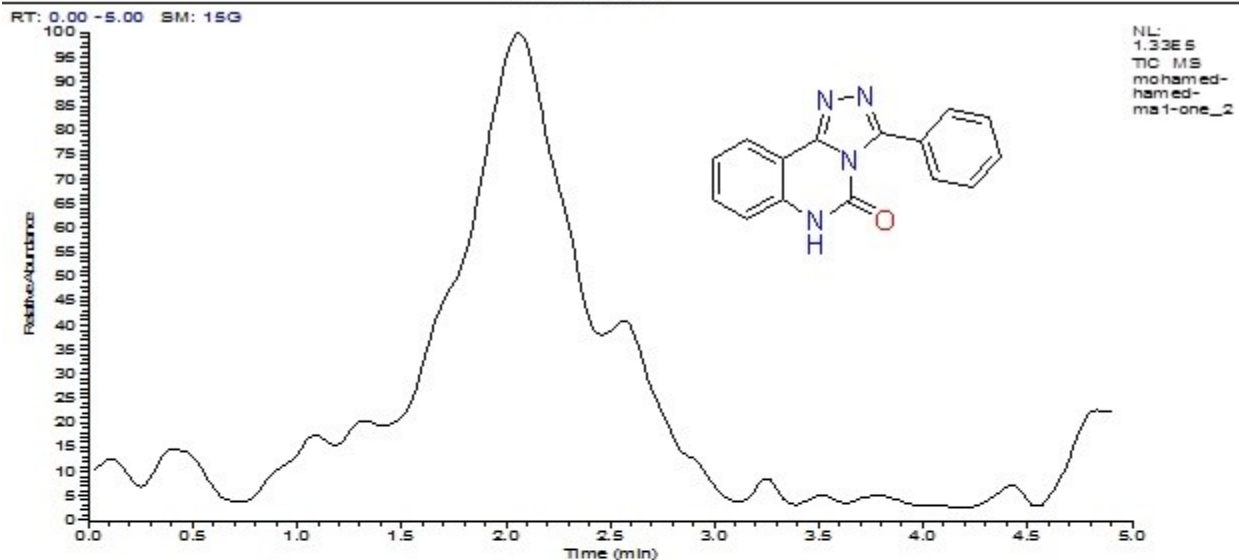

mohamed-hamed-ms1-one\_2 #63-183 RT: 1.07-3.08 AV: 121 SB: 2 4.46 , 4.46 NL: 3.95E3  
T: (0,0) + c EI Full ms (40.00-1000.00)

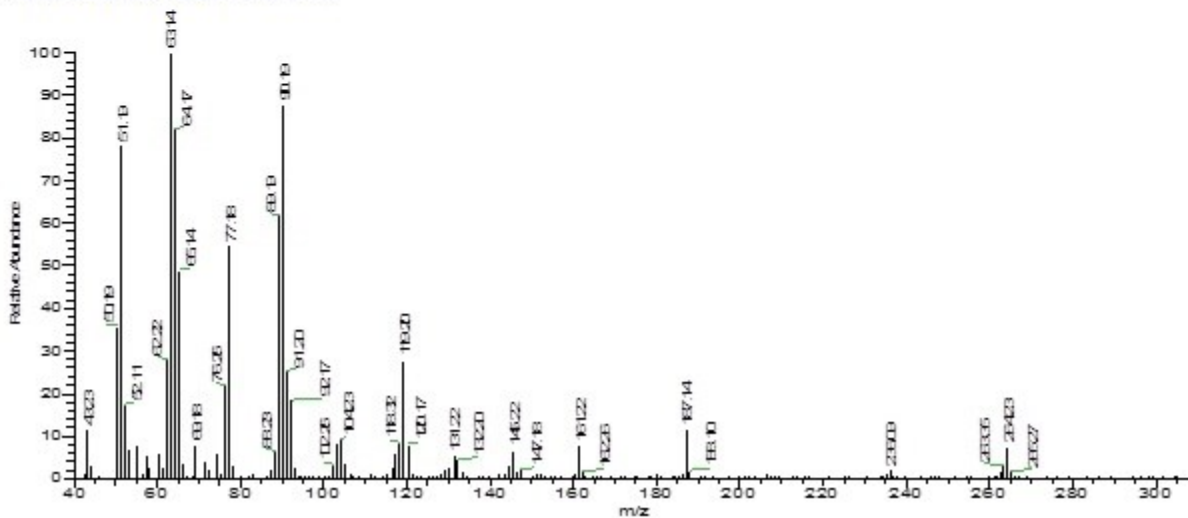

# IR spectrum of compound 24

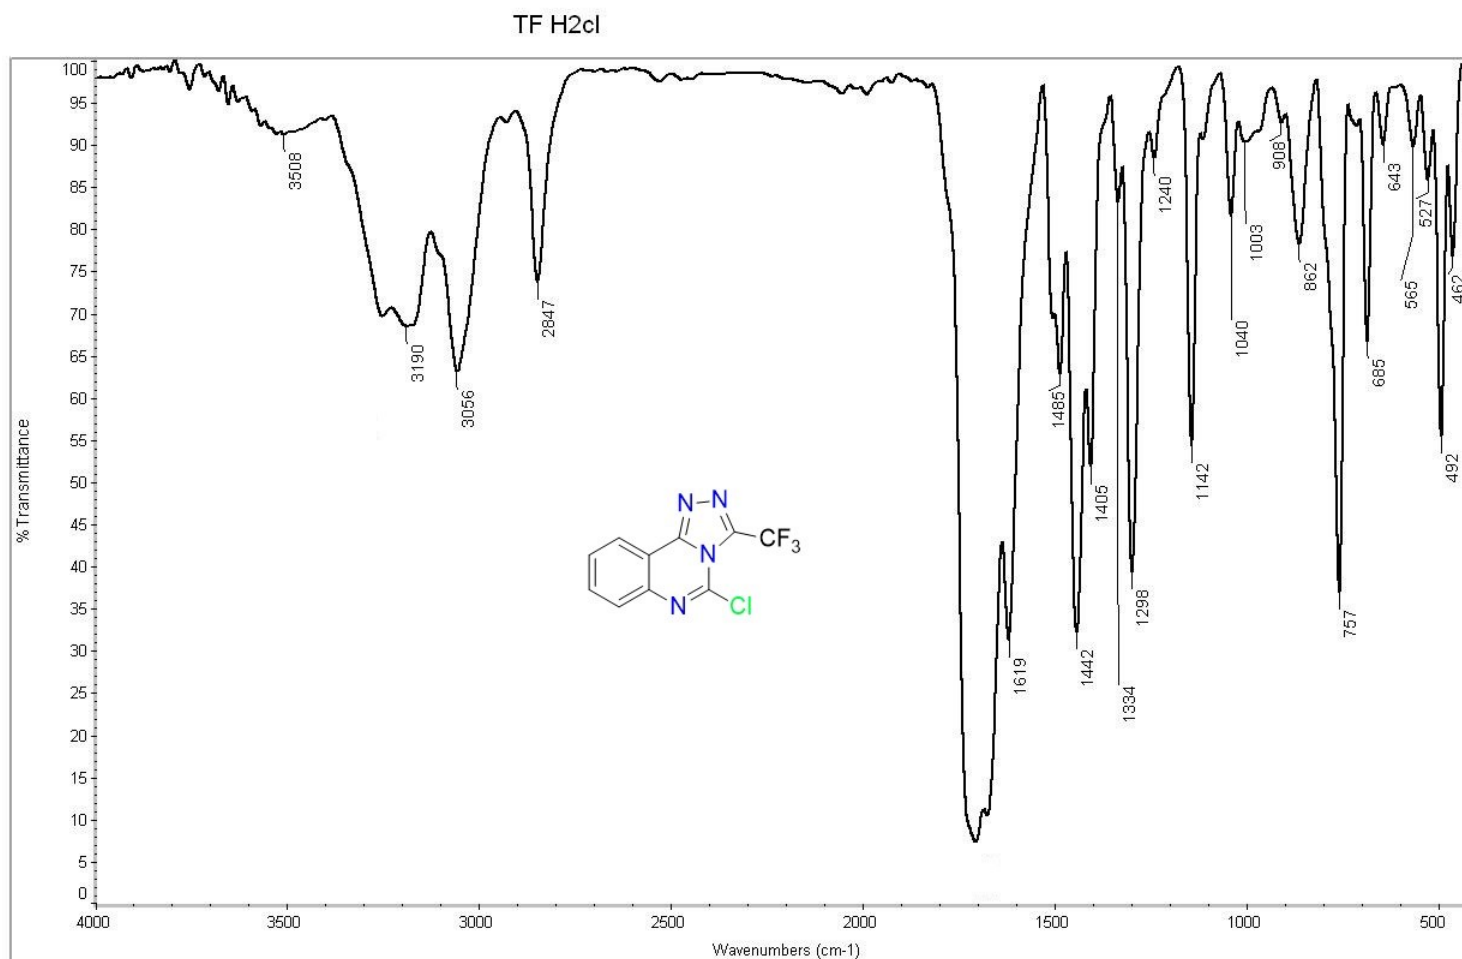



# <sup>1</sup>H NMR Spectrum of compound 24

Mohamed Hamed-PrH1-DMSO-Hnmr-A

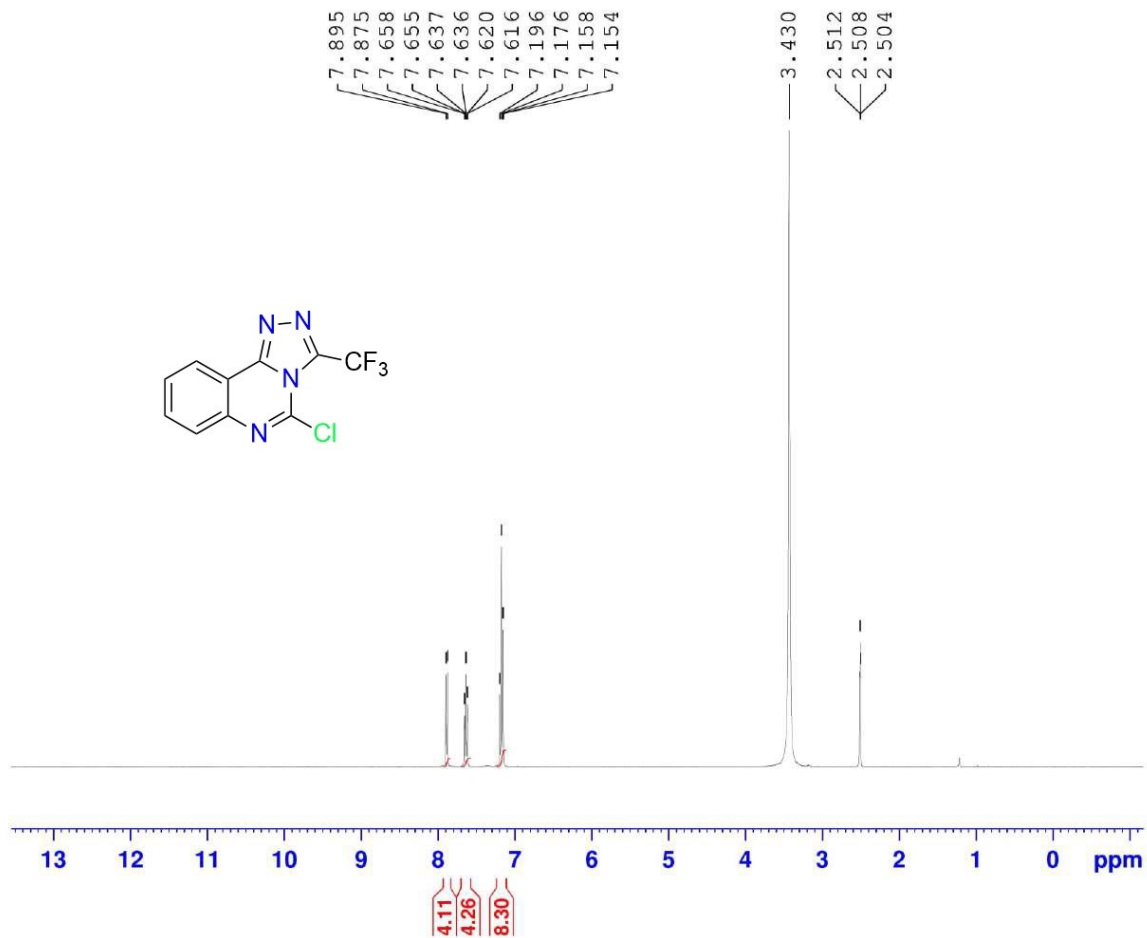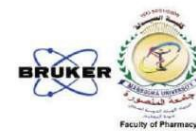

Current Data Parameters  
NAME Mohamed Hamed-PrH1-DMSO-Hnmr-A  
EXPNO 10  
PROCNO 1

F2 - Acquisition Parameters  
Date\_ 20181227  
Time 12.51 h  
INSTRUM spect  
PROBHD Z108618\_0945 (   
PULPROG zg30  
TD 65536  
SOLVENT DMSO  
NS 16  
DS 2  
SWH 8012.820 Hz  
FIDRES 0.244532 Hz  
AQ 4.0894465 sec  
RG 99.3  
DW 62.400 usec  
DE 6.50 usec  
TE 292.0 K  
D1 1.00000000 sec  
TD0 1  
SFO1 400.2024712 MHz  
NUC1 1H  
P1 13.50 usec  
PLW1 13.00000000 W

F2 - Processing parameters  
SI 65536  
SF 400.2000000 MHz  
WDW EM  
SSB 0  
LB 0.30 Hz  
GB 0  
PC 1.00

# Mass Spectrum of Compound 24

C:\Xcalibur\...S\mohamed-hamed-TFH1-one

THE REGIONAL CENTER FOR MYCOLOGY AND BIOTECHNOLOGY  
AZ-HAR UNIVERSITY

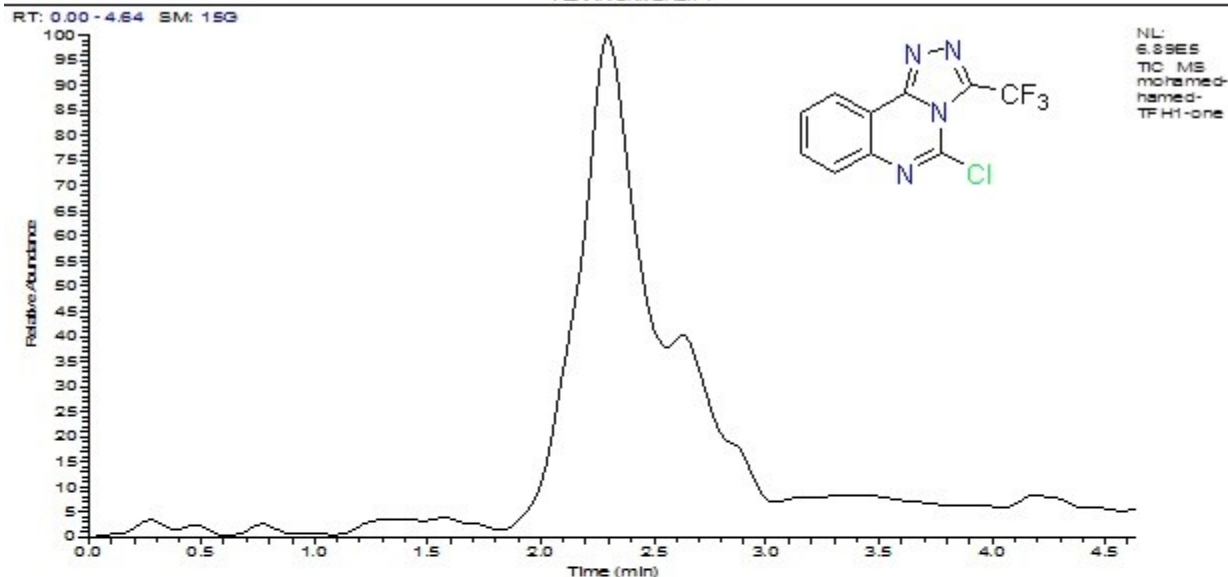

mohamed-hamed-TFH1-one #156 RT: 2.63 AV: 1 SB: 2 4.46, 4.46 NL: 3.12E4  
T: (0,0) + c EI Full ms [40.00-1000.00]

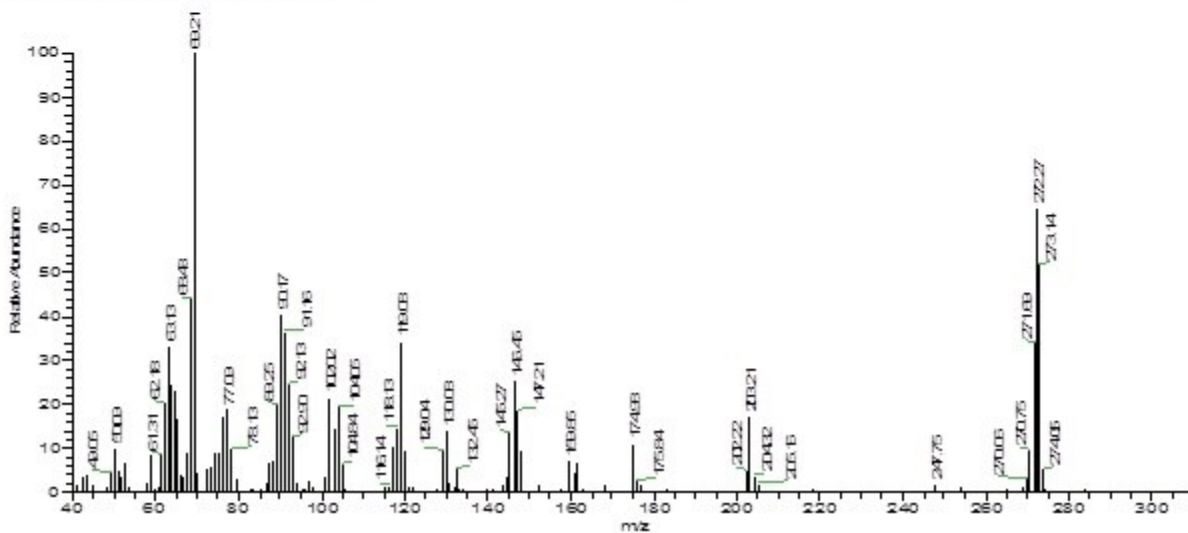

IR spectrum of compound 27

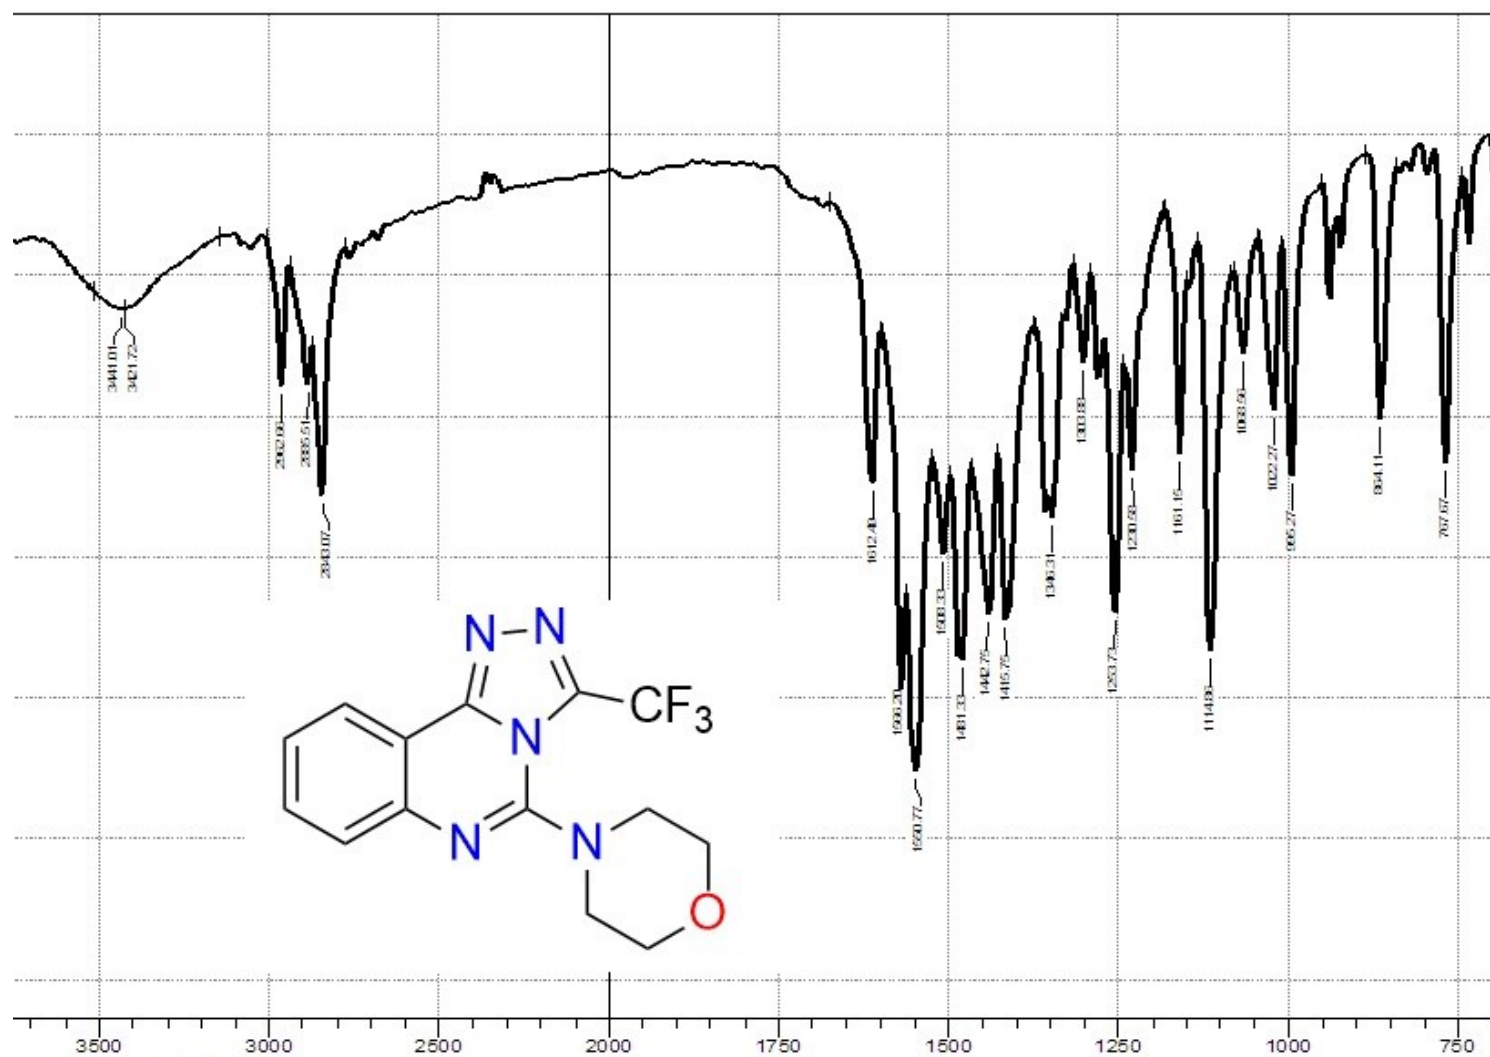

# <sup>1</sup>H NMR Spectrum of compound 27

Mohamed Hamed-TFH5morph-DMSO-Hnmr-A

Microanalytical Unit - FOPCU - NMR laboratory  
www.pharma.cu.edu.eg dir-mas.fopcu@pharma.cu.edu.eg

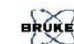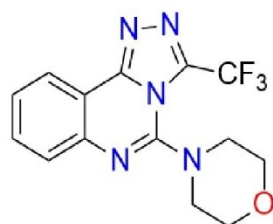

7.79  
7.78  
7.58  
7.57  
7.40  
7.40  
7.14  
7.13  
7.13

3.68  
3.66  
3.65  
3.61  
3.60  
3.59

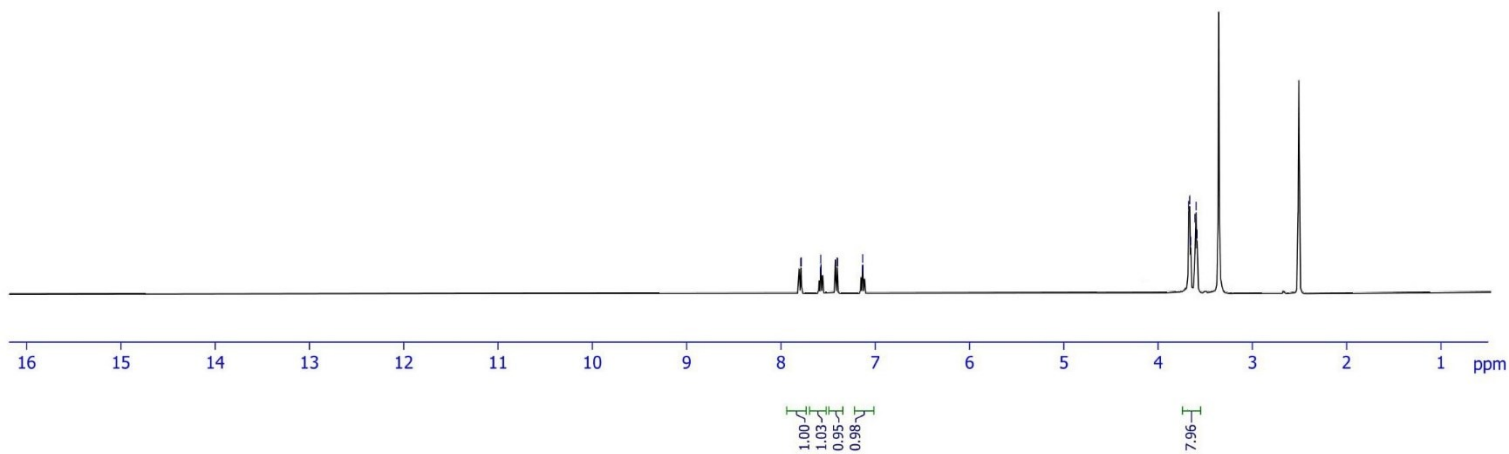

# Mass Spectrum of Compound 27

mohamed-hamed-TFH-5-morph

THE REGIONAL CENTER FOR MYCOLOGY AND BIOTECHNOLOGY  
AZHAR UNIVERSITY

RT: 0.00 - 4.54 SM: 15G

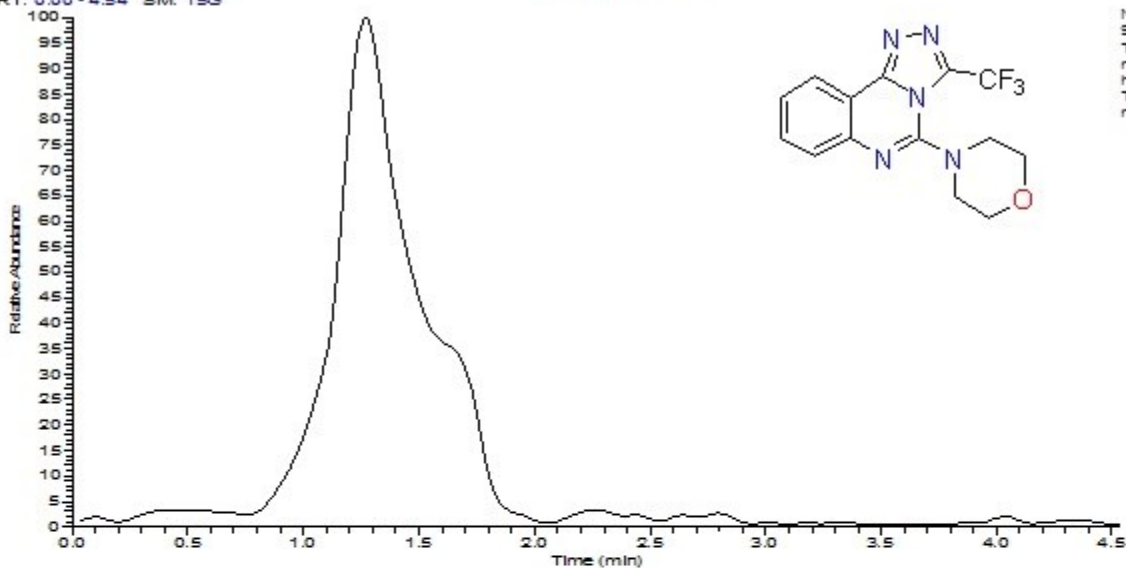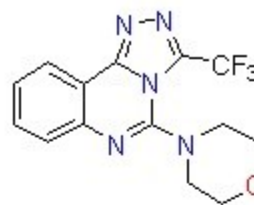

NL: S 36E5  
TC: MS  
mohamed-  
hamed-5-  
TFH-5-  
morph

mohamed-hamed-TFH-5-morph#111 RT: 1.87 AV: 1 SB: 2 4.45, 4.45 NL: 8.90E2  
T: (0.0) + c EI Full ms [40.00-1000.00]

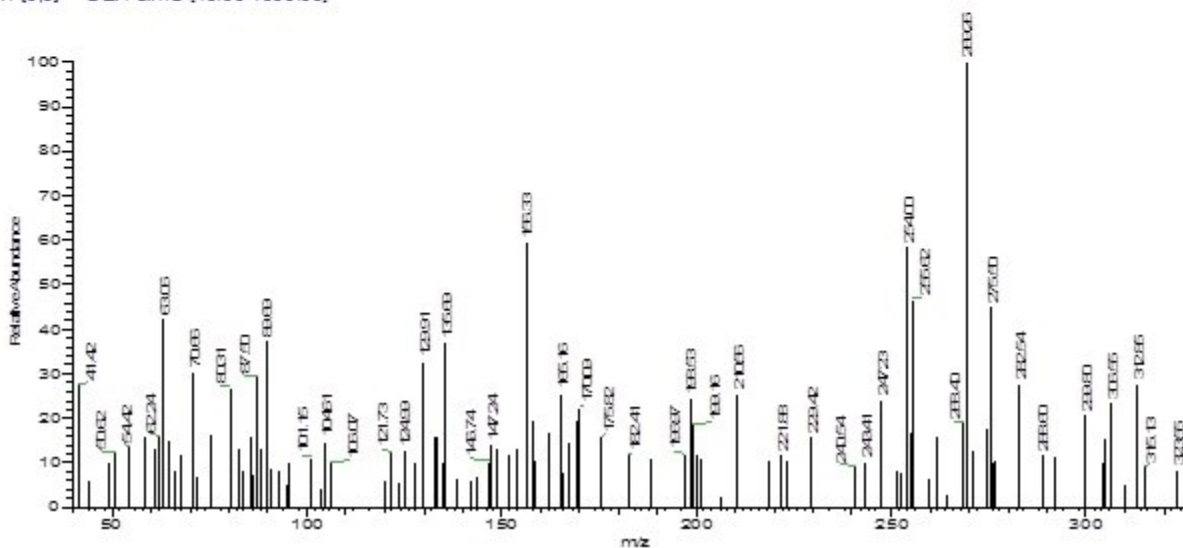

# IR spectrum of compound 28

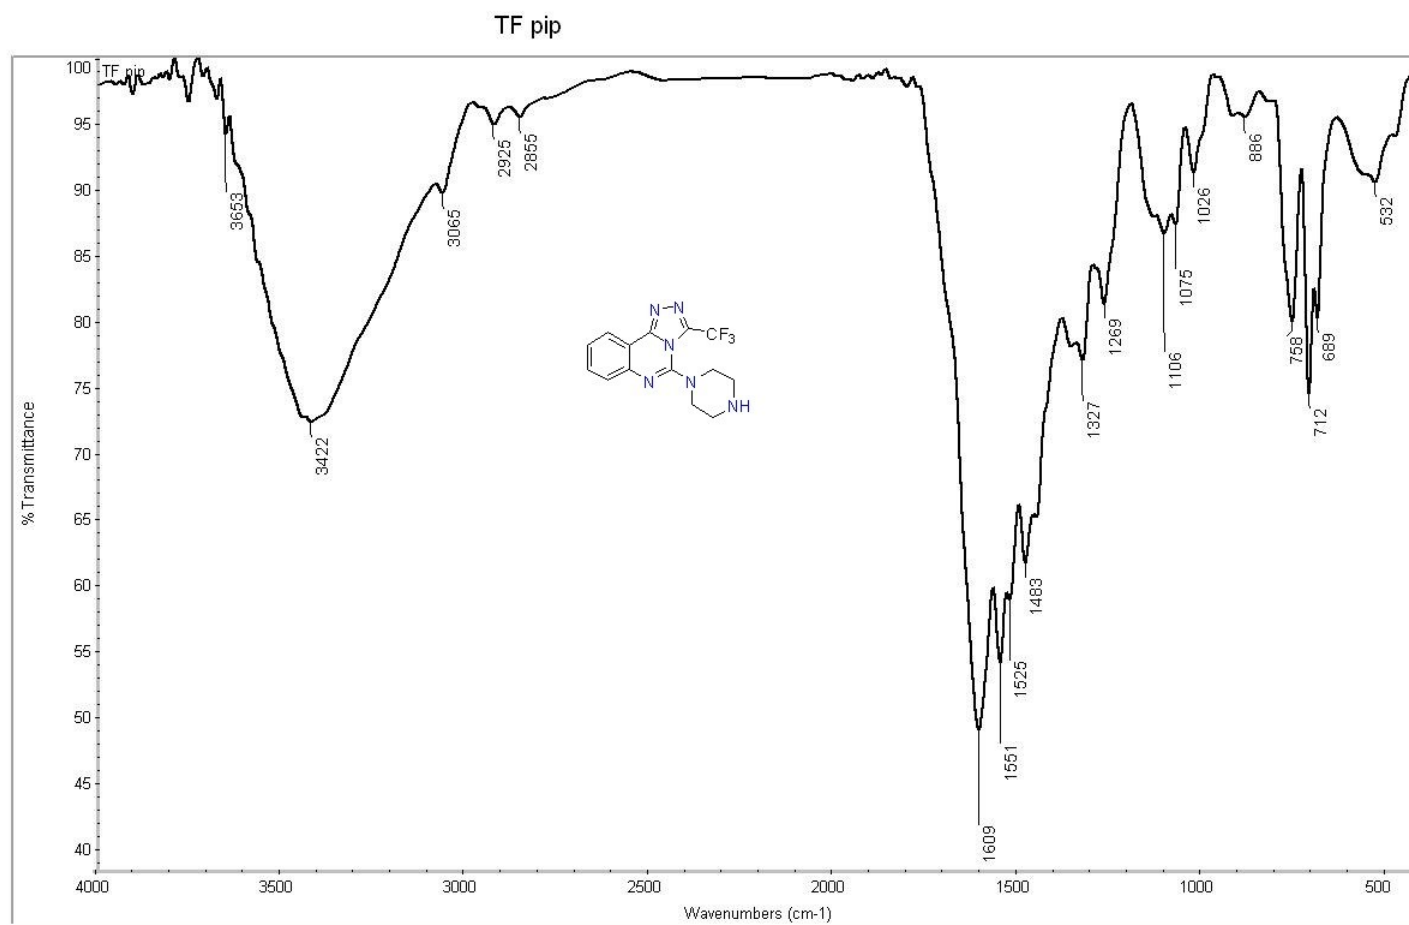

# IR spectrum of compound 29

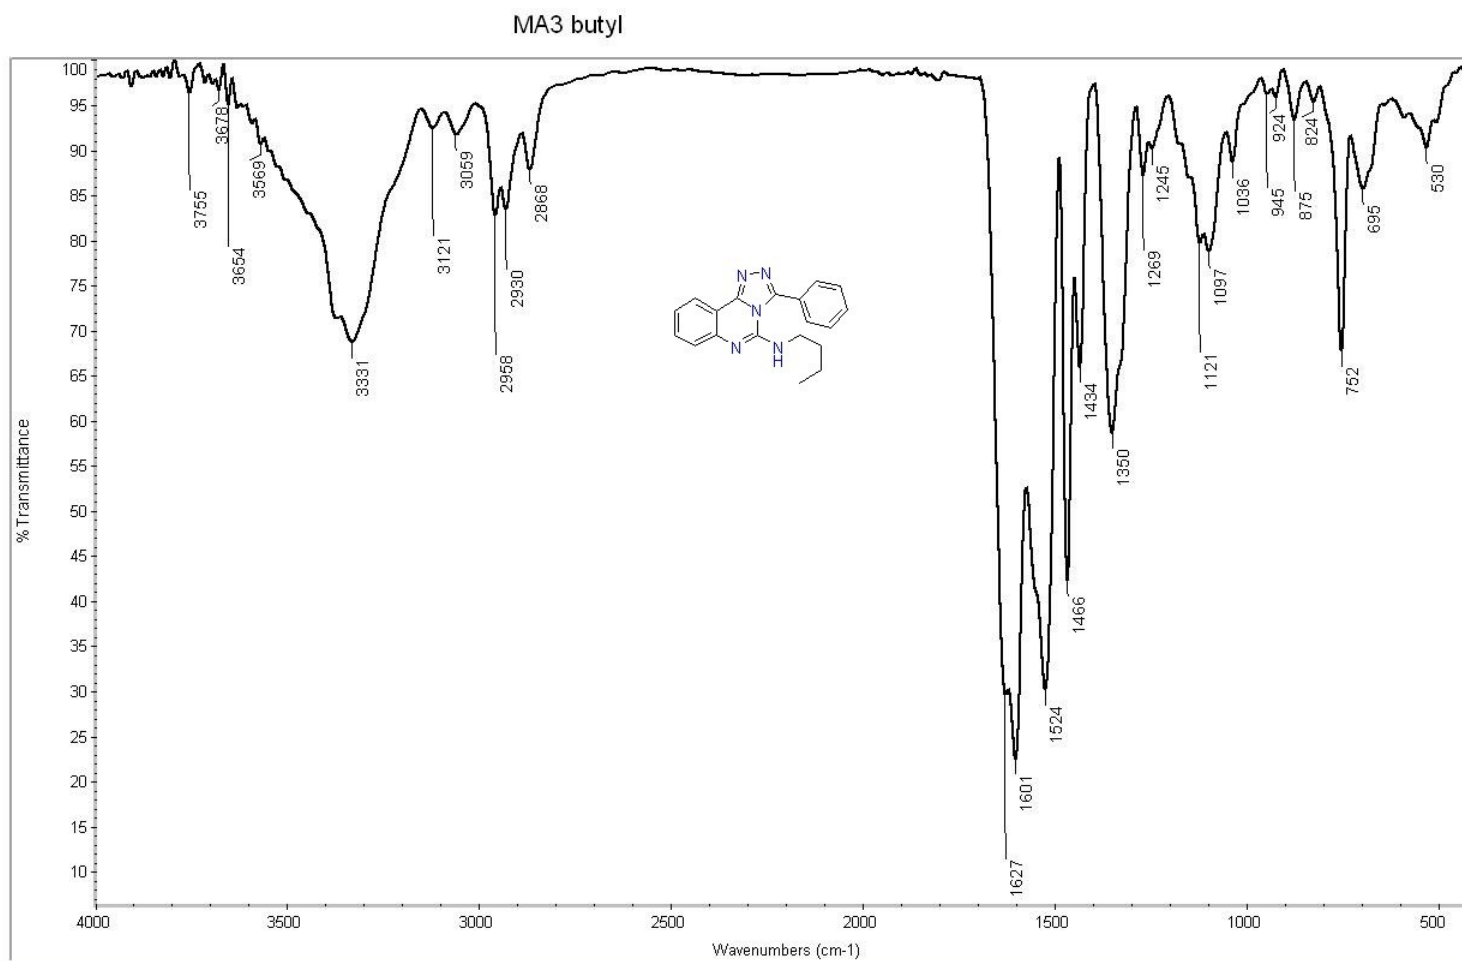

# Mass Spectrum of Compound 29

C:\Ocalbul\...mohamed-hamed-ma3-buty\_2

THE REGIONAL CENTER FOR MYCOLOGY AND BIOTECHNOLOGY  
AZHAR UNIVERSITY

RT: 2.40 - 4.00 SM: 15G

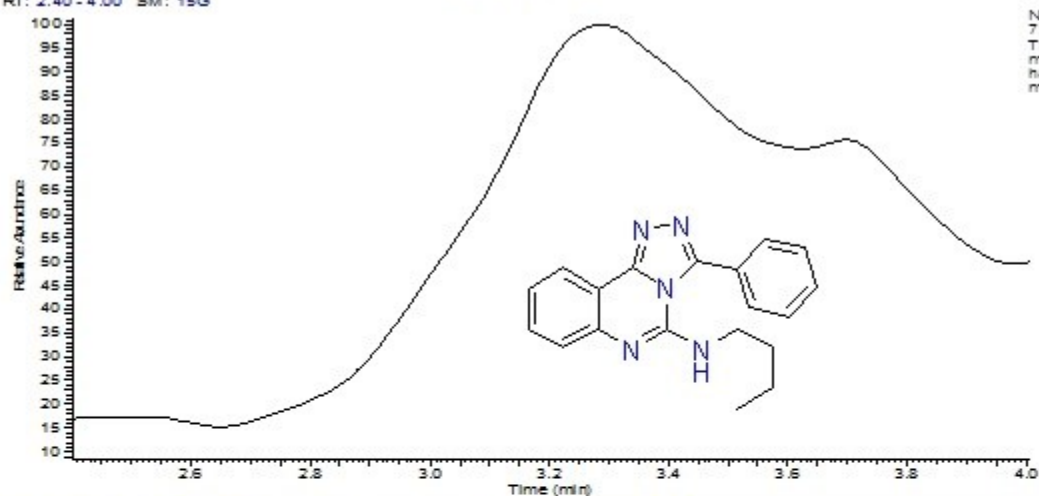

NL: 7.87E4  
TIC: MS  
mohamed-hamed-ma3-buty\_2

mohamed-hamed-ma3-buty\_2 #201 RT: 3.38 AV: 1 SB: 2 4.45 4.45 NL: 8.43E3  
T: (0.0) - c EI Full ms [40.00-1000.00]

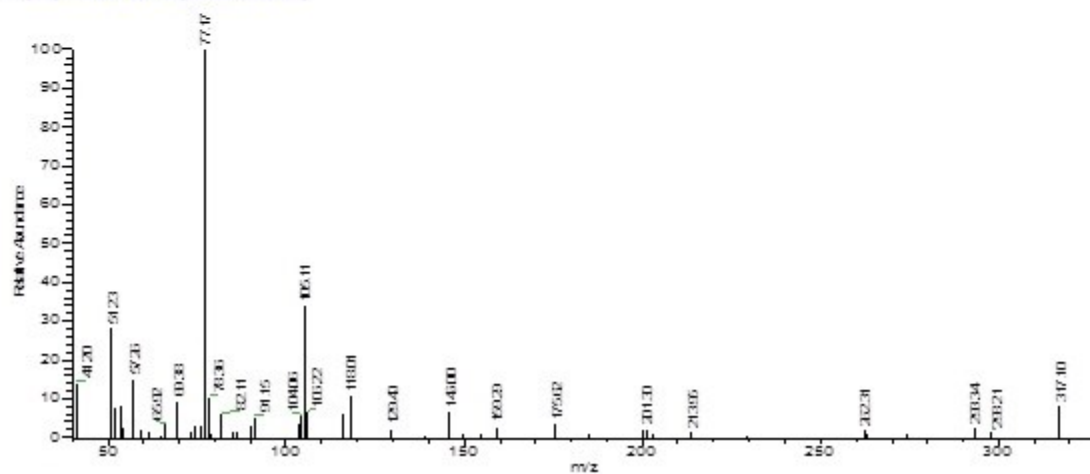



# IR spectrum of compound 31

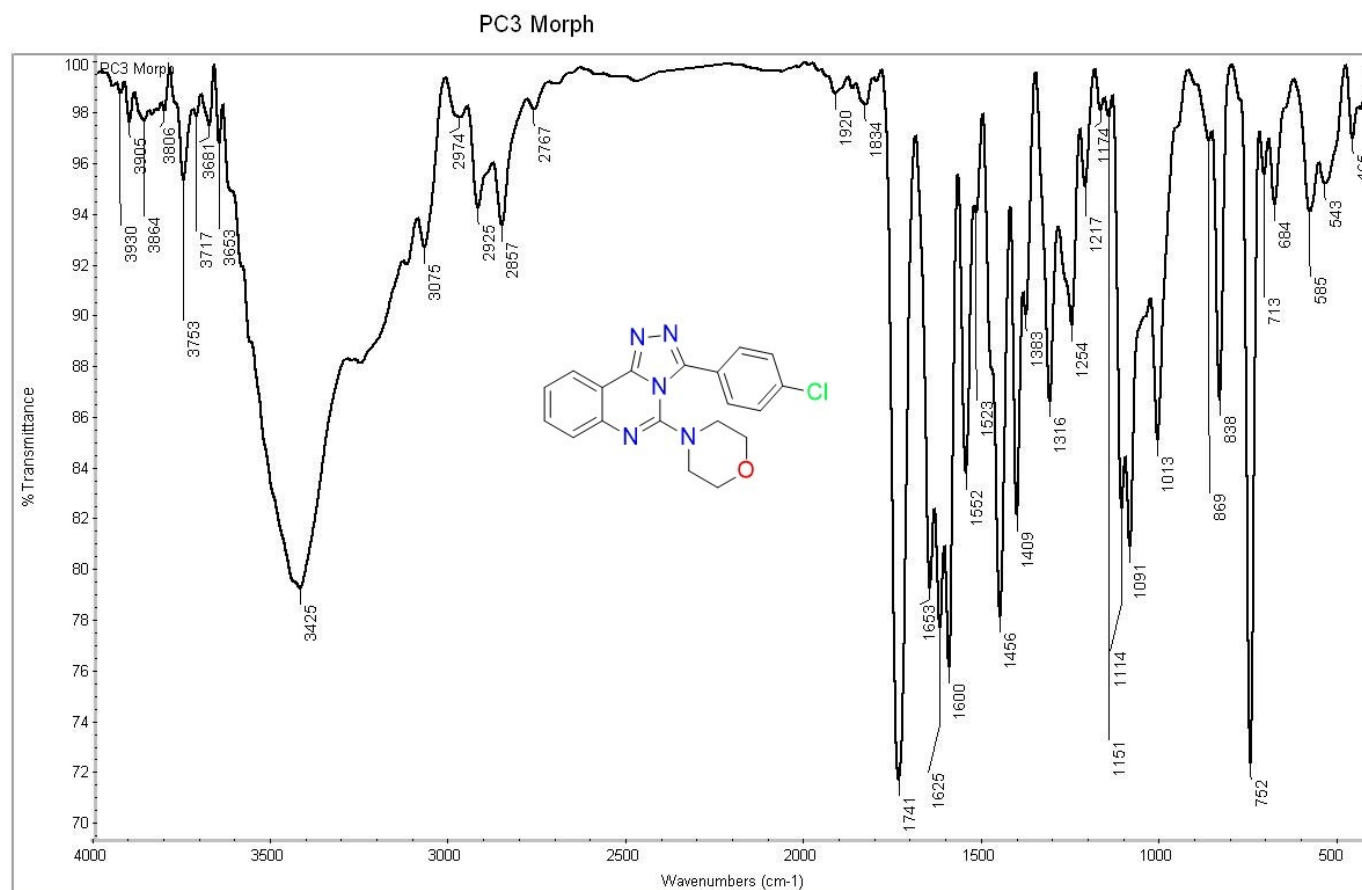

# <sup>1</sup>H NMR Spectrum of compound 31

Mohamed ElShershaby\_H\_PC3Morp

Microanalytical Unit - FOPCU - NMR laboratory  
www.pharma.cu.edu.eg dir-mau.fopcu@pharma.cu.edu.eg

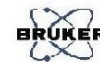

8.44  
8.42  
8.26  
8.24  
8.04  
8.02  
7.67  
7.65  
7.44  
7.42  
7.40  
7.14  
7.12  
7.10  
3.70  
3.68  
3.67  
3.58  
3.57  
3.56  
3.35  
2.51

Current Data Parameters

Name Mohamed ElShershaby\_H\_PC3Morp

EXPNO 10

PROCNO 1

F2 - Acquisition Parameters

Date 20200216

Time 13.59

Instrument spect

PROBHD 5 mm PABBO BB/

PULPROG zg30

TD 65536

Solvent DMSO

NS 32

DS 2

SWH 3012.320 Hz

FIDRES 0.122266 Hz

AQ 4.089465 sec

RG 180.8

DW 62.400 Usec

DE 6.50 Usec

TE 298.1

SI 1.0000

TD0 1

SFO1 400.1324713 MHz

NUC1 1H

P1 15.0000

PLW1 10.3999962 W

F2 - Processing parameters

SI 65536

SF 400.1900000 MHz

WDW EM

SSB 0

LB 0.30 Hz

GB 0

PC 1.00

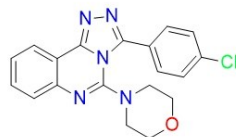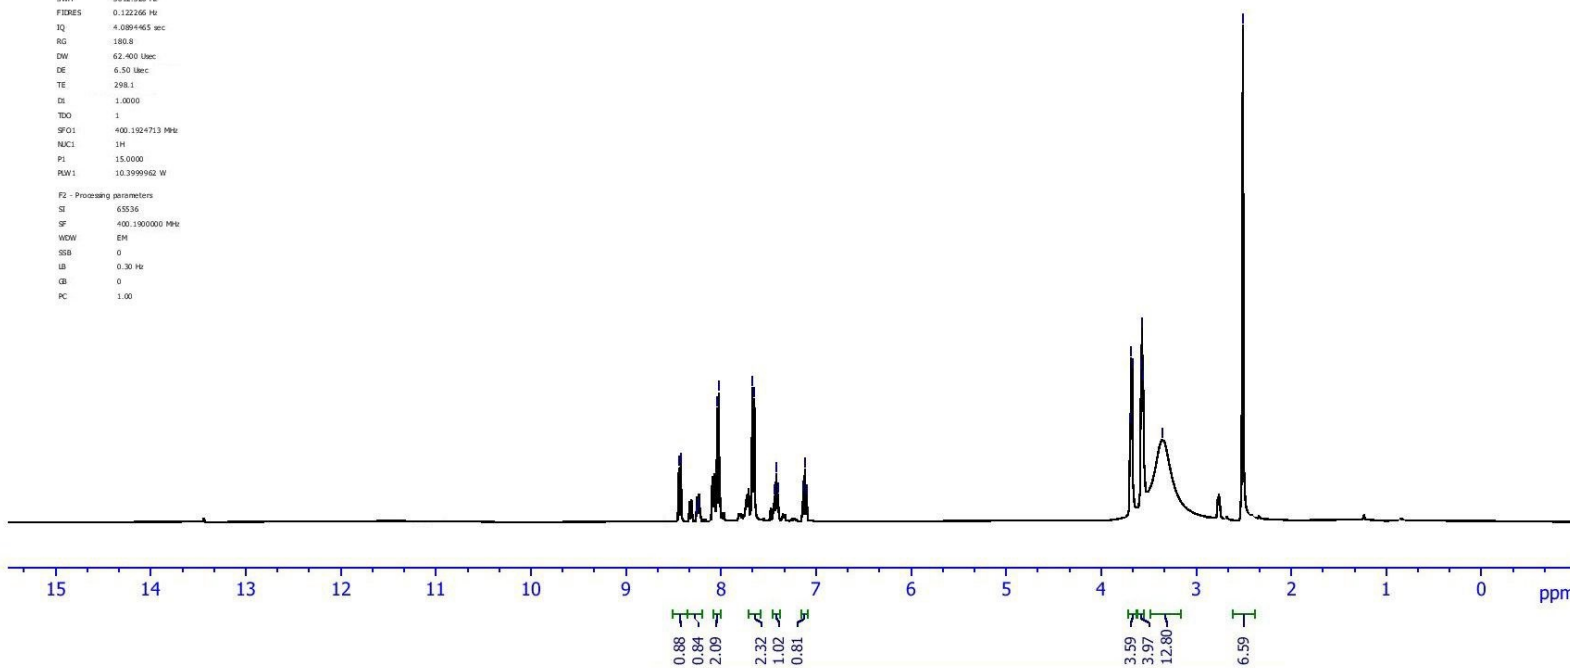

# <sup>13</sup>C NMR Spectrum of compound 31

Mohamed ElShershaby\_C\_PC3Morph

Microanalytical Unit - FOPCU - NMR laboratory  
www.pharma.cu.edu.eg dir-mau.fopcu@pharma.cu.edu.eg

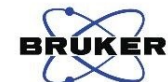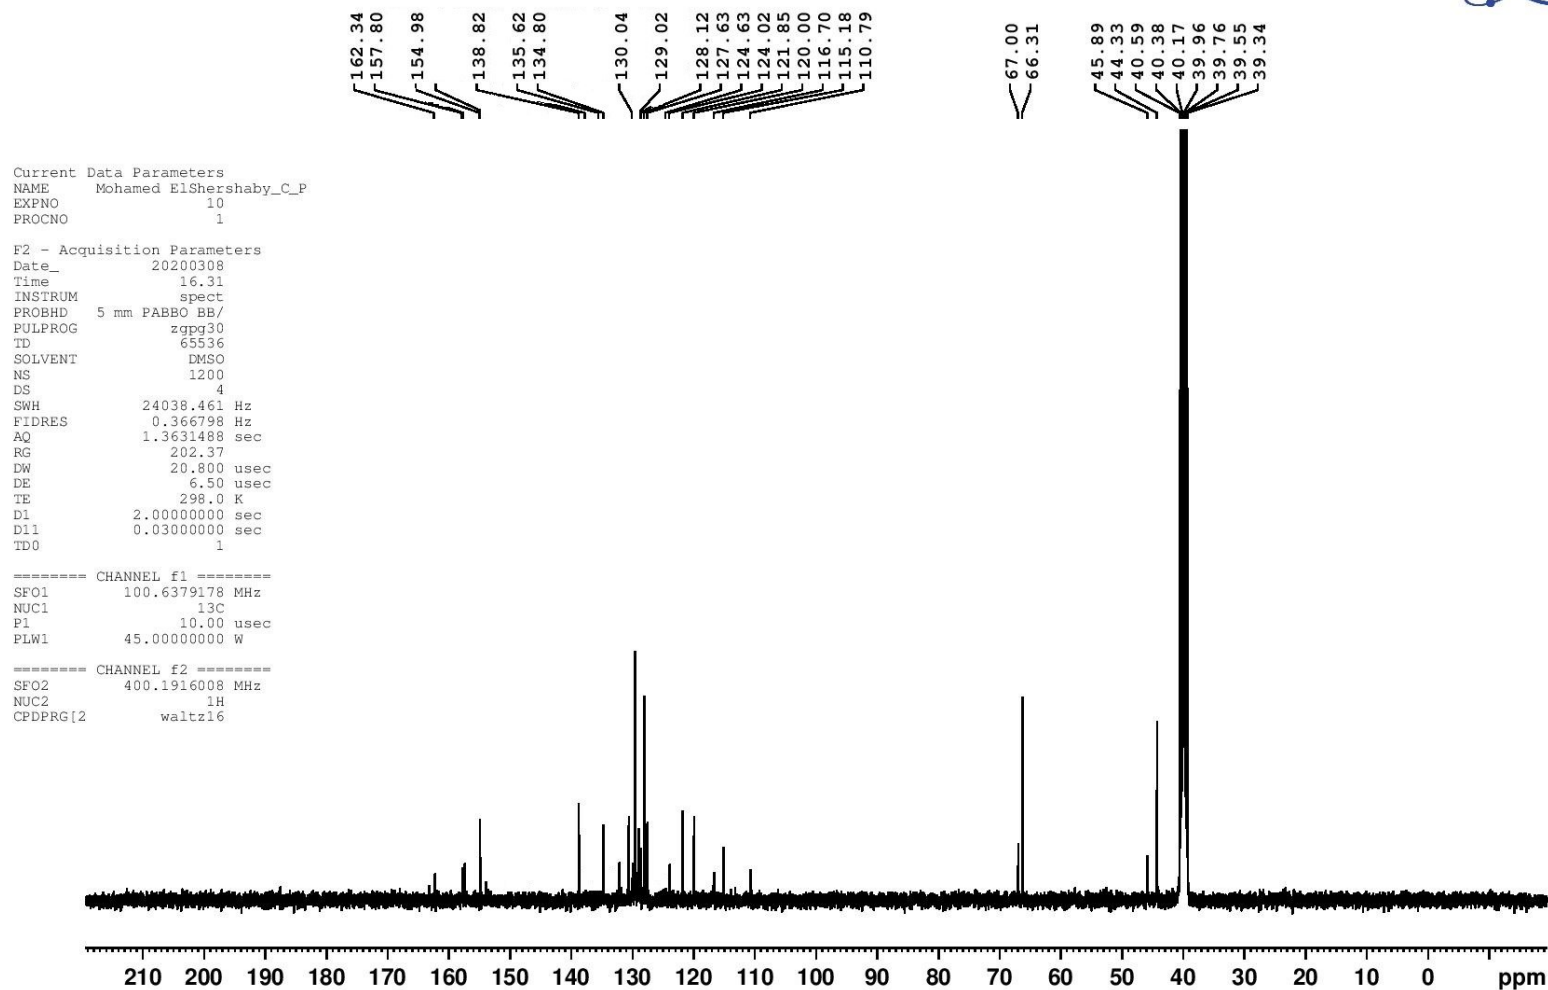

# Mass Spectrum of Compound 31

C:\lab\bu...m\chem\4-halmeq-c3-mor\_2

THE REGIONAL CENTER FOR MYCOLOGY AND BIOTECHNOLOGY  
ADHAR UNIVERSITY

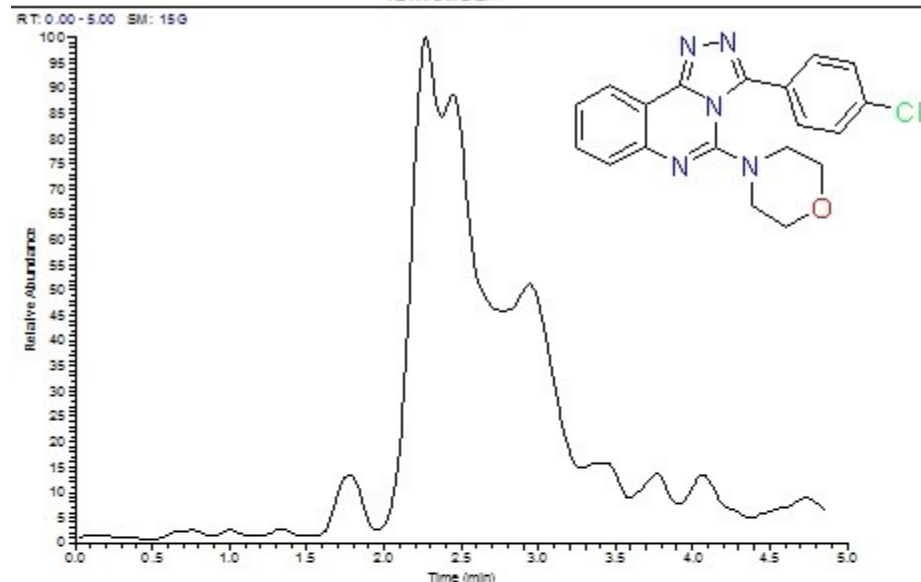

mole-medi-halmeq-c3-mor\_2#259 RT: 4.35 AV: 1 SE: 2 3.43, 3.38 NL: 38882  
T: (0.0) - c BiFulms (40.00-1000.00)

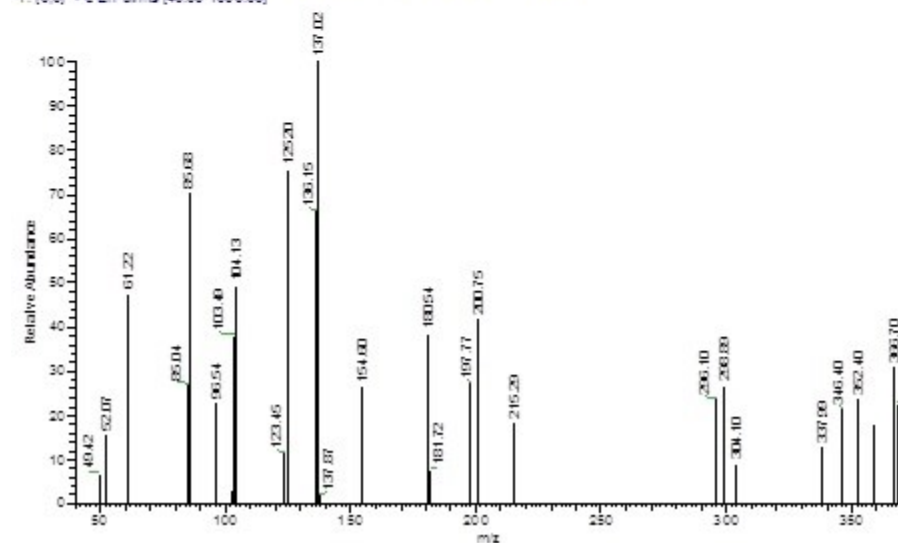

IR spectrum of compound 32

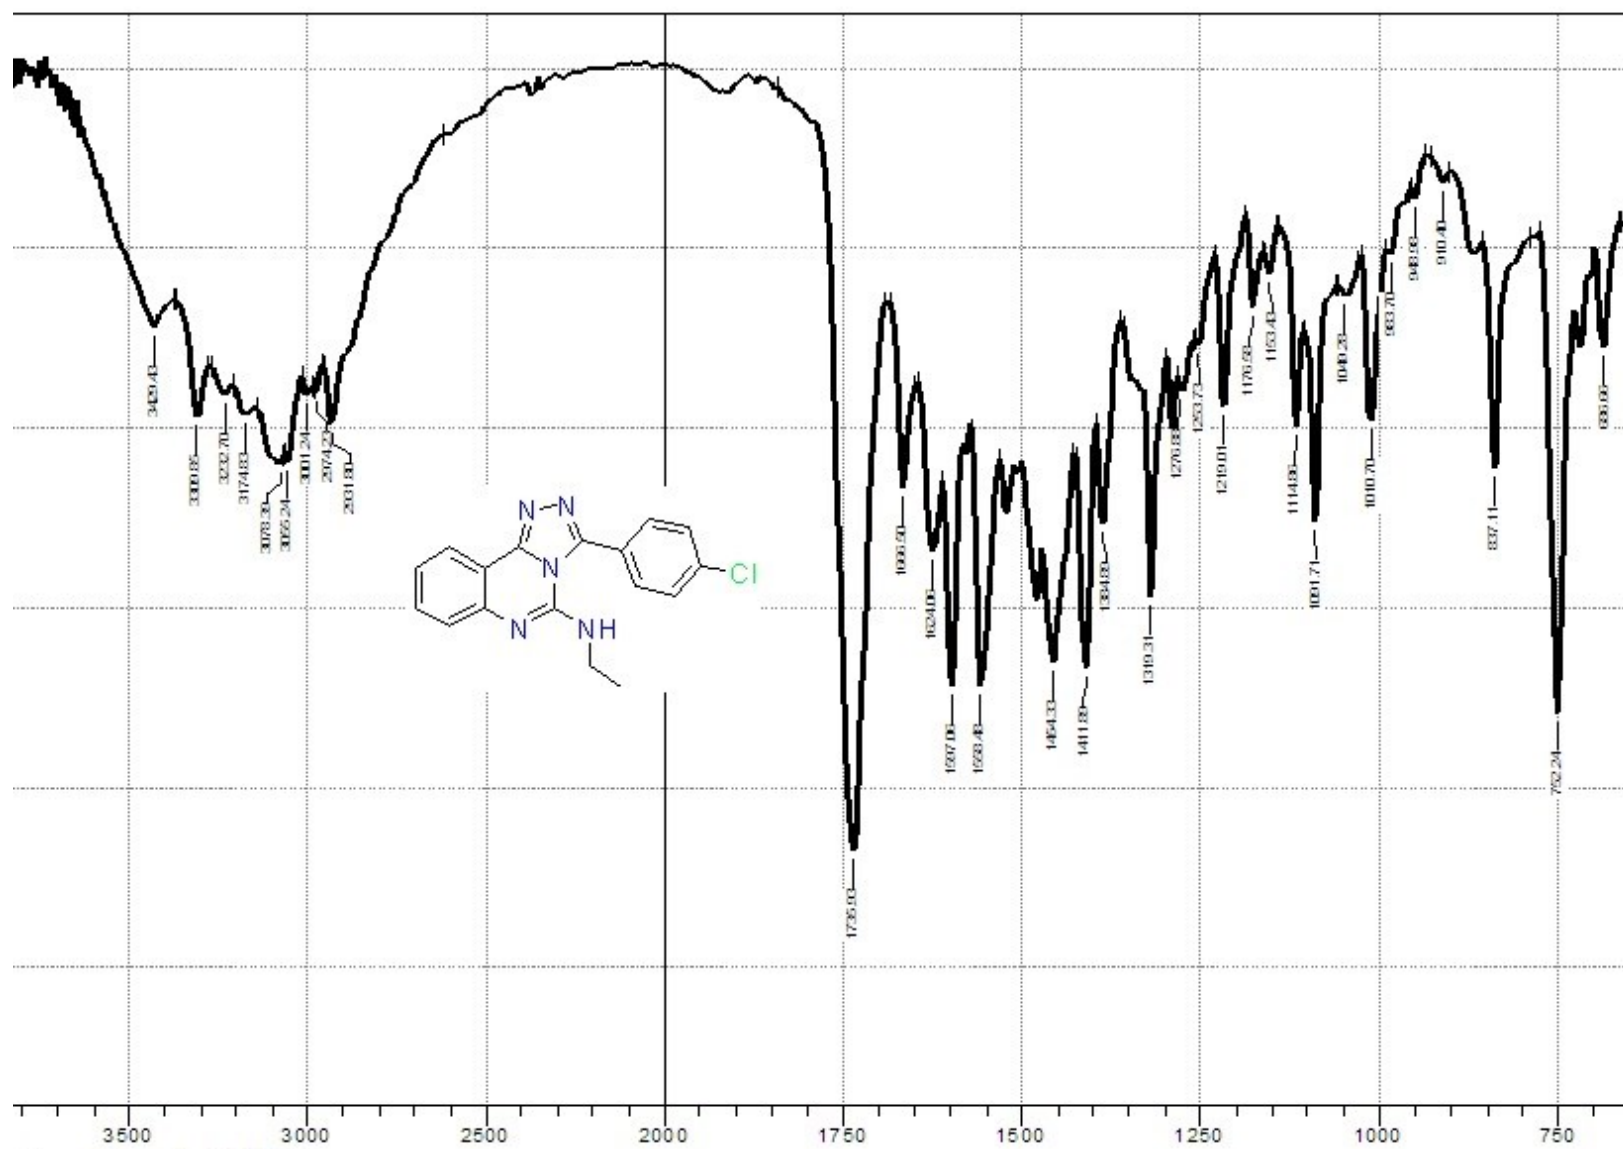

# <sup>1</sup>H NMR Spectrum of compound 32

Mohamed ElShershaby\_H\_PCI-ethyl

Microanalytical Unit - FOPCU - NMR laboratory  
www.pharma.cu.edu.eg dir-mau.fopcu@pharma.cu.edu.eg

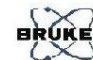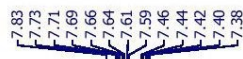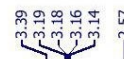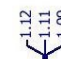

Current Data Parameters  
Name Mohamed ElShershaby\_H\_PCI-ethyl  
EXPMO 10  
PROCNO 1  
F2 - Acquisition Parameters  
Date 20200202  
Time 16.52  
Instrument spect  
PROBHD 5 mm PABBO BB/  
PULPROG zg30  
TD 65536  
Solvent DMSO  
NS 32  
DS 2  
SWH 3012.320 Hz  
FIDRES 0.122266 Hz  
SFO1 400.146500 MHz  
RG 202.4  
DW 62.400 Usec  
DE 6.50 Usec  
TE 298.1  
DS 1.0000  
TDO 1  
SFO1 400.146500 MHz  
NUC1 1H  
P1 15.0000  
PLW1 10.3999962 W  
F2 - Processing parameters  
SI 65536  
SF 400.146500 MHz  
WDW EM  
SSB 0  
GB 0.30 Hz  
CB 0  
PC 1.00

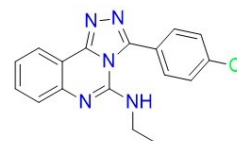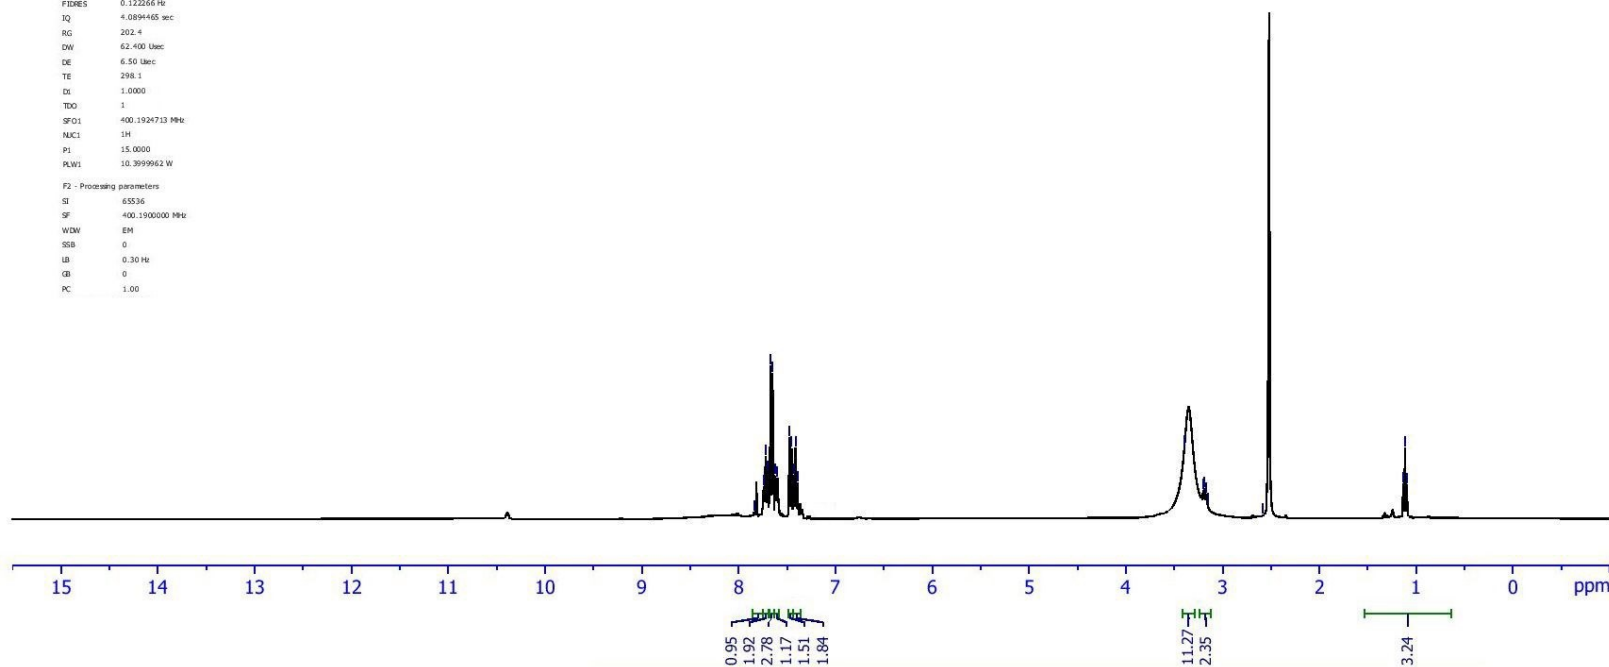

## Mass Spectrum of Compound 32

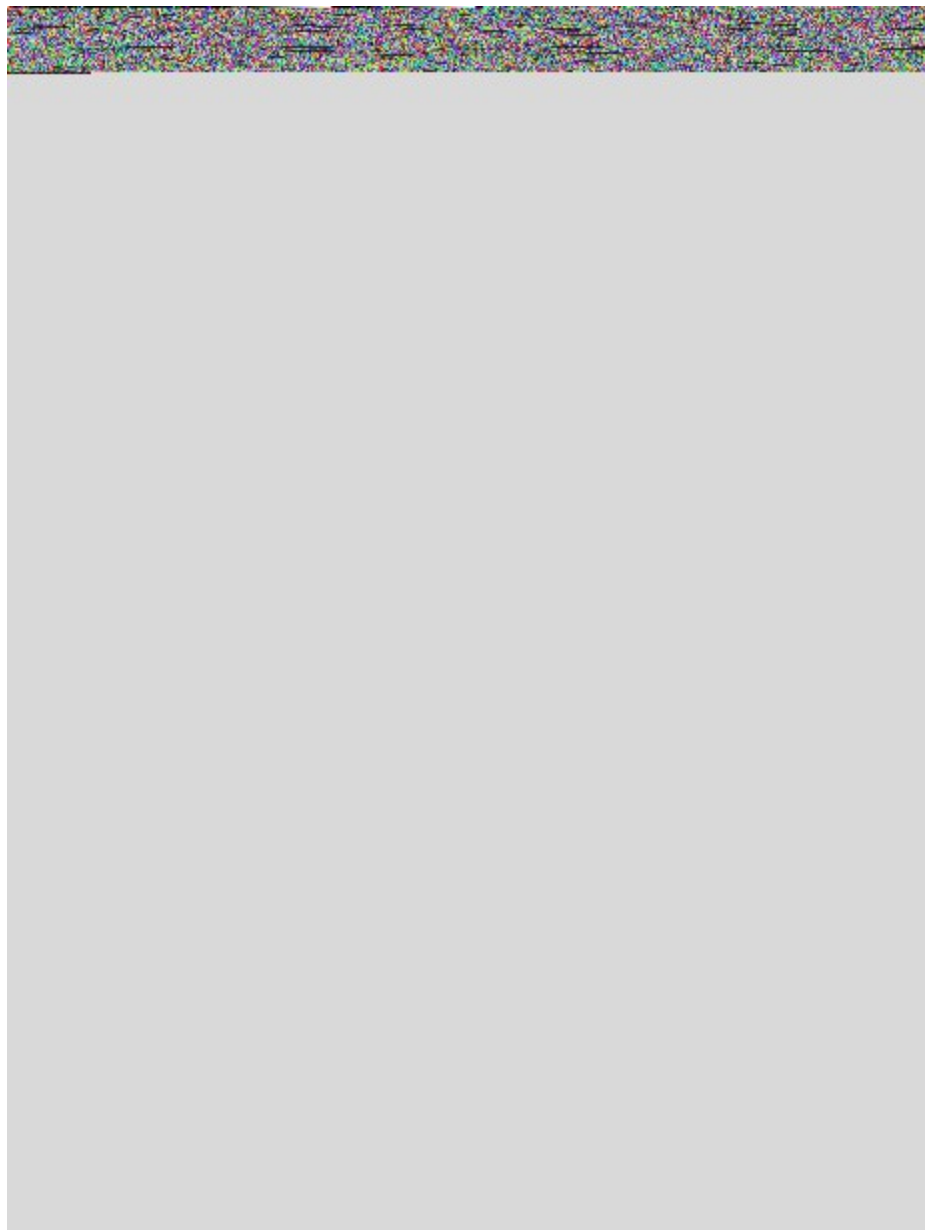

# IR spectrum of compound 33

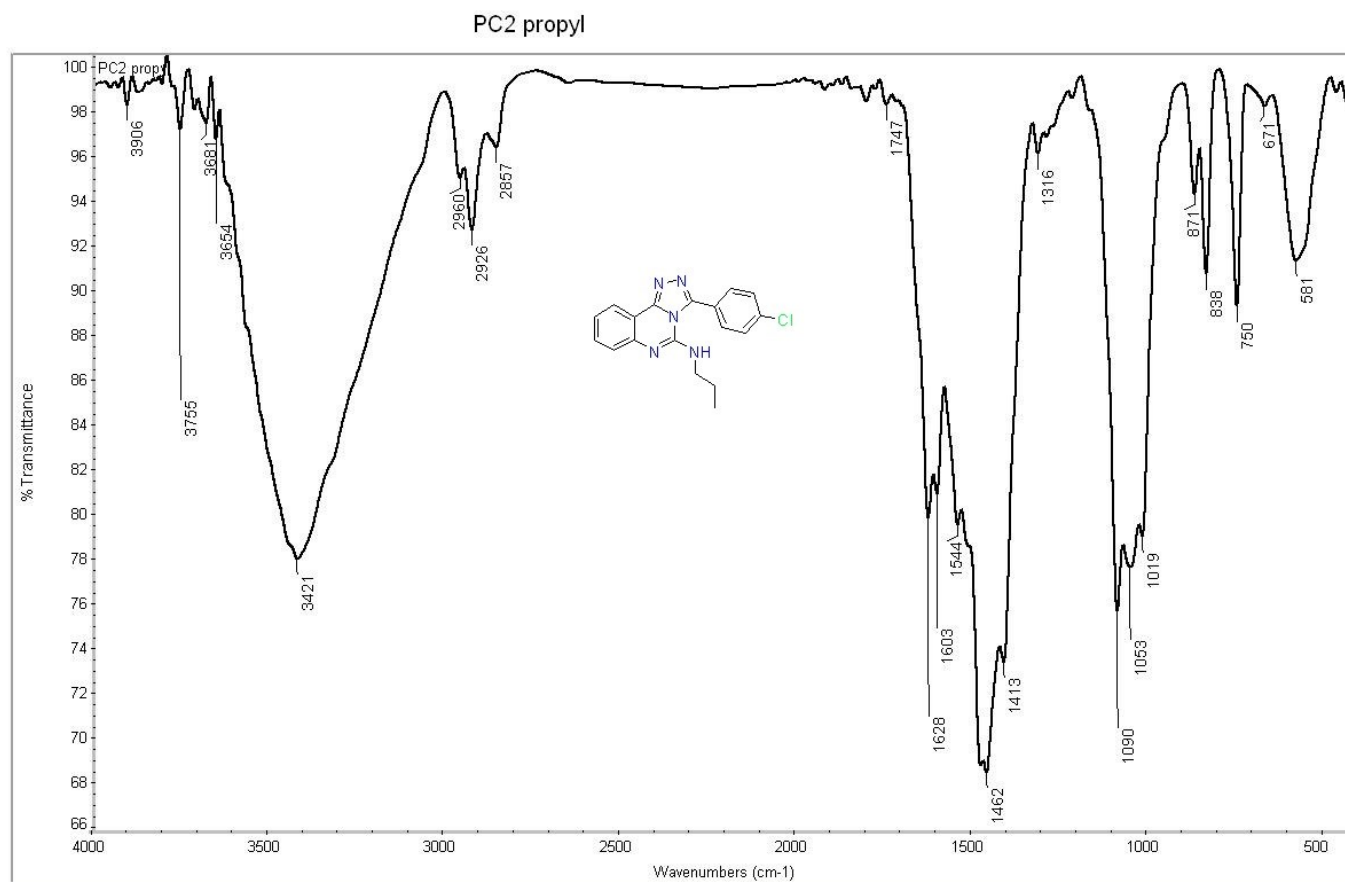



# <sup>1</sup>H NMR Spectrum of compound 33

Mohamed ElShershaby\_H\_PC2-propyl

Microanalytical Unit - FOPCU - NMR laboratory  
www.pharma.cu.edu.eg dir-mau.fopcu@pharma.cu.edu.eg

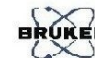

8.34  
8.32  
8.30  
8.20  
8.18  
8.16  
8.14  
8.12  
7.81  
7.80  
7.77  
7.74  
7.72  
7.72  
7.70  
7.67  
7.65  
7.64

3.60  
3.58  
3.56

1.31  
1.27  
1.24  
1.00  
0.98  
0.96  
0.92  
0.90  
0.88

Current Data Parameters  
Name Mohamed ElShershaby\_H\_PC2-propyl  
EXPNO 10  
PROCNO 1  
F2 - Acquisition Parameters  
Date\_ 20200202  
Time 16.57  
Instrument spect  
PROBHD 5 mm PABBO AB/  
PULPROG zgpg  
TD 65536  
Solvent DMSO  
NS 32  
DS 2  
SWH 3012.320 Hz  
FIDRES 0.122266 Hz  
AQ 4.0894465 sec  
RG 202.4  
DW 62.400 Usec  
DE 6.50 Usec  
TE 298.1  
DS 1.0000  
TDO 1  
SFO1 400.1924713 MHz  
NUC1 1H  
P1 15.0000  
PLW1 10.3999962 W  
F2 - Processing parameters  
SI 65536  
SF 400.1900000 MHz  
WDW EM  
SSB 0  
LB 0.30 Hz  
GB 0  
PC 1.00

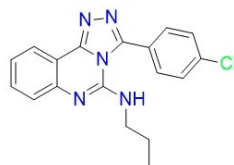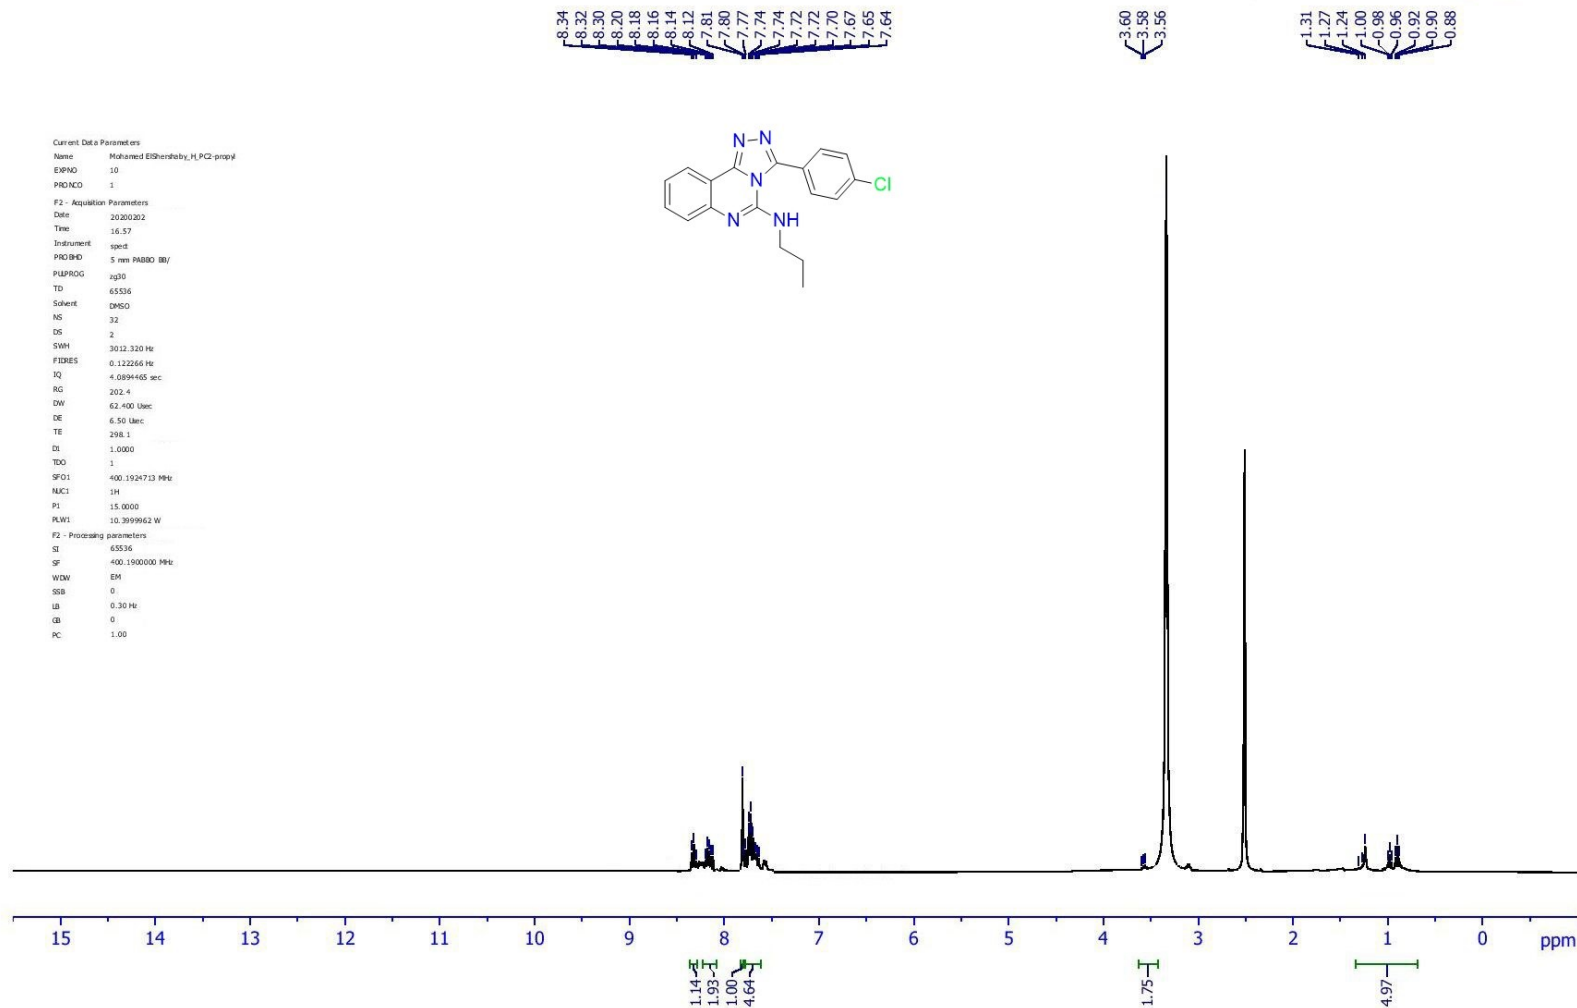

# Mass Spectrum of Compound 33

mohamed-hamed-pc2-propyle\_2

THE REGIONAL CENTER FOR MYCOLOGY AND BIOTECHNOLOGY  
AZHAR UNIVERSITY

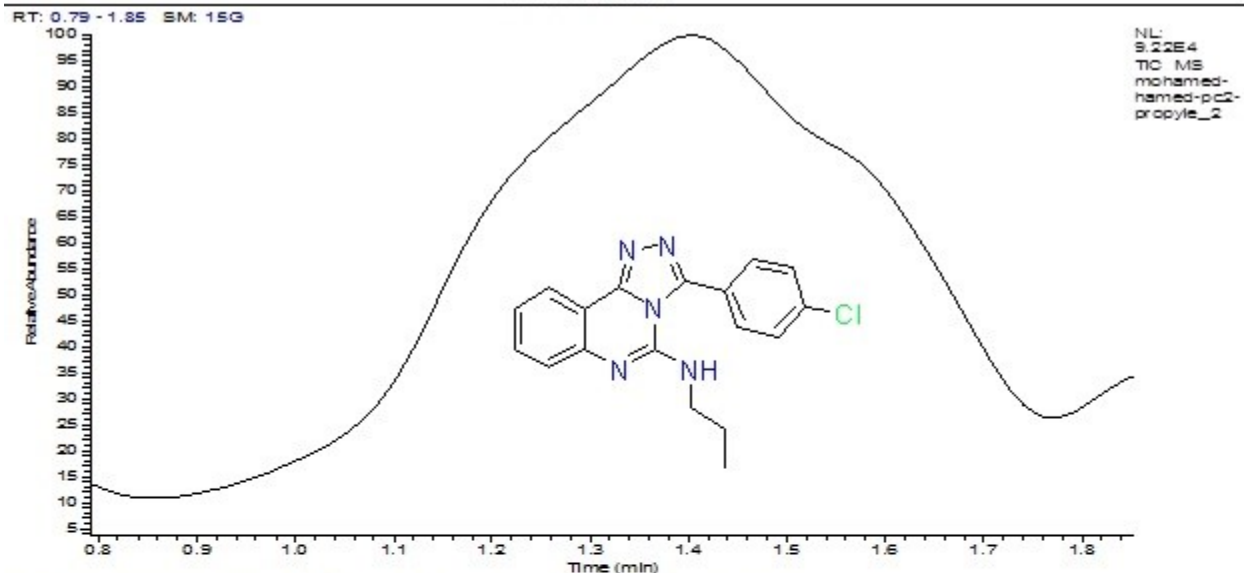

mohamed-hamed-pc2-propyle\_2 #87 RT: 1.47 AV: 1 SB: 2 4.46, 4.46 NL: 3.04E3  
T: (0,0) + c EI Full ms (40.00-1000.00)

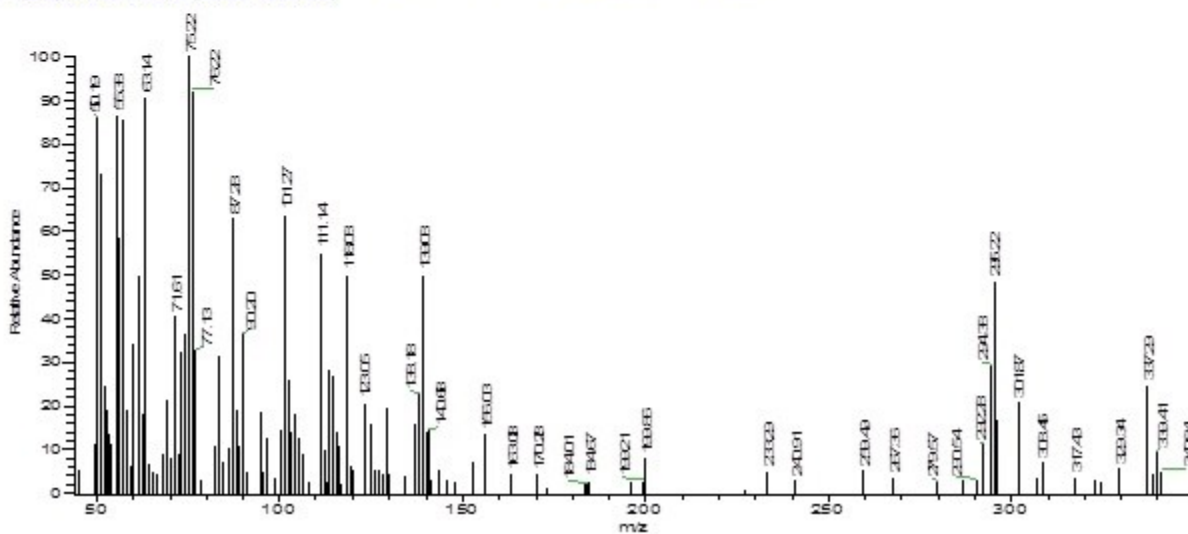

# IR spectrum of compound 34

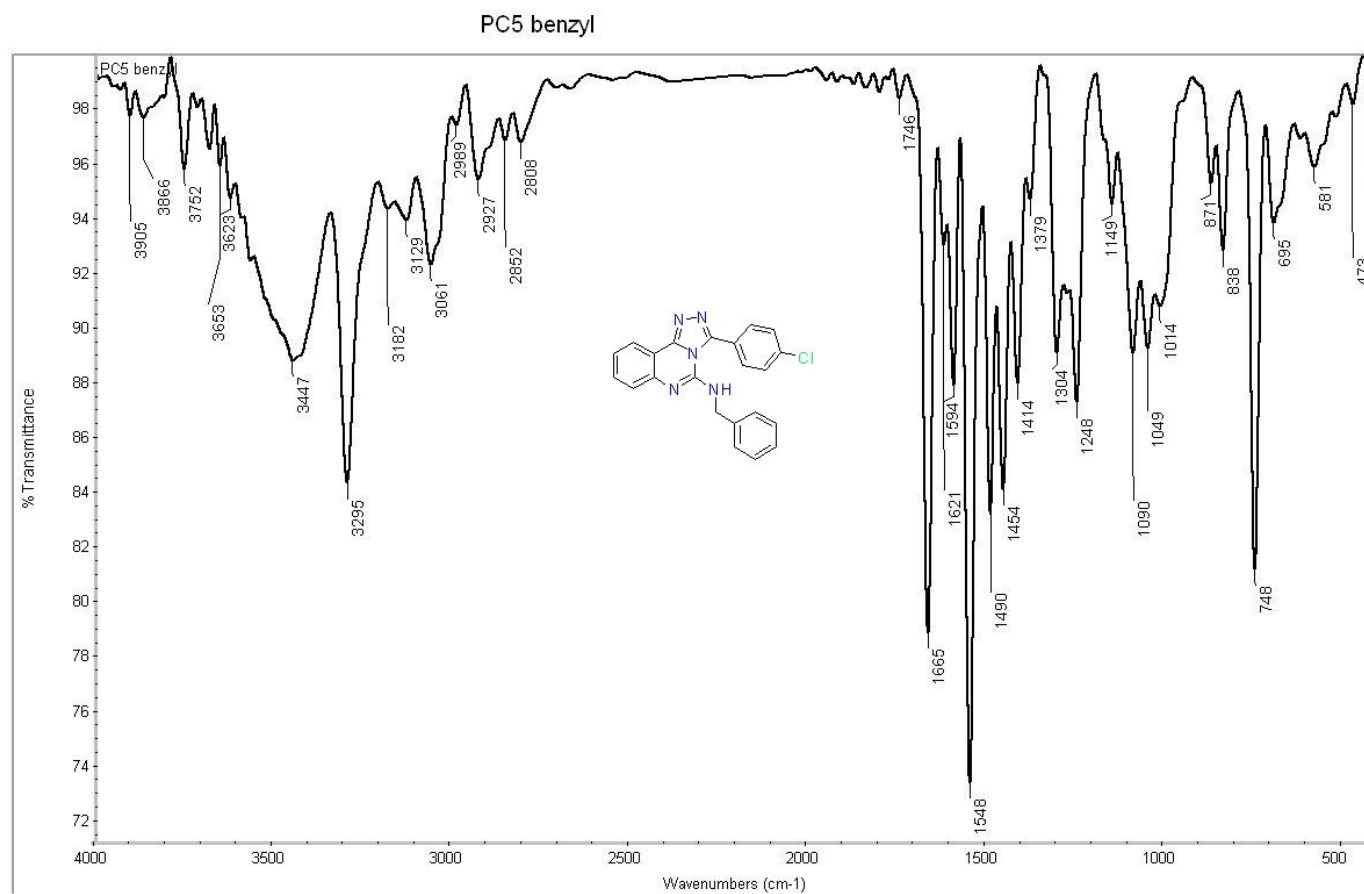

# <sup>1</sup>H NMR Spectrum of compound 34

Mohamed ElShershaby\_H\_PC5-benz

Microanalytical Unit - FOPCU - NMR laboratory  
www.pharma.cu.edu.eg dir-mau.fopcu@pharma.cu.edu.eg

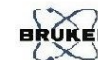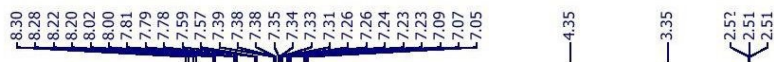

Current Data Parameters  
Name Mohamed ElShershaby\_H\_PC5-benz  
EXPNO 10  
PROCNO 1  
F2 - Acquisition Parameters  
Date 20200216  
Time 14.03  
Instrument spect  
PROBHD 5 mm PABBO BB/  
PULPROG zg30  
TD 65536  
Solvent DMSO  
NS 32  
DS 2  
SVM 3012.330 Hz  
FIDRES 0.122266 Hz  
AQ 4.089465 sec  
RG 180.8  
DW 62.400 Usec  
DE 6.50 Usec  
TE 298.1  
DS 1.0000  
TDO 1  
SFO1 400.1924713 MHz  
NUC1 1H  
P1 15.0000  
PLW1 10.3999962 W  
F2 - Processing parameters  
SI 65536  
SF 400.1900000 MHz  
WDW EM  
SSB 0  
GB 0.30 Hz  
CB 0  
PC 1.00

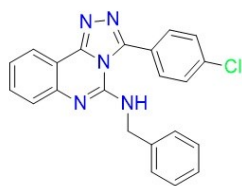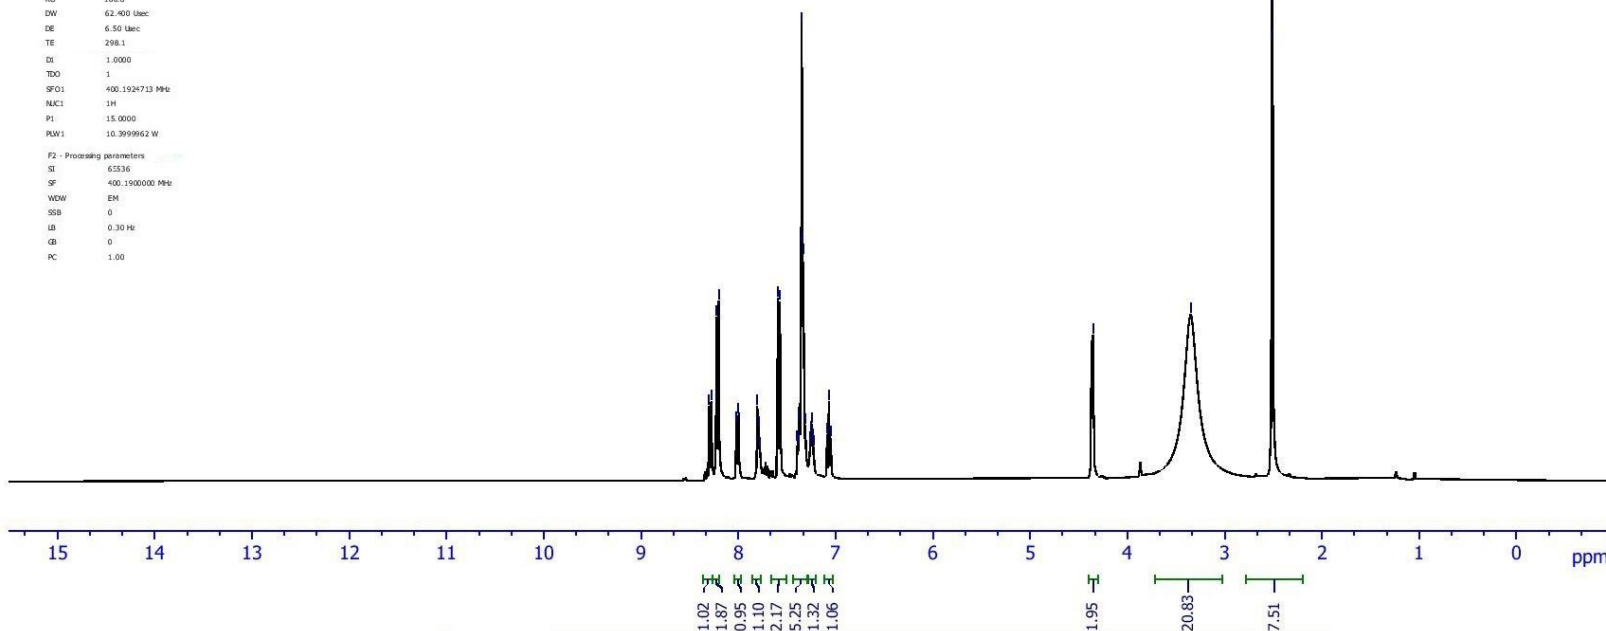

# <sup>13</sup>C NMR Spectrum of compound 34

Mohamed ElShershaby\_C\_PC5benz

Microanalytical Unit - FOPCU - NMR laboratory  
www.pharma.cu.edu.eg dir-mau.fopcu@pharma.cu.edu.eg

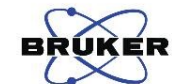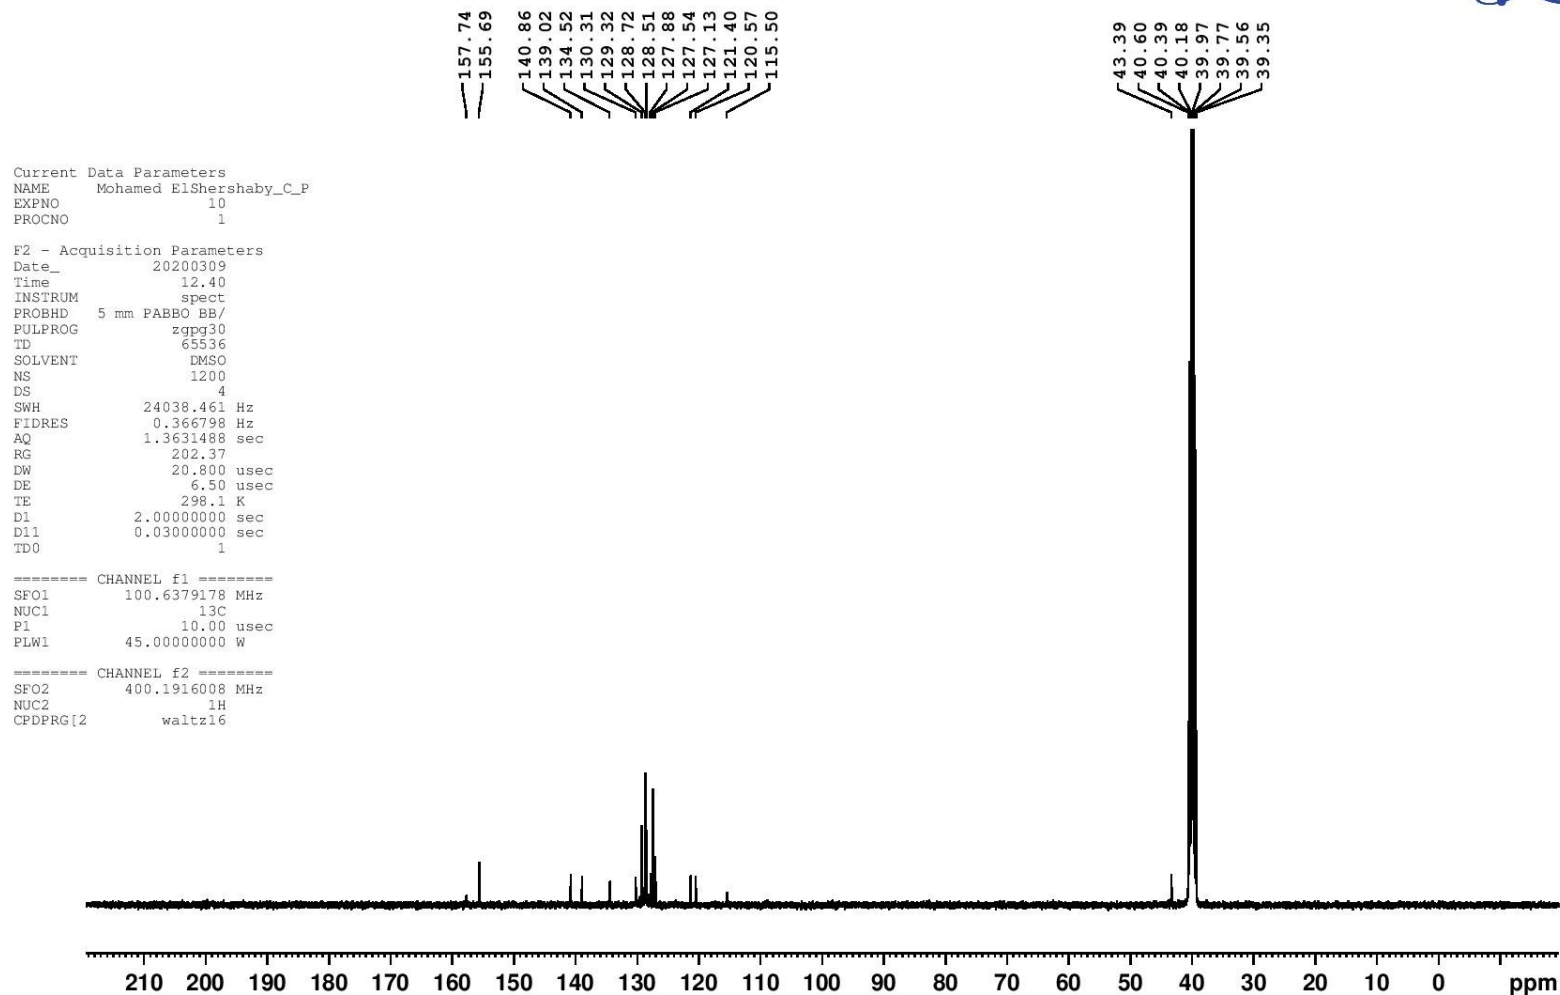

# Mass Spectrum of Compound 34

mohamed-hamed-TFH-5-morph

THE REGIONAL CENTER FOR MYCOLOGY AND BIOTECHNOLOGY  
AZHAR UNIVERSITY

RT: 0.00 - 4.54 SM: 15G  
100

NL:  
9.36EE

mohamed-hamed-TFH-5-morph

THE REGIONAL CENTER FOR MYCOLOGY AND BIOTECHNOLOGY  
AZHAR UNIVERSITY

RT: 0.00 - 4.54 SM: 15G

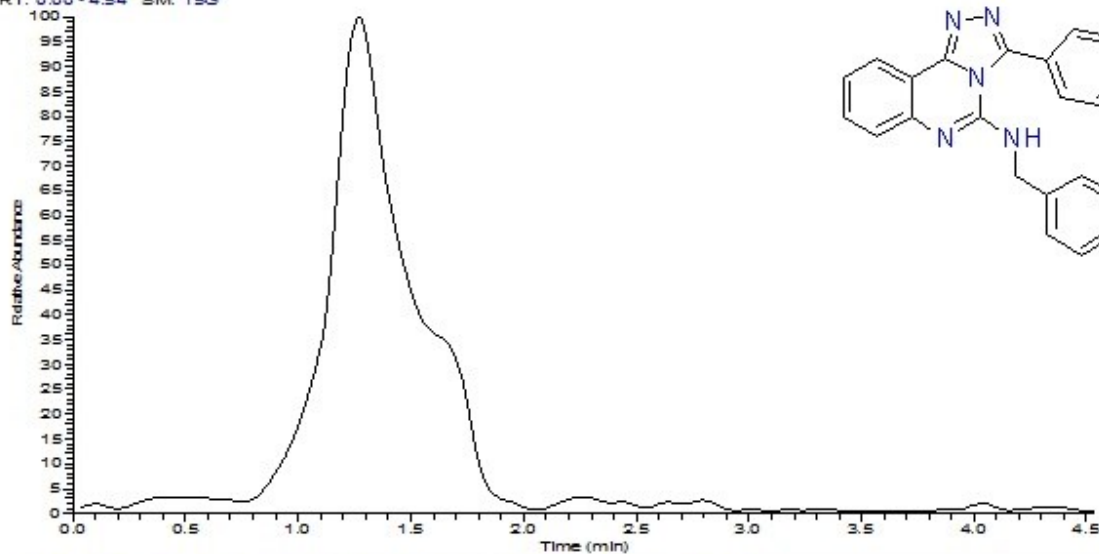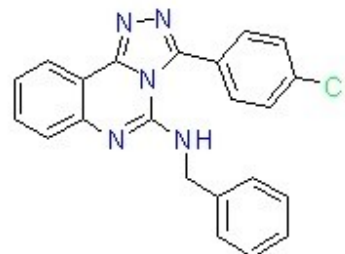

mohamed-hamed-TFH-5-morph#111 RT: 1.87 AV: 1 SB: 2 4.45, 4.45 NL: 8.90E2  
T: (0.0) + e EI Full ms [40.00-1000.00]

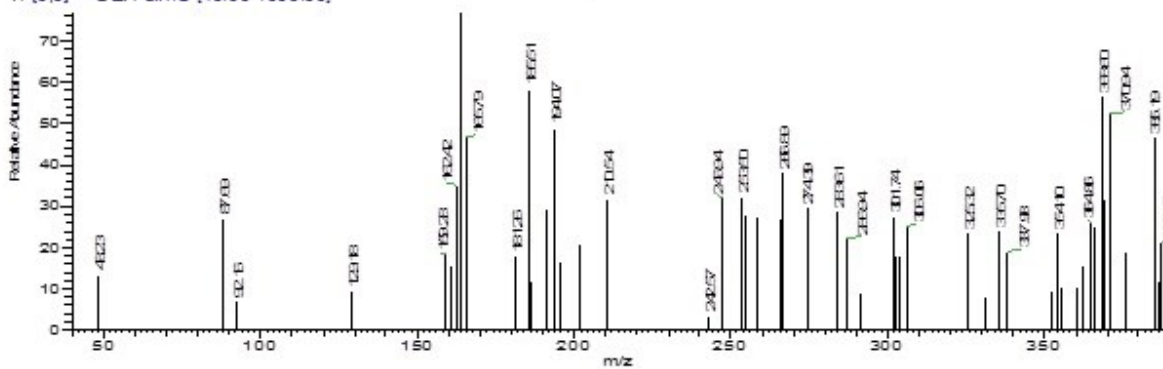

# IR spectrum of compound 35

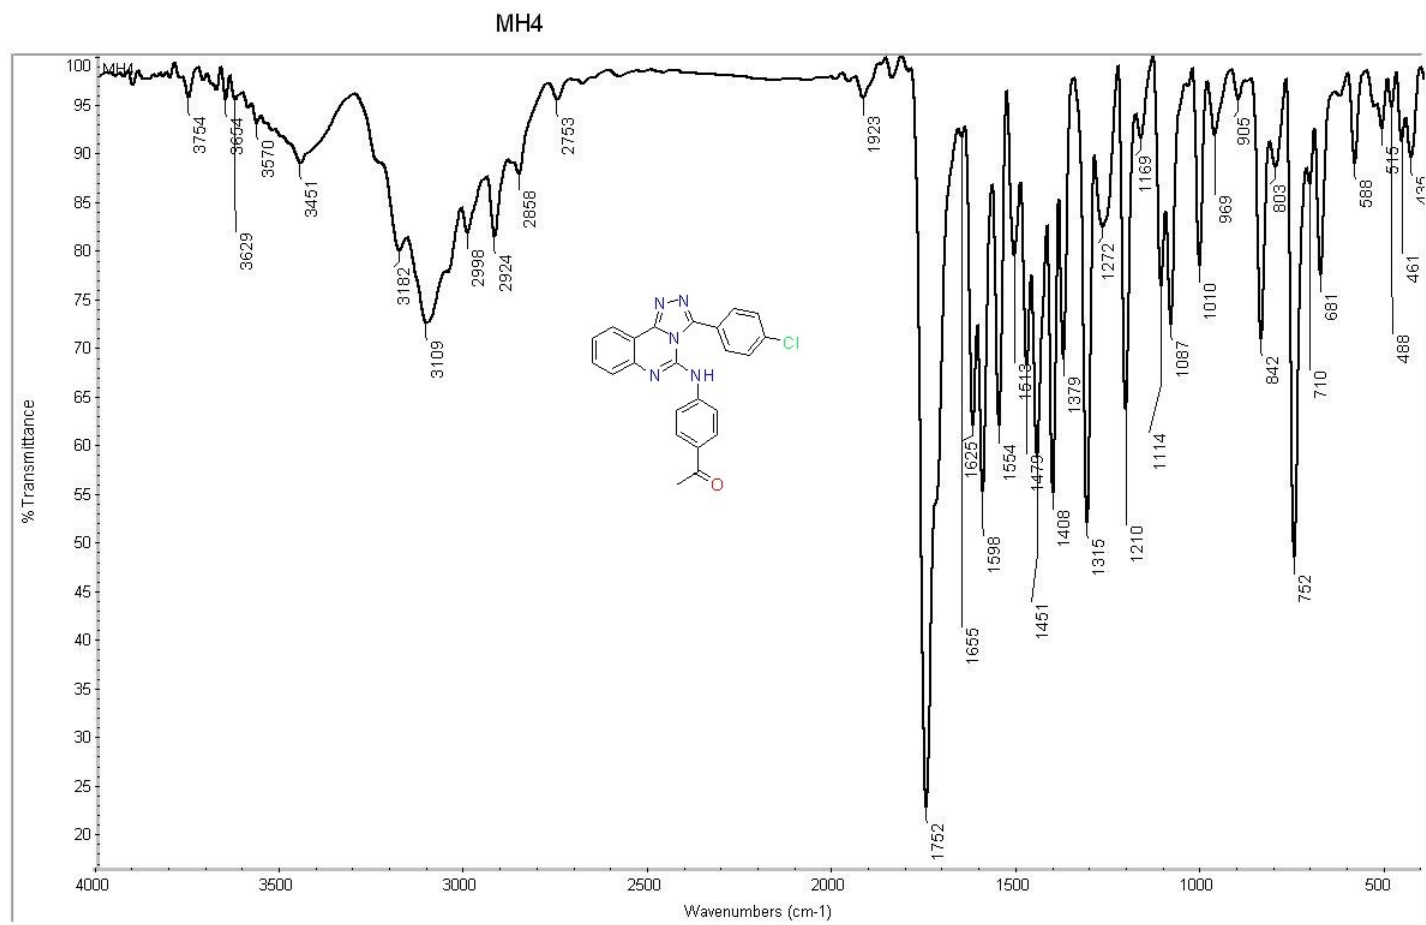

# <sup>1</sup>H NMR Spectrum of compound 35

Mohamed ElShershaby\_H\_MH4

Microanalytical Unit - FOPCU - NMR laboratory  
www.pharma.cu.edu.eg dir-mau.fopcu@pharma.cu.edu.eg

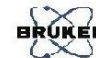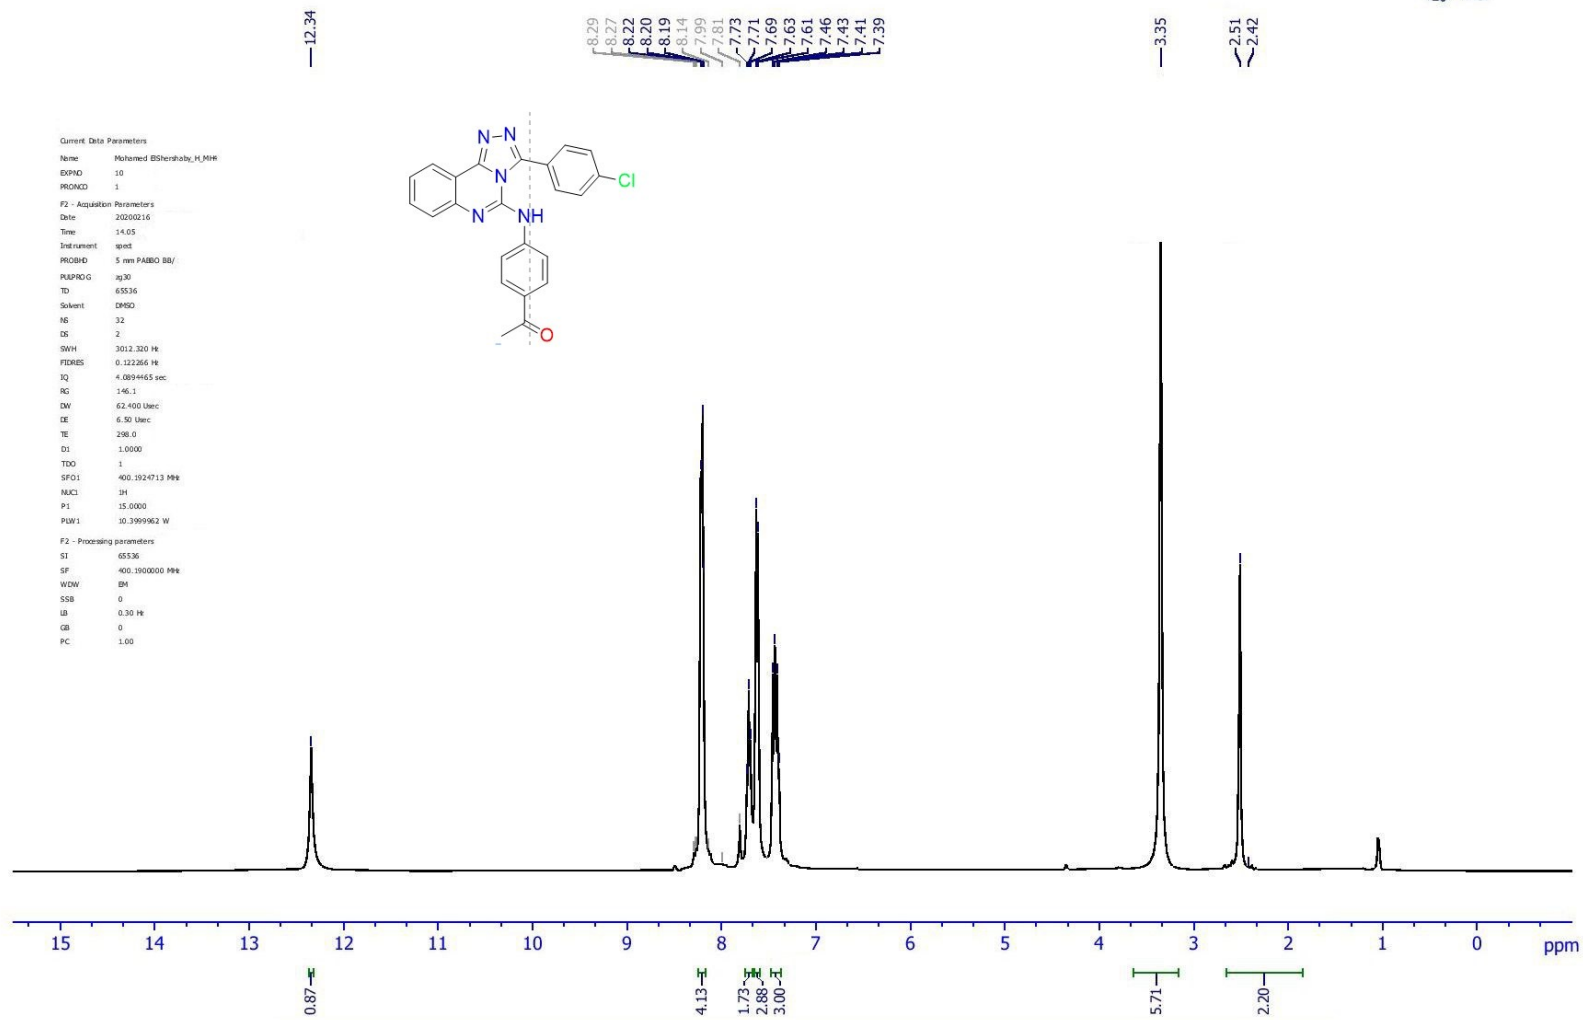



# <sup>13</sup>C NMR Spectrum of compound 35

Mohamed ElShershaby\_C\_MH4

Microanalytical Unit - FOPCU - NMR laboratory  
www.pharma.cu.edu.eg dir-mau.fopcu@pharma.cu.edu.eg

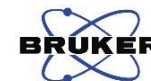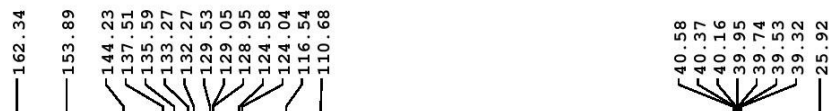

Current Data Parameters  
NAME Mohamed ElShershaby\_C\_M  
EXPNO 10  
PROCNO 1

F2 - Acquisition Parameters  
Date\_ 20200309  
Time 11.28  
INSTRUM spect  
PROBHD 5 mm PABBO BB/  
PULPROG zgpg30  
TD 65536  
SOLVENT DMSO  
NS 1200  
DS 4  
SWH 24038.461 Hz  
FIDRES 0.366798 Hz  
AQ 1.3631488 sec  
RG 202.37  
DW 20.800 usec  
DE 6.50 usec  
TE 298.1 K  
D1 2.00000000 sec  
D11 0.03000000 sec  
TD0 1

==== CHANNEL f1 =====  
SFO1 100.6379178 MHz  
NUC1 13C  
P1 10.00 usec  
PLW1 45.00000000 W  
  
==== CHANNEL f2 =====  
SFO2 400.1916008 MHz  
NUC2 1H  
CPDPRG[2] waltz16

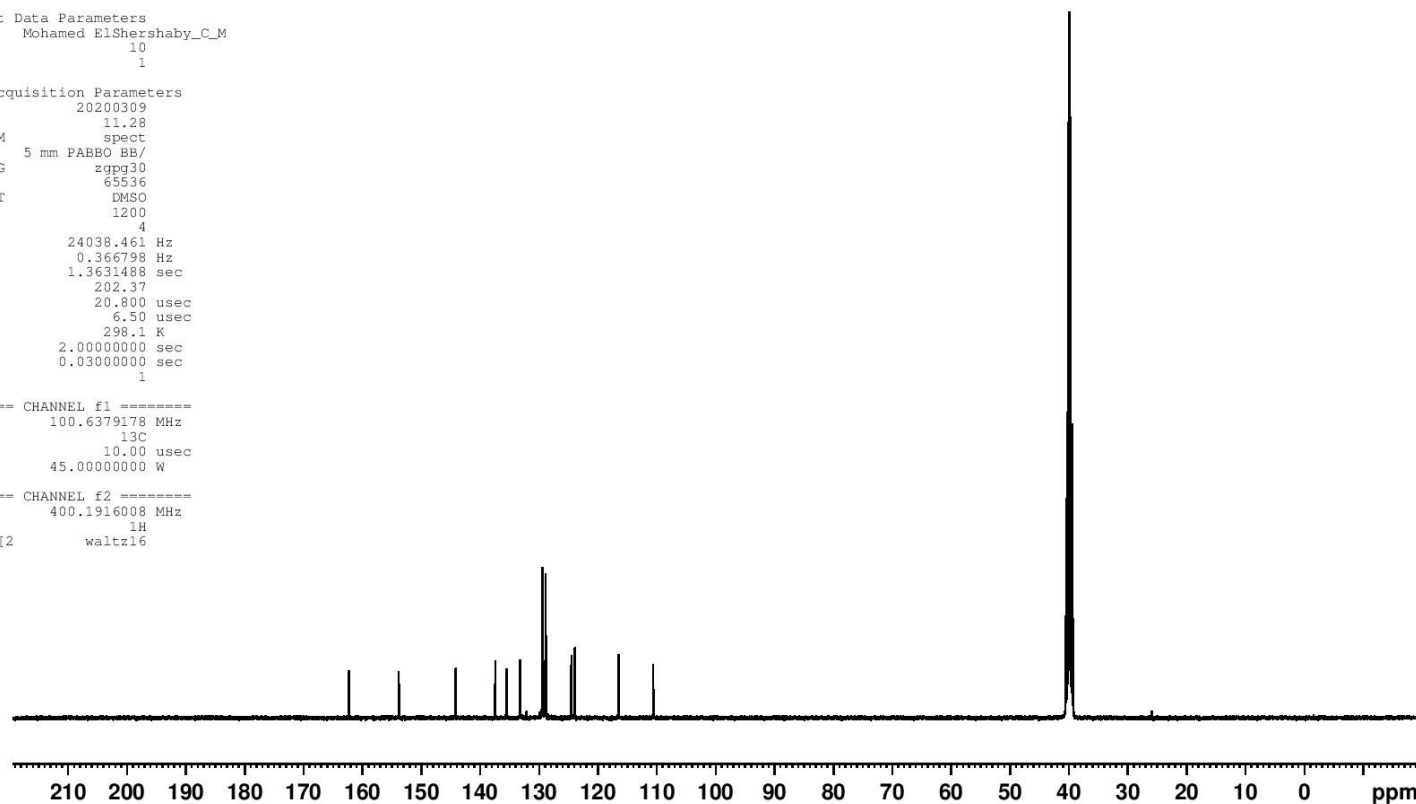

# Mass Spectrum of Compound 35

C:\Xcalibur\data\5\mohamed-hamed-pr4\_2

THE REGIONAL CENTER FOR MYCOLOGY AND BIOTECHNOLOGY  
AZHAR UNIVERSITY

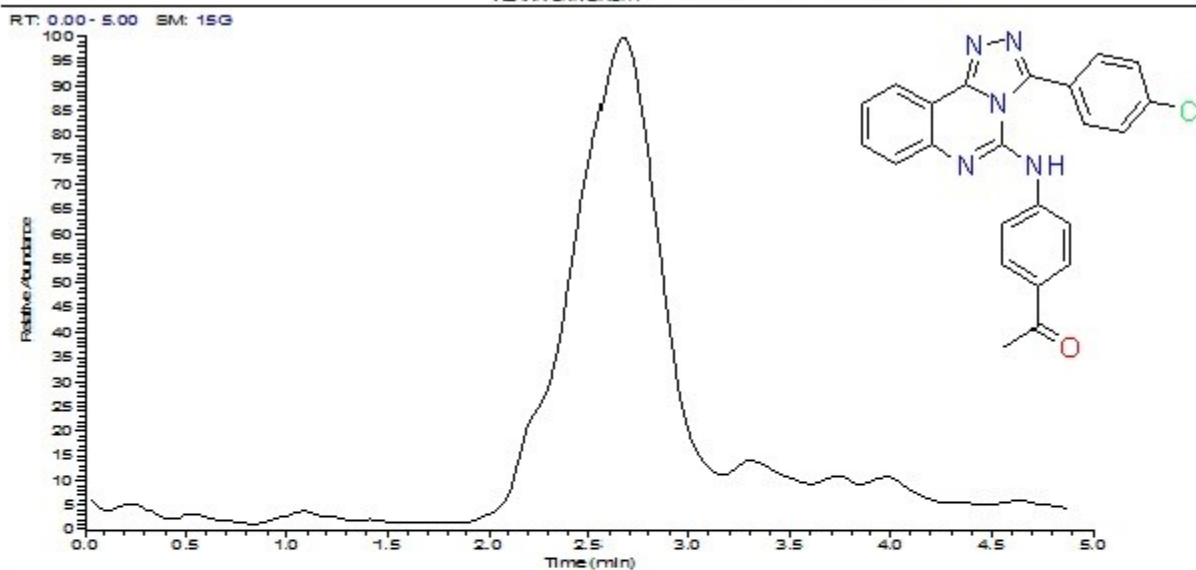

mohamed-hamed-pr4\_2#133 RT: 3.08 AV: 1 SB: 2 4.45, 4.45 NL: 1.91E3  
T: (0,0) - c EI Full ms (40.00-1000.00)

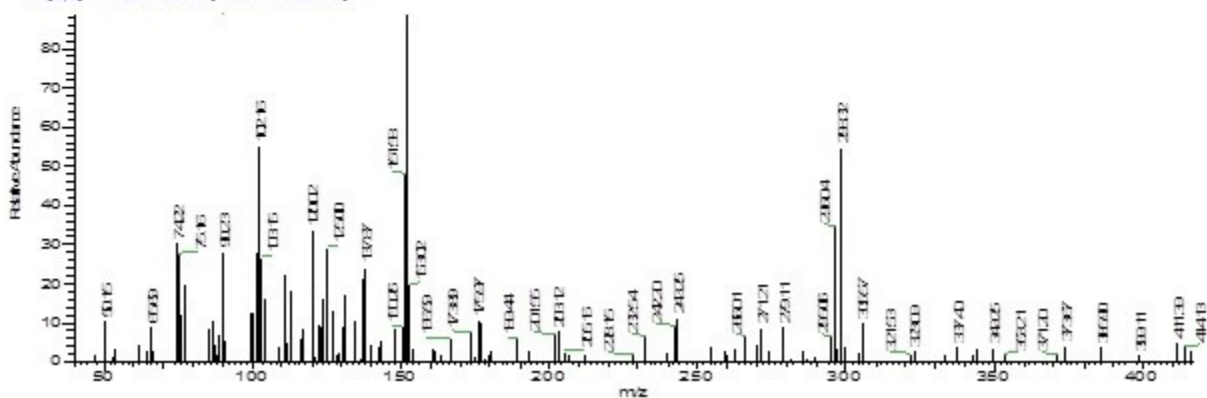

Supplement: d1nj00710f1.pdf [file d1nj00710f1.pdf]
